# Supplementary material for: Is having asthma associated with an increased risk of dying from cardiovascular disease? A prospective cohort study of 446 346 Taiwanese adults
Source: PubMed Central journal article supplement — BMJ Open. 2018 May 31;8(5):e019992. doi: 10.1136/bmjopen-2017-019992 (PMC5988076; doi:10.1136/bmjopen-2017-019992), 2018-05-31
Supplement: bmjopen-2017-019992.draft_revisions.pdf [file bmjopen-2017-019992.draft_revisions.pdf]

# BMJ Open

BMJ Open is committed to open peer review. As part of this commitment we make the peer review history of every article we publish publicly available.

When an article is published we post the peer reviewers' comments and the authors' responses online. We also post the versions of the paper that were used during peer review. These are the versions that the peer review comments apply to.

The versions of the paper that follow are the versions that were submitted during the peer review process. They are not the versions of record or the final published versions. They should not be cited or distributed as the published version of this manuscript.

BMJ Open is an open access journal and the full, final, typeset and author-corrected version of record of the manuscript is available on our site with no access controls, subscription charges or pay-per-view fees (<http://bmjopen.bmj.com>).

If you have any questions on BMJ Open's open peer review process please email [info.bmjopen@bmj.com](mailto:info.bmjopen@bmj.com)

# BMJ Open

## Asthma and cardiovascular disease mortality: a cohort study of 446 346 Taiwanese adults

|                                 |                                                                                                                                                                                                                                                                                                                                                                                                                                                                                                                                                                                                                                                                                                                                                                                                                                                                          |
|---------------------------------|--------------------------------------------------------------------------------------------------------------------------------------------------------------------------------------------------------------------------------------------------------------------------------------------------------------------------------------------------------------------------------------------------------------------------------------------------------------------------------------------------------------------------------------------------------------------------------------------------------------------------------------------------------------------------------------------------------------------------------------------------------------------------------------------------------------------------------------------------------------------------|
| Journal:                        | <i>BMJ Open</i>                                                                                                                                                                                                                                                                                                                                                                                                                                                                                                                                                                                                                                                                                                                                                                                                                                                          |
| Manuscript ID                   | bmjopen-2017-019992                                                                                                                                                                                                                                                                                                                                                                                                                                                                                                                                                                                                                                                                                                                                                                                                                                                      |
| Article Type:                   | Research                                                                                                                                                                                                                                                                                                                                                                                                                                                                                                                                                                                                                                                                                                                                                                                                                                                                 |
| Date Submitted by the Author:   | 06-Oct-2017                                                                                                                                                                                                                                                                                                                                                                                                                                                                                                                                                                                                                                                                                                                                                                                                                                                              |
| Complete List of Authors:       | Strand, Linn Beate; Norges teknisk-naturvitenskapelige universitet, Department of Public Health and Nursing<br>Tsai, Min; College of Public Health, National Taiwan University, Institute of Epidemiology and Preventive Medicine; China Medical University Hospital, Taiwan and Institute of Population Health Science, National Health Research Institutes<br>Wen, Chi-Pang ; National Health Research Institutes, Taiwan and Institute of Population Health Science; China Medical University Hospital<br>Chang, Shu-Sen; National Taiwan University, Institute of Health Behaviors and Community Sciences and Department of Public Health<br>Brumpton, Ben; St Olav Hospital, Department of Thoracic and Occupational Medicine; Norwegian University of Science and Technology, K.G. Jebsen Center for Genetic Epidemiology, Department of Public Health and Nursing |
| <b>Primary Subject Heading</b>: | Epidemiology                                                                                                                                                                                                                                                                                                                                                                                                                                                                                                                                                                                                                                                                                                                                                                                                                                                             |
| Secondary Subject Heading:      | Epidemiology                                                                                                                                                                                                                                                                                                                                                                                                                                                                                                                                                                                                                                                                                                                                                                                                                                                             |
| Keywords:                       | Asthma < THORACIC MEDICINE, CARDIOLOGY, EPIDEMIOLOGY                                                                                                                                                                                                                                                                                                                                                                                                                                                                                                                                                                                                                                                                                                                                                                                                                     |
|                                 |                                                                                                                                                                                                                                                                                                                                                                                                                                                                                                                                                                                                                                                                                                                                                                                                                                                                          |

SCHOLARONE™  
Manuscripts

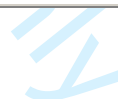

1  
2  
3  
4 **Asthma and cardiovascular disease mortality: a cohort study of 446 346 Taiwanese**  
5 **adults**  
6  
7

8  
9 **Author names:**  
10

11 Linn B. Strand, PhD <sup>a</sup>, Min Kuang Tsai, MS <sup>b,c</sup>, Chi Pang Wen, MD, PhD <sup>\*c</sup>, Shu-Sen Chang,  
12 MD, PhD <sup>\*d</sup>, Ben M. Brumpton, PhD <sup>e</sup>  
13  
14  
15

16  
17  
18 <sup>a</sup>**Affiliation:** Department of Public Health and Nursing, Norwegian University of Science and  
19 Technology, Hakon Jarls gate 11, 7495 Trondheim, Norway.  
20  
21

22  
23 <sup>b</sup>**Affiliations:** Institute of Epidemiology and Preventive Medicine, College of Public Health,  
24 National Taiwan University, No 17, Xu-Zhou Road, Taipei City 10055, Taiwan.  
25  
26

27  
28  
29 <sup>c</sup> **Affiliations:** China Medical University Hospital, 91 Hsueh-Shih Road, Taichung 40402,  
30 Taiwan and Institute of Population Health Science, National Health Research Institutes, 35  
31 Keyan Road, Zhunan Town, Miaoli County 350, Taiwan.  
32  
33  
34

35  
36  
37 <sup>d</sup> **Affiliation:** Institute of Health Behaviors and Community Sciences and Department of  
38 Public Health, College of Public Health, National Taiwan University, No 17, Xu-Zhou Road,  
39 Taipei City 10055, Taiwan.  
40  
41  
42

43  
44  
45 <sup>e</sup> **Affiliations:** Department of Thoracic and Occupational Medicine, St Olav Hospital,  
46 Prinsesse Kristinas gate 3, 7030 Trondheim, K.G. Jebsen Center for Genetic Epidemiology,  
47 Department of Public Health and Nursing, Faculty of Medicine and Health Sciences,  
48 Norwegian University of Science and Technology, NTNU, Trondheim, Hakon Jarls gate 11,  
49 7495 Trondheim, Norway.  
50  
51  
52  
53  
54  
55

1  
2  
3 **\*Correspondence to:**  
4

5 Chi Pang Wen  
6

7 China Medical University Hospital, 91 Hsueh-Shih Road, Taichung City 40402, Taiwan  
8

9 Email: [cwengood@nhri.org.tw](mailto:cwengood@nhri.org.tw)  
10

11 Shu-Sen Chang  
12

13  
14 College of Public Health, National Taiwan University, Taipei, Taiwan, No 17, Xu-Zhou  
15 Road, Taipei City 10055, Taiwan  
16

17  
18 Email: [shusenchang@ntu.edu.tw](mailto:shusenchang@ntu.edu.tw)  
19

20 **Key words:** Asthma, cardiology, epidemiology  
21

22  
23 **Word count:** 3337  
24  
25  
26  
27  
28  
29  
30  
31  
32  
33  
34  
35  
36  
37  
38  
39  
40  
41  
42  
43  
44  
45  
46  
47  
48  
49  
50  
51  
52  
53  
54  
55  
56  
57  
58  
59  
60

## ABSTRACT

**Objectives:** A significant proportion of cardiovascular disease (CVD) cannot be explained by well-known risk factors such as high cholesterol, hypertension and diabetes. One potential novel risk factor for CVD is asthma. We aimed to investigate the association between asthma and mortality due to cardiovascular disease.

**Design:** Prospective cohort study.

**Setting:** A large health check-up program from 1994 to 2011 in Taipei, Taiwan.

**Participants:** 446 346 Taiwanese adults. Each participant answered questions regarding asthma history (yes/no) and current daily use of asthma medications (yes/no). Active asthma was defined as those using current daily medication for asthma.

**Outcomes:** The participants were followed for mortality from CVD, coronary heart disease (CHD), and stroke obtained through linkage to the cause-of-death register until 31<sup>st</sup> December 2011.

**Results:** We found an increased risk of dying from CVD in individuals with active asthma (adjusted hazard ratio 1.32, 95 % confidence interval 1.08-1.62). The risk of death from CHD or stroke was increased in a similar manner. For deaths from CVD, CHD and stroke we found stronger associations with active asthma than non-active asthma, and for CVD and stroke stronger associations in men than women.

**Conclusion:** Our study suggests that asthma, particularly active asthma, may have adverse cardiovascular consequences.

**Word count:** 202

### Strengths and limitations of this study

- To our best knowledge this is the largest study to date on asthma and CVD mortality.
- We had objective measures of lung function that allowed us to exclude possible misclassification of asthma with COPD.
- However there is no gold standard for asthma diagnosis and asthma was confirmed based on self-report from a questionnaire.
- Finally, Taiwan has some of the lowest mortality rates from CVD in the world; our sample was young and this led to a relatively small number of CVD deaths.

## INTRODUCTION

An estimated 17 million people die of cardiovascular diseases (CVDs) every year(1). Among the main forms of CVD are coronary heart disease (CHD) and stroke(1). Some well-known factors that increase the risk of developing CVD are unfavorable cholesterol levels, high blood pressure, diabetes and cigarette smoking. A significant proportion of CVD cannot be explained by these known risk factors, and a high incidence of the diseases makes it important to detect other potentially modifiable risk factors. One novel potential risk factor is asthma. As much as 330 million adults worldwide are estimated to have asthma,(2) emphasizing the potential public health importance of any effect of asthma on the occurrence of CVD. Such an association is plausible as it is suggested that asthma is associated with low-grade systemic inflammation and decline in pulmonary function,(3) which has been linked to an increase in CVD later in life(4, 5). Despite the plausibility of such an association, only few studies have investigated the association between asthma and risk of CVD(5, 6). For example, Iribarren et al(6) recently reported a risk ratio (RR) of 1.22 (95% confidence interval [CI] 1.14 to 1.31) for CVD related death or hospitalization in women with asthma compared with women without asthma after adjusting for demographic and established CVD risk factors; there was no association in men. To considerably strengthen the existing evidence for a causative association, there is a need for large prospective studies on asthma and the risk of CVD which can additionally investigate the influence of sex.

Approximately 5.5 million people die from stroke every year(1). Among the survivors, the consequences on physical, cognitive and emotional functioning are potentially devastating. Despite the devastating consequences of stroke, asthma as a novel risk factor has not been thoroughly investigated and only a few studies have examined this association(5, 7). Our aim was to examine whether asthma at baseline was associated with an increased risk of

1  
2  
3 deaths from CVD, and more specifically, CHD and stroke utilizing a large cohort of more  
4  
5 than 400,000 Taiwanese adults participating in a health check-up program.  
6  
7

## 8 9 **METHODS**

### 10 11 12 **Study population**

13  
14 The original study cohort consisted of 593,225 Taiwanese adults aged 20 years or older who  
15  
16 participated in a large health check-up program from 1994 to 2011, run by MJ Health  
17  
18 Management Institution, Taipei, Taiwan (<https://www.mjclinic.com.tw>). The baseline  
19  
20 questionnaire included questions about history of asthma and current use of asthma  
21  
22 medications. The participants went through a number of biochemical tests and physical  
23  
24 examinations as described previously(8). The study was based on 446,346 (75%) participants  
25  
26 who attended check-ups between 1998 and 2011 and who had full information on asthma,  
27  
28 asthma medications, and potential confounding variables including sociodemographic and life  
29  
30 style factors.  
31  
32

### 33 34 **Asthma**

35  
36  
37 Participants answered questions related to asthma history (yes/no) and current daily  
38  
39 use of asthma medications (yes/no). We first defined 'ever asthma' as those reporting a  
40  
41 history of asthma or current daily use of asthma drugs, and then grouped these individuals  
42  
43 into two subgroups: 1) non-active asthma (those who only reported a history of asthma but not  
44  
45 current use of asthma medications) and; 2) active asthma (those who reported current daily  
46  
47 use of asthma medications). Self-reported asthma is commonly used in population based  
48  
49 studies; this approach has been rigorously evaluated and displays reasonable sensitivity and  
50  
51 specificity(9, 10).  
52  
53

### 54 55 **CVD mortality**



1  
2 From baseline, the participants were followed for mortality until the end of follow-up, 31<sup>st</sup>  
3  
4 December 2011, through linkage to the Taiwanese cause-of-death register using the national  
5  
6 identification numbers. The International Classification of Diseases, Ninth Revision (ICD-9)  
7  
8 or Tenth Revision (ICD-10), codes were used to identify mortality from CVD (ICD-9 390-  
9  
10 459; ICD-10 I00-I99), CHD (ICD-9 codes 410-414; ICD-10 I20-I25), and stroke (ICD-9 430-  
11  
12 438; ICD-10 I60-I69).  
13  
14

### 15 16 **Covariates**

17  
18 At the baseline health check-up participants were wearing light-weight clothes and were  
19  
20 measured barefoot. Their weight (to the nearest 0.1 kg) and height (to the nearest mm) were  
21  
22 measured using an auto-anthropometer, Nakamura KN-5000A (Nakamura, Tokyo, Japan) and  
23  
24 their body mass index (BMI) was calculated ( $\text{kg}/\text{m}^2$ ). After 5 minutes seated rest, blood  
25  
26 pressure was measured twice at 10-minute intervals using a computerized auto-mercury  
27  
28 sphygmomanometer (CH-5000, Citizen, Tokyo, Japan). We used the mean of the two  
29  
30 measurements in our analysis. Glucose, total cholesterol, and triglyceride levels were  
31  
32 measured in blood collected after overnight fasting using the Hitachi 7150 auto-analyzer  
33  
34 (Hitachi Ltd., Tokyo, Japan). Respiratory functions were measured using an electronic  
35  
36 spirometer (HI-501, HI-701, or HI-801; Chest M.I. Inc., Tokyo, Japan).  
37  
38  
39  
40

41 The participants reported their education (middle school or below, high school, junior  
42  
43 college, college or higher), marital status (single, married, divorced or separated, widowed),  
44  
45 smoking (never, former, current), alcohol consumption (no or occasional use, former  
46  
47 drinking, regular drinking), and physical activity (inactive, low, moderate or high). They also  
48  
49 reported whether they had a history of hypertension, diabetes, heart disease, heart surgery,  
50  
51 stroke, or whether they were taking medications for hypertension, diabetes, or heart diseases.  
52  
53 In the study hypertension was defined as the presence of any of the following: reporting a  
54  
55 history of hypertension, taking any hypertensive drugs, a systemic blood pressure  $\geq 140$   
56  
57

1  
2  
3 mmHg, or a diastolic blood pressure  $\geq 90$  mmHg. Diabetes was defined as the presence of  
4  
5 any of the following: reporting a history of diabetes, taking diabetes medications, or a fasting  
6  
7 blood sugar  $\geq 126$  mmol/L.  
8

### 9 10 **Statistical methods**

11  
12 We used Cox proportional hazards models to investigate the associations of self-reported  
13  
14 asthma with CVD, CHD and stroke mortality respectively. Time at entry was date of  
15  
16 recruitment and time of exit was 31<sup>st</sup> December 2011, or death if earlier.  
17  
18

19 For ever asthma (those answering “yes” to asthma history or use of asthma  
20  
21 medications), we estimated the association with CVD, CHD and stroke mortality controlling  
22  
23 for age and sex. In a second model we controlled for age, sex, education and marital status,  
24  
25 smoking, alcohol consumption, physical activity, hypertension, diabetes, BMI, total  
26  
27 cholesterol, triglycerides, and history of heart disease/heart surgery/use of heart drug, and  
28  
29 history of stroke. We also investigated the associations of CVD, CHD and stroke mortality  
30  
31 with active and non-active asthma separately, compared to those without asthma.  
32  
33

34  
35 We investigated whether the associations differed in men and women, between age  
36  
37 groups (above and below 60 years) and by smoking status (non-current smoker vs. current  
38  
39 smokers) by including appropriate interaction terms in the models and conducting subgroup  
40  
41 analyses. We then reported the p value for interaction by comparing models with and without  
42  
43 the interaction terms using a likelihood ratio test.  
44  
45

46 We conducted a series of sensitivity analyses to test the robustness of findings. First,  
47  
48 we excluded deaths due to CVD, CHD, or stroke occurring in the first two years of follow-up  
49  
50 and repeated the analyses, as these deaths may be due to pre-existing cardiovascular diseases  
51  
52 but not asthma. We excluded participants with a history of heart disease, heart surgery, use of  
53  
54 heart medications and a history of stroke at baseline in a second sensitivity analysis. Lastly,  
55  
56  
57  
58  
59  
60

we excluded participants with possible chronic obstructive pulmonary disease (COPD) at baseline. In this analysis we excluded those who had an FEV<sub>1</sub>/FVC ratio (forced expiratory volume in 1 second divided by forced vital capacity) < 0.7.

The proportional hazards assumption was examined by plotting Schoenfeld residuals with time and by examining their correlation.

### Ethics approval

Our study complies with the Declaration of Helsinki; the China Medical University Hospital ethics committee has approved the research protocol and informed consent has been obtained from the subjects. The study was approved by the National Health Research Institutes, Taiwan, and the MJ Health Management Institution.

### RESULTS

Among the 446,346 participants there were 2,945 deaths from cardiovascular disease, 780 deaths from coronary heart disease and 1,146 deaths from stroke over the follow-up period.

At baseline, 3.34% (n=14,917) of the participants reported to have ever asthma; 2.60% (n=11,603) reported to have a history of asthma only and 0.74% (n=3,314) reported to have active asthma. The characteristics of the participants according to baseline asthma status are presented in Table 1.

Table 1. Characteristics of the Participants in the MJ Health Check-up Programme, Taiwan (N=446346).

| Characteristic              | Asthma<br>(N= 14917) |        | No asthma<br>(N= 431429) |        |
|-----------------------------|----------------------|--------|--------------------------|--------|
|                             | <i>n</i>             | (%)    | <i>n</i>                 | %      |
| Female                      | 6,893                | (46.2) | 220,253                  | (51.1) |
| College or higher education | 5,726                | (38.4) | 143,649                  | (33.3) |
| Married                     | 8,659                | (58.0) | 281,011                  | (65.1) |
| Current smoker              | 3,461                | (23.2) | 98,730                   | (22.9) |
| Regular alcohol use         | 1,210                | (8.1)  | 29,884                   | (6.9)  |
| Physically inactive         | 7,462                | (50.0) | 220,976                  | (51.2) |

|                                                                                                                                                     |             |             |             |             |
|-----------------------------------------------------------------------------------------------------------------------------------------------------|-------------|-------------|-------------|-------------|
| Hypertension (history of hypertension + hypertensive drug use + systolic blood pressure $\geq 140$ mmHg or diastolic blood pressure $\geq 90$ mmHg) | 3,121       | (20.9)      | 77,972      | (18.1)      |
| Diabetes (history of diabetes + diabetes drug use + fasting blood glucose $\geq 126$ ) mmol/L)                                                      | 841         | (5.6)       | 21,274      | (4.9)       |
| History of heart disease/heart surgery/use of heart drug                                                                                            | 1,045       | (7.0)       | 15,044      | (3.5)       |
| History of stroke                                                                                                                                   | 129         | (0.9)       | 2,050       | (0.5)       |
|                                                                                                                                                     | <i>Mean</i> | <i>(SD)</i> | <i>Mean</i> | <i>(SD)</i> |
| Age (years)                                                                                                                                         | 41.0        | (15.6)      | 40.0        | (13.4)      |
| Body mass index (kg/m <sup>2</sup> )                                                                                                                | 23.4        | (3.8)       | 23.0        | (3.6)       |
| Total cholesterol (mmol/L)                                                                                                                          | 5.0         | (1.0)       | 5.0         | (1.0)       |
| Triglycerides (mmol/L)                                                                                                                              | 3.0         | (2.4)       | 3.0         | (2.6)       |

In the age- and sex-adjusted model (Model 1), those with ever asthma had a 27% (Hazard Ratio (HR) 1.27, 95% Confidence Interval [CI]: 1.09, 1.48) increased risk of CVD (Table 2). In the multi-adjusted model (Model 2) the association attenuated (HR 1.13, 95% CI: 0.97, 1.31). Using a stricter definition of asthma (active asthma) we found that those that reported any current use of asthma medications had a 32% (HR 1.32, 95% CI: 1.08, 1.62) increased risk of dying from CVD in Model 2. In contrast there was no association of non-active asthma with CVD mortality (HR 0.96, 95% CI: 0.77, 1.62).

1  
2  
3  
4  
5  
6  
7  
8  
9  
10  
11  
12  
13  
14  
15  
16  
17  
18  
19  
20  
21  
22  
23  
24  
25  
26  
27  
28  
29  
30  
31  
32  
33  
34  
35  
36  
37  
38  
39  
40  
41  
42  
43  
44  
45  
46  
47

Table 2. Hazard Ratios (HRs) for the Association of Asthma with Cardiovascular Disease, Coronary Heart Disease, and Stroke Mortality in the MJ Health Check-up Programme, Taiwan

|                                  | N       | CVD mortality |         |              |         | CHD mortality |           |         |              | Stroke mortality |              |           |         |              |         |              |
|----------------------------------|---------|---------------|---------|--------------|---------|---------------|-----------|---------|--------------|------------------|--------------|-----------|---------|--------------|---------|--------------|
|                                  |         | Cases (n)     | Model 1 |              | Model 2 |               | Cases (n) | Model 1 |              | Model 2          |              | Cases (n) | Model 1 |              | Model 2 |              |
|                                  |         |               | HR      | (95% CI)     | HR      | 95% CI        |           | HR      | 95% CI       | HR               | 95% CI       |           | HR      | 95% CI       | HR      | 95% CI       |
| No asthma                        | 431,429 | 2,763         | 1.00    |              | 1.00    |               | 730       | 1.00    |              | 1.00             |              | 1078      | 1.00    |              | 1.00    |              |
| Asthma                           | 14,917  | 182           | 1.27    | (1.09 ,1.48) | 1.13    | (0.97 ,1.31)  | 50        | 1.29    | (0.97 ,1.72) | 1.09             | (0.82 ,1.45) | 68        | 1.23    | (0.96 ,1.57) | 1.14    | (0.89 ,1.46) |
| Non-active asthma (history only) | 11,603  | 84            | 1.04    | (0.84 ,1.29) | 0.96    | (0.77 ,1.19)  | 25        | 1.16    | (0.78 ,1.73) | 1.03             | (0.69 ,1.53) | 35        | 1.11    | (0.80 ,1.56) | 1.08    | (0.77 ,1.51) |
| Active asthma (current drug use) | 3,314   | 98            | 1.57    | (1.29 ,1.93) | 1.32    | (1.08 ,1.62)  | 25        | 1.46    | (0.98 ,2.17) | 1.16             | (0.78 ,1.73) | 33        | 1.37    | (0.97 ,1.94) | 1.23    | (0.86 ,1.74) |

Model 1: adjust for age and sex  
 Model 2: adjust for age, education, marital status, smoking, alcohol consumption, physical activity, diabetes, hypertension, body mass index, total cholesterol, triglyceride, history of heart disease/heart surgery/use of heart drug, and history of stroke

1  
2  
3           There was evidence that the association of asthma (grouped as non-active and active  
4 asthma) with the risk of dying from CVD was stronger in males than in females (*P* for  
5 interaction = 0.005 in Model 2) (Table 3). Men who reported ever asthma had a 25%  
6 increased risk (HR 1.25, 95% CI: 1.04, 1.49) of dying from CVD over the duration of the  
7 follow-up in Model 2; among men with ever asthma those with active asthma had a 63%  
8 higher risk (HR 1.63, 95% CI: 1.30, 2.04) compared to men without asthma, while men with  
9 non-active asthma showed no increased risk (HR 0.90, 95% CI: 0.68, 1.19). These  
10 associations were not found in women. When stratifying by age we found no appreciable  
11 differences (Supplementary table 1).  
12  
13  
14  
15  
16  
17  
18  
19  
20  
21  
22  
23  
24  
25  
26  
27  
28  
29  
30  
31  
32  
33  
34  
35  
36  
37  
38  
39  
40  
41  
42  
43  
44  
45  
46  
47  
48  
49  
50  
51  
52  
53  
54  
55  
56  
57  
58  
59  
60

1  
2  
3  
4  
5  
6  
7  
8  
9  
10  
11  
12  
13  
14  
15  
16  
17  
18  
19  
20  
21  
22  
23  
24  
25  
26  
27  
28  
29  
30  
31  
32  
33  
34  
35  
36  
37  
38  
39  
40  
41  
42  
43  
44  
45  
46  
47

Table 3. Hazard ratios (HRs) for the Association of Asthma with Cardiovascular Disease, Coronary Heart Disease, and Stroke Mortality by Sex in the MJ Health Check-up Programme, Taiwan

|                                             | N       | CVD mortality |         |              |         | CHD mortality |           |         |              | Stroke mortality |              |           |         |              |         |              |
|---------------------------------------------|---------|---------------|---------|--------------|---------|---------------|-----------|---------|--------------|------------------|--------------|-----------|---------|--------------|---------|--------------|
|                                             |         | Cases (n)     | Model 1 |              | Model 2 |               | Cases (n) | Model 1 |              | Model 2          |              | Cases (n) | Model 1 |              | Model 2 |              |
|                                             |         |               | HR      | (95% CI)     | HR      | 95% CI        |           | HR      | 95% CI       | HR               | 95% CI       |           | HR      | 95% CI       | HR      | 95% CI       |
| <b>Males</b>                                |         |               |         |              |         |               |           |         |              |                  |              |           |         |              |         |              |
| No asthma                                   | 211,176 | 1,730         | 1.00    |              | 1.00    |               | 494       | 1.00    |              | 1.00             |              | 657       | 1.00    |              | 1.00    |              |
| Asthma                                      | 8,024   | 132           | 1.39    | (1.16 ,1.66) | 1.25    | (1.04 ,1.49)  | 39        | 1.42    | (1.02 ,1.97) | 1.21             | (0.87 ,1.67) | 49        | 1.36    | (1.02 ,1.82) | 1.29    | (0.96 ,1.72) |
| Non-active asthma (history only)            | 6,130   | 50            | 0.96    | (0.73 ,1.28) | 0.90    | (0.68 ,1.19)  | 18        | 1.21    | (0.75 ,1.93) | 1.08             | (0.67 ,1.73) | 20        | 1.02    | (0.65 ,1.59) | 1.00    | (0.64 ,1.56) |
| Active asthma (current drug use)            | 1,894   | 82            | 1.91    | (1.53 ,2.38) | 1.63    | (1.30 ,2.04)  | 21        | 1.67    | (1.08 ,2.59) | 1.34             | (0.86 ,2.08) | 29        | 1.77    | (1.22 ,2.57) | 1.62    | (1.11 ,2.35) |
| <b>Females</b>                              |         |               |         |              |         |               |           |         |              |                  |              |           |         |              |         |              |
| No asthma                                   | 220,253 | 1,033         | 1.00    |              | 1.00    |               | 236       | 1.00    |              | 1.00             |              | 421       | 1.00    |              | 1.00    |              |
| Asthma                                      | 6,893   | 50            | 1.04    | (0.78 ,1.38) | 0.88    | (0.66 ,1.17)  | 11        | 0.97    | (0.53 ,1.78) | 0.82             | (0.44 ,1.51) | 19        | 0.98    | (0.62 ,1.56) | 0.89    | (0.56 ,1.42) |
| Non-active asthma (history only)            | 5,473   | 34            | 1.17    | (0.83 ,1.65) | 1.05    | (0.74 ,1.48)  | 7         | 1.05    | (0.49 ,2.22) | 0.93             | (0.44 ,1.99) | 15        | 1.28    | (0.77 ,2.14) | 1.21    | (0.72 ,2.03) |
| Active asthma (current drug use)            | 1,420   | 16            | 0.83    | (0.51 ,1.36) | 0.65    | (0.40 ,1.07)  | 4         | 0.86    | (0.32 ,2.32) | 0.67             | (0.25 ,1.81) | 4         | 0.52    | (0.20 ,1.40) | 0.45    | (0.17 ,1.20) |
| <b>Sex interaction p</b>                    |         |               |         |              |         |               |           |         |              |                  |              |           |         |              |         |              |
| Asthma (yes/no)                             |         |               | 0.19    |              | 0.10    |               | 0.40      |         | 0.27         |                  | 0.33         |           | 0.29    |              |         |              |
| Asthma (no, history only, history and drug) |         |               | 0.012   |              | 0.005   |               | 0.62      |         | 0.42         |                  | 0.043        |           | 0.032   |              |         |              |

Model 1: adjust for age  
Model 2: adjust for age, education, marital status, smoking, alcohol consumption, physical activity, diabetes, hypertension, body mass index, total cholesterol, triglyceride, history of heart disease/heart surgery/use of heart drug, and history of stroke

1  
2  
3 When only looking at CHD mortality in the total sample, we found consistent  
4 associations with those of CVD mortality, although the associations of asthma and CHD  
5 mortality were somewhat weaker with limited statistical evidence given the smaller number of  
6 deaths and thus reduced power (Table 3). When stratifying by sex, we found a 67% increased  
7 risk (HR 1.67, 95% CI: 1.08, 2.59) for active asthma in men in the age adjusted model (Model  
8 1) but the association was largely attenuated when additionally adjusting for potential  
9 confounders (Model 2). We did not find any association in women (Table 3). Similarly, we  
10 found a more than doubled risk in those below 60 years (HR 2.57, 95% CI: 1.06, 6.26) in  
11 Model 1 but the confidence interval was wide and the association was attenuated when  
12 adjusting for potential confounders (Supplementary Table 1).  
13  
14  
15  
16  
17  
18  
19  
20  
21  
22  
23  
24

25 When restricting our analyses to only stroke, we found similar but slightly weaker  
26 associations between asthma and stroke mortality (Table 1). We found a 77% increased risk in  
27 men with active asthma (HR 1.77, 95% CI: 1.22, 2.57) in Model 1, that persisted after  
28 adjusting for potential confounders in Model 2 (HR 1.62, 95% CI: 1.11, 2.35) (Table 2). This  
29 risk was not seen in women ( $P$  for interaction = 0.032). We found no differences in risk of  
30 having a stroke death associated with asthma between the age groups (i.e. below and above 60  
31 years old) (Supplementary Table 1).  
32  
33  
34  
35  
36  
37  
38  
39

40 When excluding deaths occurring during the two first years of follow-up, the results  
41 did not change considerably for any of the cardiovascular outcomes (Supplementary table 2).  
42  
43 When excluding participants with a history of heart disease, heart surgery, use of heart  
44 medications and a history of stroke at baseline, the results were generally similar to those of  
45 the main analysis except that the association between asthma and CHD was largely attenuated,  
46 although the number of CHD deaths was small ( $n=13$  and 10 in the non-active and active  
47 asthma groups respectively) in this analysis (Supplementary table 3). When excluding  
48 individuals with FEV1/FVC ratio  $<0.7$  at baseline, the analysis based on the remaining  
49  
50  
51  
52  
53  
54  
55  
56  
57  
58  
59  
60



1  
2  
3 sample showed that the effect estimate remained the same although the confidence interval  
4  
5 widened slightly because of lower power in this analysis (Supplementary table 4).  
6

7  
8 Overall there was no strong statistical evidence for a difference in the  
9  
10 association of asthma with CVD/CHD/Stroke mortality between current smokers and non-  
11  
12 current smokers (all p for interaction > 0.05), although there was a tendency towards stronger  
13  
14 associations in current smokers than in non- or ex-smokers (Supplementary table 5).  
15

## 16 17 18 **DISCUSSION**

19  
20 To our best knowledge this is the largest study to date on asthma and CVD mortality. In this  
21  
22 sample of more than 400,000 Taiwanese adults we found an increased risk of dying from  
23  
24 CVD in individuals with active, but not non-active, asthma. The risk of death from CHD or  
25  
26 stroke was increased in a similar manner, however in sensitivity analysis excluding those with  
27  
28 previous heart disease, only the associations with CVD and stroke mortality remained. For  
29  
30 deaths from CVD and stroke we found a stronger association with active asthma in men than  
31  
32 in women.  
33

34  
35 A few previous studies have investigated the association of asthma with risk of  
36  
37 cardiovascular disease. One very large recent study including almost one million Italian adults  
38  
39 agreed with our findings and reported asthma to be moderately associated with different  
40  
41 cardiovascular diseases(11). Additionally, this study did not find any differences in the  
42  
43 association between men and women, while our study observed a stronger association in men.  
44  
45 This Italian study was cross-sectional however, and there is no way of knowing whether the  
46  
47 CVD diagnosis preceded the asthma diagnosis. Additionally, this study did not have access to  
48  
49 spirometry measurements such as FEV<sub>1</sub> and FVC and thus was not able to exclude those with  
50  
51 a FEV<sub>1</sub>/FVC ratio of less than 0.7 to minimise the possibility of misclassification between  
52  
53 asthma and COPD.  
54  
55  
56  
57  
58  
59  
60

1  
2  
3 A smaller study was undertaken in Australia including approximately 4000 people  
4 amongst whom 500 were classified as having asthma(12). Individuals with asthma were not  
5 only identified by self-report, but also through identification of significant reversibility of  
6 airway obstruction. The result were in accordance with our findings and when subjects with  
7 COPD were excluded from the analysis ( $FEV_1/FVC < 0.7$  and  $FEV_1 < 80\%$  of predicted), the  
8 association of asthma with CVD remained.  
9  
10  
11  
12  
13  
14  
15

16 Coronary heart disease contributes to a large part of the burden of cardiovascular  
17 disease(13) and the risk of complications or even death is high, thus detecting novel risk  
18 factors is essential. A few studies have found an increased risk of CHD in patients with  
19 asthma(14, 15). However, the results are inconsistent, and a recent study including almost  
20 16 000 participants from the Atherosclerosis Risk in Communities (ARIC) Study failed to  
21 confirm this increase in risk of CHD in patients with current asthma (HR 0.69, 95% CI: 0.46,  
22 1.05) (5).  
23  
24  
25  
26  
27  
28  
29  
30  
31

32 In the current study, we did not find any differences in the association of asthma with  
33 CHD between men and women. Other studies have previously found sex differences. A large  
34 prospective study by Iribarren and colleagues(16) found that the increased risk of CHD was  
35 higher in women with asthma (RR 1.49, 95% CI: 1.43, 1.56) than in men (RR 1.28, 95% CI:  
36 1.21, 1.34) ( $P$  for interaction  $< 0.001$ ). The authors speculate that the increased risk of CHD  
37 among people with asthma may be due to chronic inflammation in people with asthma.  
38 Supporting this is the fact that women with asthma tend to have more severe disease than men  
39 with asthma,(17) and likely more systemic inflammation. By contrast, we generally observed  
40 stronger results in men than in women in this adult Taiwanese population.  
41  
42  
43  
44  
45  
46  
47  
48  
49  
50

51  
52 In spite of the devastating consequences of stroke, asthma as a novel risk factor has not been  
53 thoroughly investigated and only a few studies have examined this association. The  
54  
55  
56  
57

1  
2  
3 previously mentioned study using data from the ARIC Study,(5) found similar results to ours,  
4  
5 with a 55% increased risk of stroke (HR 1.55, 95% CI: 0.95, 2.52) in patients with current  
6  
7 asthma compared with those without asthma. A recent meta-analysis of five studies on asthma  
8  
9 and stroke found a pooled HR of 1.32 (95% CI: 1.13, 1.54)(18). In contrast to our findings,  
10  
11 this meta-analysis found that the associations between asthma and stroke were stronger in  
12  
13 women (HR 1.42, 95% CI: 1.15, 1.76) than in men (HR 1.19, 95% CI: 0.90, 1.43). The  
14  
15 authors speculate that sex hormones could play a crucial role in modulating immunological  
16  
17 inflammation in asthma. However, our results showed an increased risk in men, but not in  
18  
19 women. The underlying reasons driving these differences between studies is not clear and  
20  
21 further investigations from countries with different ethnicities may help to shed light on this  
22  
23 observation.  
24  
25

26  
27 The biological mechanisms by which asthma may influence CVD are not known, but  
28  
29 several mechanisms have been suggested. Asthma is associated with low-grade systemic  
30  
31 inflammation,(19) which could influence later risk of CVD(20). Previous studies also suggest  
32  
33 that C-reactive protein is associated with both asthma(21) and CVD(22, 23). Lung function  
34  
35 impairment is also associated with CVD risk(24, 25). Patients with impaired lung function  
36  
37 have increased inflammatory markers (including C-reactive protein, interleukin-1 $\beta$ , and  
38  
39 interleukin-6) (26), which are associated with atherosclerosis and cardiovascular events(20,  
40  
41 27). The long-term airway remodelling from the inflammatory response in asthma can  
42  
43 produce irreversible airway obstruction and cause a decline in lung function(28). In addition,  
44  
45 severe asthma exacerbations are associated with a more rapid decline in lung function(29).  
46  
47 Another hypothesis is that asthma is associated with risk of CVD through asthma medication  
48  
49 use, in particular the cardiotoxic effects of beta-2 ( $\beta_2$ ) agonists(30, 31). Finally, asthma may  
50  
51 be associated with CVD due to other factors such as obesity,(32) smoking,(33) or physical  
52  
53 inactivity(34). It is also possible that the association between asthma and CVD is due to  
54  
55  
56  
57  
58  
59  
60

1  
2  
3 comorbidities such as diabetes which has a strong link to CVD(35) and also to asthma(36). In  
4  
5 our study, we adjusted for these potential confounders however and it is unlikely that any  
6  
7 confounding by these factors would be behind the observed associations.  
8

9  
10 To the best of our knowledge, our study is the largest to date, investigating the link  
11  
12 between asthma and risk of death from cardiovascular disease. Despite the large study size,  
13  
14 the objective measures of lung function that allowed us to exclude possible misclassification  
15  
16 of asthma with COPD, and the wide range of potential confounders included in our models,  
17  
18 the limitations of this study must be considered.  
19

20  
21 There is no gold standard for asthma diagnosis and despite using spirometry measures  
22  
23 to exclude possible COPD, asthma in this study was confirmed based on self-report from a  
24  
25 questionnaire. Additionally, we cannot rule out the potential misdiagnosis of heart disease as  
26  
27 asthma. Among those diagnosed with asthma, we were unable to separate asthma patients by  
28  
29 disease onset (i.e., childhood vs. adulthood), and it is possible that childhood asthma and adult  
30  
31 onset asthma differs in regard to asthma triggers,(37) gender distribution(37) and systemic  
32  
33 inflammation(38). Thus our observations may not be representative of these subgroups.  
34

35  
36 Taiwan and some other East Asian countries such as Japan and Hong Kong have some  
37  
38 of the lowest mortality rates from CVD in the world(39, 40). Furthermore, our sample was  
39  
40 fairly young (mean age 40.4 years), and these may have contributed to the relatively small  
41  
42 number of CVD deaths in our study. This may have reduced our power to detect any small  
43  
44 effects of asthma on risk of CVD death.  
45

46  
47 Observational studies inherently limit causal inference. Although we adjusted for a  
48  
49 number of potential confounders in our analyses, there is a possibility of uncontrolled  
50  
51 confounding contributing to the observed associations. However, any residual confounding  
52  
53 would need to be strongly associated with both asthma and CVD mortality and be unrelated to  
54  
55 the covariates included in our models.  
56  
57

1  
2  
3 Finally, the sample was from a health check-up programme run by a private company  
4 and the participants may have come from a somewhat more advantaged socioeconomic  
5 position than Taiwan's general population and therefore our findings may not be  
6 representative of the general population. However, the cohort was similar to the general  
7 population reported in a national survey(41) in terms of certain characteristics including the  
8 prevalence of smoking.  
9  
10  
11  
12  
13  
14

## 15 16 **CONCLUSION**

17  
18 Our study suggests that asthma, particularly active asthma, may have adverse cardiovascular  
19 consequences. For deaths from CVD and stroke, the association was stronger in men than in  
20 women. The associations persisted even after adjustment for established CVD risk factors.  
21  
22 Further studies are needed to elucidate better the mechanisms underlying this association and  
23 to explain sex difference in the association.  
24  
25  
26  
27  
28  
29

## 30 31 **ACKNOWLEDGEMENTS**

32  
33 Raw data used for analysis in this research were provided by MJ Health Resource Center  
34 (Authorization Code: MJHRFB2014001C). The MJ Health Resource Foundation is  
35 responsible for the data distribution. Any interpretation or conclusions drawn from the  
36 research analysis do not represent the views of MJ Health Resource Center.  
37  
38  
39  
40  
41  
42

## 43 44 **COMPETING INTERESTS**

45  
46 None declared.  
47  
48

## 49 50 **FUNDING**

1  
2  
3 This work was supported by funding for the Liaison Committee between the Central Norway  
4 Regional Health Authority and the Norwegian University of Science and Technology awarded  
5 to Linn B. Strand and Ben M Brumpton.  
6  
7  
8  
9

## 10 **CONTRIBUTIONS**

11  
12 LBS wrote the analysis plan and wrote the first draft of the manuscript. MKT did the data  
13 analysis. CPW supervised the work and reviewed the manuscript. SSC helped supervise the  
14 work, reviewed the manuscript and coordinated the collaboration between the researchers.  
15 BMB designed the study, helped write the analysis plan, wrote the methods section of the  
16 manuscript and reviewed the manuscript. All authors confirm that they have reviewed and  
17 approved the final version of the manuscript.  
18  
19  
20  
21  
22  
23  
24  
25

## 26 **DATA SHARING STATEMENT**

27  
28  
29 No additional data are available.  
30  
31  
32  
33  
34  
35  
36  
37  
38  
39  
40  
41  
42  
43  
44  
45  
46  
47  
48  
49  
50  
51  
52  
53  
54  
55  
56  
57  
58  
59  
60

## References

1. McKay J, Mensah GA, Greenlund K. The atlas of heart disease and stroke: World Health Organization; 2004.
2. Global asthma network. The global asthma report 2014 2014. Available from: <http://www.globalasthmareport.org/>.
3. Wouters EF, Reynaert NL, Dentener MA, Vernooij JH. Systemic and local inflammation in asthma and chronic obstructive pulmonary disease: is there a connection? *Proc Am Thorac Soc*. 2009;6(8):638-47.
4. Koenig W, Sund M, Fröhlich M, Fischer H-G, Löwel H, Döring A, et al. C-reactive protein, a sensitive marker of inflammation, predicts future risk of coronary heart disease in initially healthy middle-aged men results from the MONICA (Monitoring Trends and Determinants in Cardiovascular Disease) Augsburg Cohort Study, 1984 to 1992. *Circulation*. 1999;99(2):237-42.
5. Schanen J, Iribarren C, Shahar E, Punjabi N, Rich S, Sorlie P, et al. Asthma and incident cardiovascular disease: the Atherosclerosis Risk in Communities Study. *Thorax*. 2005;60(8):633-8.
6. Iribarren C, Tolstykh IV, Eisner MD. Are patients with asthma at increased risk of coronary heart disease? *Int J Epidemiol*. 2004;33(4):743-8.
7. Onufrak SJ, Abramson JL, Austin HD, Holguin F, McClellan WM, Vaccarino LV. Relation of adult-onset asthma to coronary heart disease and stroke. *Am J Cardiol*. 2008;101(9):1247-52.
8. Chang S-S, Wen CP, Tsai MK, Lawlor DA, Yang YC, Gunnell D. Adiposity, its related biologic risk factors, and suicide: a cohort study of 542,088 Taiwanese adults. *Am J Epidemiol*. 2012;175(8):804-15.
9. Toren K, Brisman J, Jarvholm B. Asthma and asthma-like symptoms in adults assessed by questionnaires. A literature review. *Chest*. 1993;104(2):600-8.
10. de Marco R, Cerveri I, Bugiani M, Ferrari M, Verlato G. An undetected burden of asthma in Italy: the relationship between clinical and epidemiological diagnosis of asthma. *Eur Respir J*. 1998;11(3):599-605.
11. Cazzola M, Calzetta L, Bettoncelli G, Cricelli C, Romeo F, Matera MG, et al. Cardiovascular disease in asthma and COPD: a population-based retrospective cross-sectional study. *Respir Med*. 2012;106(2):249-56.
12. Appleton SL, Ruffin RE, Wilson DH, Taylor AW, Adams RJ. Asthma is associated with cardiovascular disease in a representative population sample. *Obesity Research & Clinical Practice*. 2008;2(2):91-9.
13. Roger VL. Epidemiology of myocardial infarction. *Med Clin N Am*. 2007;91(4):537-52.
14. Toren K, Lindholm NB. Do patients with severe asthma run an increased risk from ischaemic heart disease? *Int J Epidemiol*. 1996;25(3):617-20.
15. Musk A, Ryan G, Perera D, D'Souza B, Hockey R, Hobbs M. Mortality from asthma in Western Australia. *Med J Australia*. 1987;147(9):423-7.
16. Iribarren C, Tolstykh IV, Miller MK, Sobel E, Eisner MD. Adult asthma and risk of coronary heart disease, cerebrovascular disease, and heart failure: a prospective study of 2 matched cohorts. *Am J Epidemiol*. 2012:kws181.
17. Becklake MR, Kauffmann F. Gender differences in airway behaviour over the human life span. *Thorax*. 1999;54(12):1119-38.
18. Wen L-y, Ni H, Li K-s, Yang H-h, Cheng J, Wang X, et al. Asthma and Risk of Stroke: A Systematic Review and Meta-analysis. *J Stroke Cerebrovasc*. 2016;25(3):497-503.
19. Ishmael FT. The inflammatory response in the pathogenesis of asthma. *J Am Osteopath Assoc*. 2011;111(11\_suppl\_7):S11-S7.
20. Willerson JT, Ridker PM. Inflammation as a Cardiovascular Risk Factor. *Circulation*. 2004;109(21 suppl 1):II-2-II-10.
21. Arif AA, Delclos GL, COLMER-HAMOOD J. Association between asthma, asthma symptoms and C-reactive protein in US adults: Data from the national health and nutrition examination survey, 1999–2002. *Respirology*. 2007;12(5):675-82.
22. Kaptoge S, Angelantonio ED, Collaboration ERF. C-reactive protein concentration and risk of coronary heart disease, stroke, and mortality: an individual participant meta-analysis. *Lancet*. 2010;375(9709):132-40.

23. Liu Y, Wang J, Zhang L, Wang C, Wu J, Zhou Y, et al. Relationship between C-reactive protein and stroke: a large prospective community based study. *PLoS ONE*. 2014;9(9):e107017.
24. Hozawa A, Billings JL, Shahar E, Ohira T, Rosamond WD, Folsom AR. Lung function and ischemic stroke incidence: the Atherosclerosis Risk in Communities study. *CHEST Journal*. 2006;130(6):1642-9.
25. Gulsvik AK, Gulsvik A, Skovlund E, Thelle DS, Mowé M, Humerfelt S, et al. The association between lung function and fatal stroke in a community followed for 4 decades. *J Epidemiol Commun H*. 2012;66(11):1030-6.
26. Tamagawa E, van Eeden SF. Impaired lung function and risk for stroke: role of the systemic inflammation response? *CHEST Journal*. 2006;130(6):1631-3.
27. Kuo H-K, Yen C-J, Chang C-H, Kuo C-K, Chen J-H, Sorond F. Relation of C-reactive protein to stroke, cognitive disorders, and depression in the general population: systematic review and meta-analysis. *The Lancet Neurology*. 2005;4(6):371-80.
28. James AL, Palmer LJ, Kicic E, Maxwell PS, Lagan SE, Ryan GF, et al. Decline in lung function in the Busselton Health Study: the effects of asthma and cigarette smoking. *Am J Respir Crit Care Med*. 2005;171(2):109-14.
29. O'Byrne PM, Pedersen S, Lamm CJ, Tan WC, Busse WW. Severe exacerbations and decline in lung function in asthma. *Am J Respir Crit Care Med*. 2009;179(1):19-24.
30. Au DH, Curtis JR, Every NR, McDonnell MB, Fihn SD. Association between inhaled  $\beta$ -agonists and the risk of unstable angina and myocardial infarction. *Chest*. 2002;121(3):846-51.
31. Au DH, Lemaitre RN, Randall Curtis J, Smith NL, Psaty BM. The risk of myocardial infarction associated with inhaled  $\beta$ -adrenoceptor agonists. *Am J Respir Crit Care Med*. 2000;161(3):827-30.
32. Brumpton B, Langhammer A, Romundstad P, Chen Y, Mai X-M. General and abdominal obesity and incident asthma in adults: the HUNT study. *Eur Respir J*. 2013;41(2):323-9.
33. Coogan PF, Castro-Webb N, Yu J, O'Connor GT, Palmer JR, Rosenberg L. Active and passive smoking and the incidence of asthma in the Black Women's Health Study. *Am J Respir Crit Care Med*. 2015;191(2):168-76.
34. Eijkemans M, Mommers M, Jos MT, Thijs C, Prins MH. Physical activity and asthma: a systematic review and meta-analysis. *PLoS ONE*. 2012;7(12):e50775.
35. Howard BV, Cowan LD, Go O, Welty TK, Robbins DC, Lee ET, et al. Adverse effects of diabetes on multiple cardiovascular disease risk factors in women: the Strong Heart Study. *Diabetes Care*. 1998;21(8):1258-65.
36. Ehrlich SF, Quesenberry CP, Van Den Eeden SK, Shan J, Ferrara A. Patients Diagnosed With Diabetes Are at Increased Risk for Asthma, Chronic Obstructive Pulmonary Disease, Pulmonary Fibrosis, and Pneumonia but Not Lung Cancer. *Diabetes Care*. 2010;33(1):55-60.
37. Wenzel SE. Asthma: defining of the persistent adult phenotypes. *Lancet*. 2006;368(9537):804-13.
38. Ólafsdóttir IS, Gislason T, Thjodleifsson B, Ólafsson Í, Gislason D, Jögi R, et al. C reactive protein levels are increased in non-allergic but not allergic asthma: a multicentre epidemiological study. *Thorax*. 2005;60(6):451-4.
39. Cheng Y, Chen K-J, Wang C-J, Chan S-H, Chang W-C, Chen J-H. Secular trends in coronary heart disease mortality, hospitalization rates, and major cardiovascular risk factors in Taiwan, 1971–2001. *Int J Cardiol*. 2005;100(1):47-52.
40. Finegold JA, Asaria P, Francis DP. Mortality from ischaemic heart disease by country, region, and age: statistics from World Health Organisation and United Nations. *Int J Cardiol*. 2013;168(2):934-45.
41. Wen CP, Levy DT, Cheng TY, Hsu C-C, Tsai SP. Smoking behaviour in Taiwan, 2001. *Tob Control*. 2005;14(suppl 1):i51-i5.



Supplementary Table 1. Hazard ratios (HRs) for the association of asthma with cardiovascular disease (CVD), coronary heart disease (CHD), and stroke mortality by age in the MJ health check-up programme, Taiwan

|                                             | N       | CVD mortality |                     |                   |        |                   |        | CHD mortality |                     |                   |        |                   |        | Stroke mortality |                     |                   |        |                   |        |
|---------------------------------------------|---------|---------------|---------------------|-------------------|--------|-------------------|--------|---------------|---------------------|-------------------|--------|-------------------|--------|------------------|---------------------|-------------------|--------|-------------------|--------|
|                                             |         | Cases (n)     | Rate per 100,000 PY | Model 1           |        | Model 2           |        | Cases (n)     | Rate per 100,000 PY | Model 1           |        | Model 2           |        | Cases (n)        | Rate per 100,000 PY | Model 1           |        | Model 2           |        |
|                                             |         |               |                     | HR                | 95% CI | HR                | 95% CI |               |                     | HR                | 95% CI | HR                | 95% CI |                  |                     | HR                | 95% CI | HR                | 95% CI |
| <60 years                                   |         |               |                     |                   |        |                   |        |               |                     |                   |        |                   |        |                  |                     |                   |        |                   |        |
| No asthma                                   | 384,436 | 802           | 22                  | 1.00              |        | 1.00              |        | 186           | 5                   | 1.00              |        | 1.00              |        | 319              | 9                   | 1.00              |        | 1.00              |        |
| Asthma                                      | 12,392  | 34            | 32                  | 1.30 (0.92 ,1.84) |        | 1.18 (0.84 ,1.66) |        | 11            | 10                  | 1.76 (0.96 ,3.24) |        | 1.54 (0.84 ,2.85) |        | 12               | 11                  | 1.16 (0.65 ,2.06) |        | 1.10 (0.62 ,1.97) |        |
| Non-active asthma (history only)            | 10,237  | 18            | 21                  | 0.99 (0.62 ,1.58) |        | 0.97 (0.61 ,1.54) |        | 6             | 7                   | 1.40 (0.62 ,3.15) |        | 1.32 (0.58 ,2.97) |        | 6                | 7                   | 0.83 (0.37 ,1.87) |        | 0.86 (0.39 ,1.94) |        |
| Active asthma (current drug use)            | 2,155   | 16            | 76                  | 2.02 (1.23 ,3.31) |        | 1.57 (0.96 ,2.58) |        | 5             | 24                  | 2.57 (1.06 ,6.26) |        | 1.95 (0.80 ,4.78) |        | 6                | 29                  | 1.89 (0.84 ,4.24) |        | 1.53 (0.68 ,3.44) |        |
| >=60 years                                  |         |               |                     |                   |        |                   |        |               |                     |                   |        |                   |        |                  |                     |                   |        |                   |        |
| No asthma                                   | 46,993  | 1,961         | 421                 | 1.00              |        | 1.00              |        | 544           | 117                 | 1.00              |        | 1.00              |        | 759              | 163                 | 1.00              |        | 1.00              |        |
| Asthma                                      | 2,525   | 148           | 599                 | 1.27 (1.07 ,1.50) |        | 1.13 (0.95 ,1.33) |        | 39            | 158                 | 1.20 (0.87 ,1.66) |        | 1.02 (0.73 ,1.41) |        | 56               | 227                 | 1.25 (0.95 ,1.64) |        | 1.16 (0.88 ,1.52) |        |
| Non-active asthma (history only)            | 1,366   | 66            | 479                 | 1.05 (0.82 ,1.34) |        | 0.97 (0.76 ,1.24) |        | 19            | 138                 | 1.09 (0.69 ,1.71) |        | 0.96 (0.61 ,1.53) |        | 29               | 211                 | 1.19 (0.82 ,1.73) |        | 1.14 (0.79 ,1.65) |        |
| Active asthma (current drug use)            | 1,159   | 82            | 749                 | 1.52 (1.22 ,1.90) |        | 1.30 (1.04 ,1.63) |        | 20            | 183                 | 1.33 (0.85 ,2.08) |        | 1.07 (0.68 ,1.68) |        | 27               | 247                 | 1.31 (0.89 ,1.92) |        | 1.18 (0.80 ,1.74) |        |
| Age interaction p                           |         |               |                     |                   |        |                   |        |               |                     |                   |        |                   |        |                  |                     |                   |        |                   |        |
| Asthma (yes/no)                             |         |               |                     | 0.85              |        | 0.50              |        |               |                     | 0.25              |        | 0.15              |        |                  |                     | 0.85              |        | 1.00              |        |
| Asthma (no, history only, history and drug) |         |               |                     | 0.079             |        | 0.32              |        |               |                     | 0.15              |        | 0.22              |        |                  |                     | 0.18              |        | 0.49              |        |

PY: person-years  
Model 1: adjust for sex  
Model 2: adjust for sex education, marital status, smoking, alcohol consumption, physical activity, diabetes, hypertension, body mass index, total cholesterol, triglyceride, history of heart disease/heart surgery/use of heart drug, and history of stroke

**Supplementary table 2. Hazard ratios (HRs) for the association of asthma with cardiovascular disease (CVD), coronary heart disease (CHD), and stroke mortality, excluding deaths<sup>a</sup> occurring during the two first years of follow-up, in the MJ health check-up programme, Taiwan**

|                                  | N <sup>a</sup> | CVD mortality |         |              |         |              | CHD mortality |         |              |         | Stroke mortality |           |         |              |         |              |
|----------------------------------|----------------|---------------|---------|--------------|---------|--------------|---------------|---------|--------------|---------|------------------|-----------|---------|--------------|---------|--------------|
|                                  |                | Cases (n)     | Model 1 |              | Model 2 |              | Cases (n)     | Model 1 |              | Model 2 |                  | Cases (n) | Model 1 |              | Model 2 |              |
|                                  |                |               | HR      | (95% CI)     | HR      | 95% CI       |               | HR      | 95% CI       | HR      | 95% CI           |           | HR      | 95% CI       | HR      | 95% CI       |
| No asthma                        | 431,200        | 2,534         | 1.00    |              | 1.00    |              | 661           | 1.00    |              | 1.00    |                  | 988       | 1.00    |              | 1.00    |              |
| Asthma                           | 14,896         | 161           | 1.23    | (1.05 ,1.44) | 1.10    | (0.94 ,1.29) | 44            | 1.26    | (0.93 ,1.71) | 1.07    | (0.79 ,1.46)     | 60        | 1.18    | (0.91 ,1.53) | 1.10    | (0.85 ,1.44) |
| Non-active asthma (history only) | 11,597         | 78            | 1.05    | (0.84 ,1.32) | 0.98    | (0.78 ,1.23) | 22            | 1.13    | (0.74 ,1.72) | 1.01    | (0.66 ,1.54)     | 33        | 1.14    | (0.81 ,1.61) | 1.11    | (0.78 ,1.57) |
| Active asthma (current drug use) | 3,299          | 83            | 1.47    | (1.18 ,1.83) | 1.24    | (1.00 ,1.55) | 22            | 1.46    | (0.98 ,2.17) | 1.15    | (0.75 ,1.76)     | 27        | 1.23    | (0.84 ,1.80) | 1.10    | (0.75 ,1.62) |

Model 1: adjust for age and sex

Model 2: adjust for age, education, marital status, smoking, alcohol consumption, physical activity, diabetes, hypertension, body mass index, total cholesterol, triglyceride, history of heart disease/heart surgery/use of heart drug, and history of stroke

<sup>a</sup> The number of deaths due to CVD, CHD, and stroke varied and thus the total number of participants after excluding deaths due to each of three causes differed.

**Supplementary Table 3. Hazard ratios (HRs) for the association of asthma with cardiovascular disease (CVD), coronary heart disease (CHD), and stroke mortality, excluding individuals with history of heart disease / heart surgery / use of heart drug, and history of stroke at baseline, in the MJ health check-up programme, Taiwan**

|                                  | N       | CVD mortality |         |              |         |              | CHD mortality |         |              |         | Stroke mortality |           |         |              |         |              |
|----------------------------------|---------|---------------|---------|--------------|---------|--------------|---------------|---------|--------------|---------|------------------|-----------|---------|--------------|---------|--------------|
|                                  |         | Cases (n)     | Model 1 |              | Model 2 |              | Cases (n)     | Model 1 |              | Model 2 |                  | Cases (n) | Model 1 |              | Model 2 |              |
|                                  |         |               | HR      | (95% CI)     | HR      | 95% CI       |               | HR      | 95% CI       | HR      | 95% CI           |           | HR      | 95% CI       | HR      | 95% CI       |
| No asthma                        | 414,859 | 1,992         | 1.00    |              | 1.00    |              | 514           | 1.00    |              | 1.00    |                  | 823       | 1.00    |              | 1.00    |              |
| Asthma                           | 13,802  | 108           | 1.16    | (0.96 ,1.41) | 1.15    | (0.95 ,1.39) | 23            | 0.94    | (0.62 ,1.43) | 0.92    | (0.60 ,1.40)     | 42        | 1.10    | (0.81 ,1.50) | 1.09    | (0.80 ,1.49) |
| Non-active asthma (history only) | 10,935  | 51            | 0.94    | (0.71 ,1.25) | 0.95    | (0.72 ,1.26) | 13            | 0.92    | (0.53 ,1.60) | 0.91    | (0.52 ,1.58)     | 21        | 0.94    | (0.61 ,1.45) | 0.97    | (0.63 ,1.50) |
| Active asthma (current drug use) | 2,867   | 57            | 1.47    | (1.13 ,1.92) | 1.41    | (1.08 ,1.84) | 10            | 0.96    | (0.52 ,1.80) | 0.93    | (0.50 ,1.75)     | 21        | 1.32    | (0.85 ,2.03) | 1.25    | (0.81 ,1.93) |

Model 1: adjust for age and sex  
 Model 2: adjust for age, education, marital status, smoking, alcohol consumption, physical activity, diabetes, hypertension, body mass index, total cholesterol and triglycerides.

**Supplementary table 4. Hazard ratios (HRs) for the association of asthma with cardiovascular disease (CVD), coronary heart disease (CHD), and stroke mortality, excluding individuals with FEV1/FCV < 0.7 at baseline, in the MJ health check-up programme, Taiwan**

|                                  | N       | CVD mortality |         |              |         | CHD mortality |           |         |              | Stroke mortality |              |           |         |              |         |              |
|----------------------------------|---------|---------------|---------|--------------|---------|---------------|-----------|---------|--------------|------------------|--------------|-----------|---------|--------------|---------|--------------|
|                                  |         | Cases (n)     | Model 1 |              | Model 2 |               | Cases (n) | Model 1 |              | Model 2          |              | Cases (n) | Model 1 |              | Model 2 |              |
|                                  |         |               | HR      | 95% CI       | HR      | 95% CI        |           | HR      | 95% CI       | HR               | 95% CI       |           | HR      | 95% CI       | HR      | 95% CI       |
| No asthma                        | 352,774 | 2,319         | 1.00    |              | 1.00    |               | 617       | 1.00    |              | 1.00             |              | 902       | 1.00    |              | 1.00    |              |
| Asthma                           | 11,074  | 117           | 1.27    | (1.06 ,1.53) | 1.12    | (0.93 ,1.36)  | 32        | 1.29    | (0.90 ,1.84) | 1.08             | (0.76 ,1.55) | 46        | 1.29    | (0.96 ,1.73) | 1.21    | (0.90 ,1.63) |
| Non-active asthma (history only) | 8,835   | 60            | 1.05    | (0.81 ,1.36) | 0.98    | (0.76 ,1.27)  | 19        | 1.25    | (0.79 ,1.97) | 1.11             | (0.70 ,1.76) | 25        | 1.13    | (0.76 ,1.68) | 1.11    | (0.75 ,1.66) |
| Active asthma (current drug use) | 2,239   | 57            | 1.62    | (1.25 ,2.11) | 1.33    | (1.02 ,1.73)  | 13        | 1.36    | (0.78 ,2.35) | 1.05             | (0.60 ,1.82) | 21        | 1.55    | (1.01 ,2.39) | 1.36    | (0.88 ,2.10) |

Model 1: adjust for age and sex

Model 2: adjust for age, education, marital status, smoking, alcohol consumption, physical activity, diabetes, hypertension, body mass index, total cholesterol, triglyceride, history of heart disease/heart surgery/use of heart drug, and history of stroke

Supplementary Table 5. Hazard ratios (HRs) for the association of asthma with cardiovascular disease (CVD), coronary heart disease (CHD), and stroke mortality by smoking status in the MJ health check-up programme, Taiwan

|                                             | N       | CVD mortality |         |              |         | CHD mortality |           |         |              | Stroke mortality |              |           |         |              |         |              |
|---------------------------------------------|---------|---------------|---------|--------------|---------|---------------|-----------|---------|--------------|------------------|--------------|-----------|---------|--------------|---------|--------------|
|                                             |         | Cases (n)     | Model 1 |              | Model 2 |               | Cases (n) | Model 1 |              | Model 2          |              | Cases (n) | Model 1 |              | Model 2 |              |
|                                             |         |               | HR      | 95% CI       | HR      | 95% CI        |           | HR      | 95% CI       | HR               | 95% CI       |           | HR      | 95% CI       | HR      | 95% CI       |
| Non or ex-smoker                            |         |               |         |              |         |               |           |         |              |                  |              |           |         |              |         |              |
| No asthma                                   | 332,699 | 1,898         | 1.00    |              | 1.00    | 470           | 1.00      |         | 1.00         | 754              | 1.00         |           | 1.00    |              |         |              |
| Asthma                                      | 11,456  | 113           | 1.15    | (0.95, 1.39) | 1.04    | (0.86, 1.25)  | 30        | 1.20    | (0.83, 1.73) | 1.03             | (0.71, 1.50) | 40        | 1.03    | (0.75, 1.42) | 0.98    | (0.71, 1.35) |
| Non-active asthma (history only)            | 9,018   | 56            | 1.00    | (0.77, 1.31) | 0.94    | (0.72, 1.23)  | 16        | 1.15    | (0.70, 1.89) | 1.04             | (0.63, 1.72) | 24        | 1.09    | (0.72, 1.63) | 1.07    | (0.71, 1.61) |
| Active asthma (current drug use)            | 2,438   | 57            | 1.33    | (1.02, 1.74) | 1.14    | (0.88, 1.49)  | 14        | 1.26    | (0.74, 2.14) | 1.02             | (0.60, 1.75) | 16        | 0.96    | (0.59, 1.58) | 0.87    | (0.53, 1.43) |
| Current smoker                              |         |               |         |              |         |               |           |         |              |                  |              |           |         |              |         |              |
| No asthma                                   | 98,730  | 865           | 1.00    |              | 1.00    | 260           | 1.00      |         | 1.00         | 324              | 1.00         |           | 1.00    |              |         |              |
| Asthma                                      | 3,461   | 69            | 1.55    | (1.21, 1.98) | 1.34    | (1.04, 1.71)  | 20        | 1.45    | (0.92, 2.29) | 1.20             | (0.75, 1.90) | 28        | 1.67    | (1.13, 2.45) | 1.51    | (1.02, 2.23) |
| Non-active asthma (history only)            | 2,585   | 28            | 1.13    | (0.78, 1.65) | 1.01    | (0.69, 1.48)  | 9         | 1.18    | (0.61, 2.30) | 1.01             | (0.52, 1.97) | 11        | 1.19    | (0.65, 2.17) | 1.11    | (0.61, 2.04) |
| Active asthma (current drug use)            | 876     | 41            | 2.07    | (1.51, 2.84) | 1.72    | (1.25, 2.36)  | 11        | 1.78    | (0.97, 3.25) | 1.41             | (0.77, 2.60) | 17        | 2.26    | (1.38, 3.69) | 1.97    | (1.20, 3.23) |
| Smoking status interaction p                |         |               |         |              |         |               |           |         |              |                  |              |           |         |              |         |              |
| Asthma (yes/no)                             |         |               |         |              | 0.18    |               |           |         |              | 0.74             |              |           |         |              | 0.12    |              |
| Asthma (no, history only, history and drug) |         |               |         |              | 0.27    |               |           |         |              | 0.82             |              |           |         |              | 0.088   |              |

Model 1: adjust for age  
Model 2: adjust for age, education, marital status, alcohol consumption, physical activity, diabetes, hypertension, body mass index, total cholesterol, triglyceride, history of heart disease/heart surgery/use of heart drug, and history of stroke

**STROBE 2007 (v4) Statement—Checklist of items that should be included in reports of *cohort studies***

| Section/Topic                | Item # | Recommendation                                                                                                                                                                       | Reported on page # |
|------------------------------|--------|--------------------------------------------------------------------------------------------------------------------------------------------------------------------------------------|--------------------|
| Title and abstract           | 1      | (a) Indicate the study's design with a commonly used term in the title or the abstract                                                                                               | 3                  |
|                              |        | (b) Provide in the abstract an informative and balanced summary of what was done and what was found                                                                                  | 3                  |
| <b>Introduction</b>          |        |                                                                                                                                                                                      |                    |
| Background/rationale         | 2      | Explain the scientific background and rationale for the investigation being reported                                                                                                 | 5                  |
| Objectives                   | 3      | State specific objectives, including any prespecified hypotheses                                                                                                                     | 5                  |
| <b>Methods</b>               |        |                                                                                                                                                                                      |                    |
| Study design                 | 4      | Present key elements of study design early in the paper                                                                                                                              | 6                  |
| Setting                      | 5      | Describe the setting, locations, and relevant dates, including periods of recruitment, exposure, follow-up, and data collection                                                      | 6                  |
| Participants                 | 6      | (a) Give the eligibility criteria, and the sources and methods of selection of participants. Describe methods of follow-up                                                           | 6                  |
|                              |        | (b) For matched studies, give matching criteria and number of exposed and unexposed                                                                                                  | NA                 |
| Variables                    | 7      | Clearly define all outcomes, exposures, predictors, potential confounders, and effect modifiers. Give diagnostic criteria, if applicable                                             | 6,7                |
| Data sources/<br>measurement | 8*     | For each variable of interest, give sources of data and details of methods of assessment (measurement). Describe comparability of assessment methods if there is more than one group | 6,7                |
| Bias                         | 9      | Describe any efforts to address potential sources of bias                                                                                                                            | 8,9                |
| Study size                   | 10     | Explain how the study size was arrived at                                                                                                                                            | 6                  |
| Quantitative variables       | 11     | Explain how quantitative variables were handled in the analyses. If applicable, describe which groupings were chosen and why                                                         | 8,9                |
| Statistical methods          | 12     | (a) Describe all statistical methods, including those used to control for confounding                                                                                                | 8,9                |
|                              |        | (b) Describe any methods used to examine subgroups and interactions                                                                                                                  | 8                  |
|                              |        | (c) Explain how missing data were addressed                                                                                                                                          | 6                  |
|                              |        | (d) If applicable, explain how loss to follow-up was addressed                                                                                                                       | NA                 |
|                              |        | (e) Describe any sensitivity analyses                                                                                                                                                | 8,9                |
| <b>Results</b>               |        |                                                                                                                                                                                      |                    |

|                          |     |                                                                                                                                                                                                              |       |
|--------------------------|-----|--------------------------------------------------------------------------------------------------------------------------------------------------------------------------------------------------------------|-------|
| Participants             | 13* | (a) Report numbers of individuals at each stage of study—eg numbers potentially eligible, examined for eligibility, confirmed eligible, included in the study, completing follow-up, and analysed            | 6     |
|                          |     | (b) Give reasons for non-participation at each stage                                                                                                                                                         | 6     |
|                          |     | (c) Consider use of a flow diagram                                                                                                                                                                           | NA    |
| Descriptive data         | 14* | (a) Give characteristics of study participants (eg demographic, clinical, social) and information on exposures and potential confounders                                                                     | 9     |
|                          |     | (b) Indicate number of participants with missing data for each variable of interest                                                                                                                          | 6     |
|                          |     | (c) Summarise follow-up time (eg, average and total amount)                                                                                                                                                  | 6     |
| Outcome data             | 15* | Report numbers of outcome events or summary measures over time                                                                                                                                               | 10    |
| Main results             | 16  | (a) Give unadjusted estimates and, if applicable, confounder-adjusted estimates and their precision (eg, 95% confidence interval). Make clear which confounders were adjusted for and why they were included | 10    |
|                          |     | (b) Report category boundaries when continuous variables were categorized                                                                                                                                    | 7,8   |
|                          |     | (c) If relevant, consider translating estimates of relative risk into absolute risk for a meaningful time period                                                                                             |       |
| Other analyses           | 17  | Report other analyses done—eg analyses of subgroups and interactions, and sensitivity analyses                                                                                                               | 14    |
| <b>Discussion</b>        |     |                                                                                                                                                                                                              |       |
| Key results              | 18  | Summarise key results with reference to study objectives                                                                                                                                                     | 15    |
| <b>Limitations</b>       |     |                                                                                                                                                                                                              |       |
| Interpretation           | 20  | Give a cautious overall interpretation of results considering objectives, limitations, multiplicity of analyses, results from similar studies, and other relevant evidence                                   | 15-18 |
| Generalisability         | 21  | Discuss the generalisability (external validity) of the study results                                                                                                                                        | 19    |
| <b>Other information</b> |     |                                                                                                                                                                                                              |       |
| Funding                  | 22  | Give the source of funding and the role of the funders for the present study and, if applicable, for the original study on which the present article is based                                                | 20    |

\*Give information separately for cases and controls in case-control studies and, if applicable, for exposed and unexposed groups in cohort and cross-sectional studies.

**Note:** An Explanation and Elaboration article discusses each checklist item and gives methodological background and published examples of transparent reporting. The STROBE checklist is best used in conjunction with this article (freely available on the Web sites of PLoS Medicine at <http://www.plosmedicine.org/>, Annals of Internal Medicine at <http://www.annals.org/>, and Epidemiology at <http://www.epidem.com/>). Information on the STROBE Initiative is available at [www.strobe-statement.org](http://www.strobe-statement.org).

# BMJ Open

## Asthma and cardiovascular disease mortality: a cohort study of 446 346 Taiwanese adults

|                                 |                                                                                                                                                                                                                                                                                                                                                                                                                                                                                                                                                                                                                                                                                                                                                                                                                                                                          |
|---------------------------------|--------------------------------------------------------------------------------------------------------------------------------------------------------------------------------------------------------------------------------------------------------------------------------------------------------------------------------------------------------------------------------------------------------------------------------------------------------------------------------------------------------------------------------------------------------------------------------------------------------------------------------------------------------------------------------------------------------------------------------------------------------------------------------------------------------------------------------------------------------------------------|
| Journal:                        | <i>BMJ Open</i>                                                                                                                                                                                                                                                                                                                                                                                                                                                                                                                                                                                                                                                                                                                                                                                                                                                          |
| Manuscript ID                   | bmjopen-2017-019992.R1                                                                                                                                                                                                                                                                                                                                                                                                                                                                                                                                                                                                                                                                                                                                                                                                                                                   |
| Article Type:                   | Research                                                                                                                                                                                                                                                                                                                                                                                                                                                                                                                                                                                                                                                                                                                                                                                                                                                                 |
| Date Submitted by the Author:   | 11-Jan-2018                                                                                                                                                                                                                                                                                                                                                                                                                                                                                                                                                                                                                                                                                                                                                                                                                                                              |
| Complete List of Authors:       | Strand, Linn Beate; Norges teknisk-naturvitenskapelige universitet, Department of Public Health and Nursing<br>Tsai, Min; College of Public Health, National Taiwan University, Institute of Epidemiology and Preventive Medicine; China Medical University Hospital, Taiwan and Institute of Population Health Science, National Health Research Institutes<br>Wen, Chi-Pang ; National Health Research Institutes, Taiwan and Institute of Population Health Science; China Medical University Hospital<br>Chang, Shu-Sen; National Taiwan University, Institute of Health Behaviors and Community Sciences and Department of Public Health<br>Brumpton, Ben; St Olav Hospital, Department of Thoracic and Occupational Medicine; Norwegian University of Science and Technology, K.G. Jebsen Center for Genetic Epidemiology, Department of Public Health and Nursing |
| <b>Primary Subject Heading</b>: | Epidemiology                                                                                                                                                                                                                                                                                                                                                                                                                                                                                                                                                                                                                                                                                                                                                                                                                                                             |
| Secondary Subject Heading:      | Epidemiology                                                                                                                                                                                                                                                                                                                                                                                                                                                                                                                                                                                                                                                                                                                                                                                                                                                             |
| Keywords:                       | Asthma < THORACIC MEDICINE, CARDIOLOGY, EPIDEMIOLOGY                                                                                                                                                                                                                                                                                                                                                                                                                                                                                                                                                                                                                                                                                                                                                                                                                     |
|                                 |                                                                                                                                                                                                                                                                                                                                                                                                                                                                                                                                                                                                                                                                                                                                                                                                                                                                          |

SCHOLARONE™  
Manuscripts

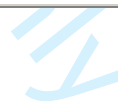



1  
2  
3  
4 **Asthma and cardiovascular disease mortality: a cohort study of 446 346 Taiwanese**  
5 **adults**  
6  
7

8  
9 **Author names:**

10  
11 Linn B. Strand, PhD <sup>a</sup>, Min Kuang Tsai, MS <sup>b,c</sup>, Chi Pang Wen, MD, PhD <sup>\*c</sup>, Shu-Sen Chang,  
12  
13 MD, PhD <sup>\*d</sup>, Ben M. Brumpton, PhD <sup>e</sup>  
14  
15

16  
17  
18 <sup>a</sup>**Affiliation:** Department of Public Health and Nursing, Norwegian University of Science and  
19  
20 Technology, Hakon Jarls gate 11, 7495 Trondheim, Norway.  
21  
22

23  
24 <sup>b</sup>**Affiliations:** Institute of Epidemiology and Preventive Medicine, College of Public Health,  
25  
26 National Taiwan University, No 17, Xu-Zhou Road, Taipei City 10055, Taiwan.  
27  
28

29  
30 <sup>c</sup> **Affiliations:** China Medical University Hospital, 91 Hsueh-Shih Road, Taichung 40402,  
31  
32 Taiwan and Institute of Population Health Science, National Health Research Institutes, 35  
33  
34 Keyan Road, Zhunan Town, Miaoli County 350, Taiwan.  
35  
36

37  
38 <sup>d</sup> **Affiliation:** Institute of Health Behaviors and Community Sciences and Department of  
39  
40 Public Health, College of Public Health, National Taiwan University, No 17, Xu-Zhou Road,  
41  
42 Taipei City 10055, Taiwan.  
43  
44

45  
46 <sup>e</sup> **Affiliations:** Department of Thoracic and Occupational Medicine, St Olav Hospital,  
47  
48 Prinsesse Kristinas gate 3, 7030 Trondheim, K.G. Jebsen Center for Genetic Epidemiology,  
49  
50 Department of Public Health and Nursing, Faculty of Medicine and Health Sciences,  
51  
52 Norwegian University of Science and Technology, NTNU, Trondheim, Hakon Jarls gate 11,  
53  
54 7495 Trondheim, Norway. MRC Integrative Epidemiology Unit, University of Bristol, UK  
55  
56  
57  
58  
59  
60

1  
2  
3 **\*Correspondence to:**  
4

5 Chi Pang Wen  
6

7 China Medical University Hospital, 91 Hsueh-Shih Road, Taichung City 40402, Taiwan  
8

9 Email: [cwengood@nhri.org.tw](mailto:cwengood@nhri.org.tw)  
10

11 Shu-Sen Chang  
12

13  
14 Institute of Health Behaviors and Community Sciences, College of Public Health, National  
15 Taiwan University, Taipei, Taiwan, No 17, Xu-Zhou Road, Taipei City 10055, Taiwan  
16

17  
18 Email: [shusenchang@ntu.edu.tw](mailto:shusenchang@ntu.edu.tw)  
19

20 **Key words:** Asthma, cardiology, epidemiology  
21

22  
23 **Word count:** 3337  
24  
25  
26  
27  
28  
29  
30  
31  
32  
33  
34  
35  
36  
37  
38  
39  
40  
41  
42  
43  
44  
45  
46  
47  
48  
49  
50  
51  
52  
53  
54  
55  
56  
57  
58  
59  
60

## ABSTRACT

**Objectives:** A significant proportion of cardiovascular disease (CVD) cannot be explained by well-known risk factors such as high cholesterol, hypertension and diabetes. One potential novel risk factor for CVD is asthma. We aimed to investigate the association between asthma and mortality due to cardiovascular disease.

**Design:** Prospective cohort study.

**Setting:** A large health check-up program from 1994 to 2011 in Taipei, Taiwan.

**Participants:** 446 346 Taiwanese adults. Each participant answered questions regarding asthma history (yes/no) and current daily use of asthma medications (yes/no). Active asthma was defined as those using current daily medication for asthma.

**Outcomes:** The participants were followed for mortality from CVD, coronary heart disease (CHD), and stroke obtained through linkage to the cause-of-death register until 31<sup>st</sup> December 2011.

**Results:** We found an increased risk of dying from CVD in individuals with active asthma (adjusted hazard ratio 1.32, 95 % confidence interval 1.08-1.62). The risk of death from CHD or stroke was increased in a similar manner. For deaths from CVD, CHD and stroke we found stronger associations with active asthma than non-active asthma, and for CVD and stroke stronger associations in men than women.

**Conclusion:** Our study suggests that asthma, particularly active asthma, may have adverse cardiovascular consequences.

**Word count:** 202

### Strengths and limitations of this study

- To our best knowledge this is the largest study to date on asthma and CVD mortality.
- We had objective measures of lung function that allowed us to exclude possible misclassification of asthma with COPD.
- However there is no gold standard for asthma diagnosis and asthma was confirmed based on self-report from a questionnaire.
- Finally, Taiwan has some of the lowest mortality rates from CVD in the world; our sample was young and this led to a relatively small number of CVD deaths.

## INTRODUCTION

An estimated 17 million people die of cardiovascular diseases (CVDs) every year(1). Among the main forms of CVD are coronary heart disease (CHD) and stroke(1). Some well-known factors that increase the risk of developing CVD are unfavorable cholesterol levels, high blood pressure, diabetes and cigarette smoking. A significant proportion of CVD cannot be explained by these known risk factors, and a high incidence of the diseases makes it important to detect other potentially modifiable risk factors. One novel potential risk factor is asthma. As much as 330 million adults worldwide are estimated to have asthma,(2) emphasizing the potential public health importance of any effect of asthma on the occurrence of CVD. Such an association is plausible as it is suggested that asthma is associated with low-grade systemic inflammation and decline in pulmonary function,(3) which has been linked to an increase in CVD later in life(4, 5). Despite the plausibility of such an association, only few studies have investigated the association between asthma and risk of CVD(5, 6). For example, Iribarren et al(6) recently reported a hazard ratio of 1.22 (95% confidence interval 1.14 to 1.31) for CHD related death or hospitalization in women with asthma compared with women without asthma after adjusting for demographic and established CHD risk factors; there was no association in men. To considerably strengthen the existing evidence for a causative association, there is a need for large prospective studies on asthma and the risk of CVD which can additionally investigate the influence of sex.

Approximately 5.5 million people die from stroke every year(1). Among the survivors, the consequences on physical, cognitive and emotional functioning are potentially devastating. Despite the devastating consequences of stroke, asthma as a novel risk factor has not been thoroughly investigated and only a few studies have examined this association(5, 7). Our aim was to examine whether asthma at baseline was associated with an increased risk of

1  
2  
3 deaths from CVD, and more specifically, CHD and stroke utilizing a large cohort of more  
4  
5 than 400,000 Taiwanese adults participating in a health check-up program.  
6  
7

## 8 9 **METHODS**

### 10 11 **Study population**

12  
13 The original study cohort consisted of 593,225 Taiwanese adults aged 20 years or older who  
14  
15 participated in a large health check-up program from 1994 to 2011, run by MJ Health  
16  
17 Management Institution, Taipei, Taiwan (<https://www.mjclinic.com.tw>). The baseline  
18  
19 questionnaire included questions about history of asthma and current use of asthma  
20  
21 medications. The participants went through a number of biochemical tests and physical  
22  
23 examinations as described previously(8). The study was based on 446,346 (75%) participants  
24  
25 who attended check-ups between 1998 and 2011 and who had full information on asthma,  
26  
27 asthma medications, and potential confounding variables including sociodemographic and life  
28  
29 style factors.  
30  
31  
32  
33

### 34 **Asthma**

35  
36 Participants answered questions related to asthma history (yes/no) and current daily  
37  
38 use of asthma medications (yes/no). We first defined 'ever asthma' as those reporting a  
39  
40 history of asthma or current daily use of asthma drugs, and then grouped these individuals  
41  
42 into two subgroups: 1) non-active asthma (those who only reported a history of asthma but not  
43  
44 current use of asthma medications) and; 2) active asthma (those who reported current daily  
45  
46 use of asthma medications). Self-reported asthma is commonly used in population based  
47  
48 studies; this approach has been rigorously evaluated and displays reasonable sensitivity and  
49  
50 specificity(9, 10).  
51  
52  
53

### 54 **CVD mortality**

1  
2 From baseline, the participants were followed for mortality until the end of follow-up, 31<sup>st</sup>  
3  
4 December 2011, through linkage to the Taiwanese cause-of-death register using the national  
5  
6 identification numbers. The International Classification of Diseases, Ninth Revision (ICD-9)  
7  
8 or Tenth Revision (ICD-10), codes were used to identify mortality from CVD (ICD-9 390-  
9  
10 459; ICD-10 I00-I99), CHD (ICD-9 codes 410-414; ICD-10 I20-I25), and stroke (ICD-9 430-  
11  
12 438; ICD-10 I60-I69). A previous study showed good accuracy of cause-of-death coding for  
13  
14 both heart diseases and stroke in Taiwan(11).  
15  
16

### 17 18 **Covariates**

19  
20 At the baseline health check-up participants were wearing light-weight clothes and were  
21  
22 measured barefoot. Their weight (to the nearest 0.1 kg) and height (to the nearest mm) were  
23  
24 measured using an auto-anthropometer, Nakamura KN-5000A (Nakamura, Tokyo, Japan) and  
25  
26 their body mass index (BMI) was calculated ( $\text{kg}/\text{m}^2$ ). After 5 minutes seated rest, blood  
27  
28 pressure was measured twice at 10-minute intervals using a computerized auto-mercury  
29  
30 sphygmomanometer (CH-5000, Citizen, Tokyo, Japan). We used the mean of the two  
31  
32 measurements in our analysis. Glucose, total cholesterol, and triglyceride levels were  
33  
34 measured in blood collected after overnight fasting using the Hitachi 7150 auto-analyzer  
35  
36 (Hitachi Ltd., Tokyo, Japan). Respiratory functions were measured using an electronic  
37  
38 spirometer (HI-501, HI-701, or HI-801; Chest M.I. Inc., Tokyo, Japan).  
39  
40  
41  
42

43 The participants reported their education (middle school or below, high school, junior  
44  
45 college, college or higher), marital status (single, married, divorced or separated, widowed),  
46  
47 smoking (never, former, current), alcohol consumption (no or occasional use, former  
48  
49 drinking, regular drinking), and physical activity (inactive, low, moderate or high). They also  
50  
51 reported whether they had a history of hypertension, diabetes, heart disease, heart surgery,  
52  
53 stroke, or whether they were taking medications for hypertension, diabetes, or heart diseases.  
54  
55 In the study hypertension was defined as the presence of any of the following: reporting a  
56  
57

1  
2 history of hypertension, taking any hypertensive drugs, a systemic blood pressure  $\geq 140$   
3 mmHg, or a diastolic blood pressure  $\geq 90$  mmHg. Diabetes was defined as the presence of  
4 any of the following: reporting a history of diabetes, taking diabetes medications, or a fasting  
5 blood sugar  $\geq 126$  mmol/L.  
6  
7  
8  
9  
10

## 11 **Statistical methods**

12  
13  
14 We used Cox proportional hazards models to investigate the associations of self-reported  
15 asthma with CVD, CHD and stroke mortality respectively. Time at entry was date of  
16 recruitment and time of exit was 31<sup>st</sup> December 2011, or death if earlier.  
17  
18  
19  
20

21 For ever asthma (those answering “yes” to asthma history or use of asthma  
22 medications), we estimated the association with CVD, CHD and stroke mortality controlling  
23 for age and sex. In a second model we controlled for age, sex, education and marital status,  
24 smoking, alcohol consumption, physical activity, hypertension, diabetes, BMI, total  
25 cholesterol, triglycerides, and history of heart disease/heart surgery/use of heart drug, and  
26 history of stroke. We also investigated the associations of CVD, CHD and stroke mortality  
27 with active and non-active asthma separately, compared to those without asthma.  
28  
29  
30  
31  
32  
33  
34  
35  
36

37 We investigated whether the associations differed in men and women, between age  
38 groups (above and below 60 years) and by smoking status (non-current smoker vs. current  
39 smokers) by including appropriate interaction terms in the models and conducting subgroup  
40 analyses. We then reported the p value for interaction by comparing models with and without  
41 the interaction terms using a likelihood ratio test.  
42  
43  
44  
45  
46  
47

48 We conducted a series of sensitivity analyses to test the robustness of findings. First,  
49 we excluded deaths due to CVD, CHD, or stroke occurring in the first two years of follow-up  
50 and repeated the analyses, as these deaths may be due to pre-existing cardiovascular diseases  
51 but not asthma. We excluded participants with a history of heart disease, heart surgery, use of  
52  
53  
54  
55  
56  
57  
58  
59  
60



heart medications and a history of stroke at baseline in a second sensitivity analysis. Lastly, we excluded participants with possible chronic obstructive pulmonary disease (COPD) at baseline. In this analysis we excluded those who had an FEV<sub>1</sub>/FVC ratio (forced expiratory volume in 1 second divided by forced vital capacity) < 0.7.

The proportional hazards assumption was examined by plotting Schoenfeld residuals with time and by examining their correlation.

### Ethics approval

Our study complies with the Declaration of Helsinki; the China Medical University Hospital ethics committee has approved the research protocol and informed consent has been obtained from the subjects. The study was approved by the National Health Research Institutes, Taiwan, and the MJ Health Management Institution.

## RESULTS

Among the 446,346 participants there were 2,945 deaths from cardiovascular disease, 780 deaths from coronary heart disease and 1,146 deaths from stroke over the follow-up period. At baseline, 3.34% (n=14,917) of the participants reported to have ever asthma; 2.60% (n=11,603) reported to have a history of asthma only and 0.74% (n=3,314) reported to have active asthma. The characteristics of the participants according to baseline asthma status are presented in Table 1.

Table 1. Characteristics of the Participants in the MJ Health Check-up Programme, Taiwan (N=446346).

| Characteristic              | Asthma<br>(N= 14917) |        | No asthma<br>(N= 431429) |        |
|-----------------------------|----------------------|--------|--------------------------|--------|
|                             | <i>n</i>             | (%)    | <i>n</i>                 | %      |
| Female                      | 6,893                | (46.2) | 220,253                  | (51.1) |
| College or higher education | 5,726                | (38.4) | 143,649                  | (33.3) |
| Married                     | 8,659                | (58.0) | 281,011                  | (65.1) |
| Current smoker              | 3,461                | (23.2) | 98,730                   | (22.9) |
| Regular alcohol use         | 1,210                | (8.1)  | 29,884                   | (6.9)  |
| Physically inactive         | 7,462                | (50.0) | 220,976                  | (51.2) |

|                                                                                                                                                     |             |             |             |             |
|-----------------------------------------------------------------------------------------------------------------------------------------------------|-------------|-------------|-------------|-------------|
| Hypertension (history of hypertension + hypertensive drug use + systolic blood pressure $\geq$ 140 mmHg or diastolic blood pressure $\geq$ 90 mmHg) | 3,121       | (20.9)      | 77,972      | (18.1)      |
| Diabetes (history of diabetes + diabetes drug use + fasting blood glucose $\geq$ 126) mmol/L)                                                       | 841         | (5.6)       | 21,274      | (4.9)       |
| History of heart disease/heart surgery/use of heart drug                                                                                            | 1,045       | (7.0)       | 15,044      | (3.5)       |
| History of stroke                                                                                                                                   | 129         | (0.9)       | 2,050       | (0.5)       |
|                                                                                                                                                     | <i>Mean</i> | <i>(SD)</i> | <i>Mean</i> | <i>(SD)</i> |
| Age (years)                                                                                                                                         | 41.0        | (15.6)      | 40.0        | (13.4)      |
| Body mass index (kg/m <sup>2</sup> )                                                                                                                | 23.4        | (3.8)       | 23.0        | (3.6)       |
| Total cholesterol (mmol/L)                                                                                                                          | 5.0         | (1.0)       | 5.0         | (1.0)       |
| Triglycerides (mmol/L)                                                                                                                              | 3.0         | (2.4)       | 3.0         | (2.6)       |

In the age- and sex-adjusted model (Model 1), those with ever asthma had a 27% (Hazard Ratio [HR] 1.27, 95% Confidence Interval [CI]: 1.09, 1.48) increased risk of CVD (Table 2). In the multi-adjusted model (Model 2) the association attenuated (HR 1.13, 95% CI: 0.97, 1.31). Using a stricter definition of asthma (active asthma) we found that those that reported any current use of asthma medications had a 32% (HR 1.32, 95% CI: 1.08, 1.62) increased risk of dying from CVD in Model 2. In contrast there was no association of non-active asthma with CVD mortality (HR 0.96, 95% CI: 0.77, 1.62).

1  
2  
3  
4  
5  
6  
7  
8  
9  
10  
11  
12  
13  
14  
15  
16  
17  
18  
19  
20  
21  
22  
23  
24  
25  
26  
27  
28  
29  
30  
31  
32  
33  
34  
35  
36  
37  
38  
39  
40  
41  
42  
43  
44  
45  
46  
47

Table 2. Hazard Ratios (HRs) for the Association of Asthma with Cardiovascular Disease (CVD), Coronary Heart Disease (CHD), and Stroke Mortality in the MJ Health Check-up Programme, Taiwan

|                                  | N       | CVD mortality |         |              |         | CHD mortality |           |         |              | Stroke mortality |              |           |         |              |         |              |
|----------------------------------|---------|---------------|---------|--------------|---------|---------------|-----------|---------|--------------|------------------|--------------|-----------|---------|--------------|---------|--------------|
|                                  |         | Cases (n)     | Model 1 |              | Model 2 |               | Cases (n) | Model 1 |              | Model 2          |              | Cases (n) | Model 1 |              | Model 2 |              |
|                                  |         |               | HR      | (95% CI)     | HR      | 95% CI        |           | HR      | 95% CI       | HR               | 95% CI       |           | HR      | 95% CI       | HR      | 95% CI       |
| No asthma                        | 431,429 | 2,763         | 1.00    |              | 1.00    |               | 730       | 1.00    |              | 1.00             |              | 1078      | 1.00    |              | 1.00    |              |
| Asthma                           | 14,917  | 182           | 1.27    | (1.09 ,1.48) | 1.13    | (0.97 ,1.31)  | 50        | 1.29    | (0.97 ,1.72) | 1.09             | (0.82 ,1.45) | 68        | 1.23    | (0.96 ,1.57) | 1.14    | (0.89 ,1.46) |
| Non-active asthma (history only) | 11,603  | 84            | 1.04    | (0.84 ,1.29) | 0.96    | (0.77 ,1.19)  | 25        | 1.16    | (0.78 ,1.73) | 1.03             | (0.69 ,1.53) | 35        | 1.11    | (0.80 ,1.56) | 1.08    | (0.77 ,1.51) |
| Active asthma (current drug use) | 3,314   | 98            | 1.57    | (1.29 ,1.93) | 1.32    | (1.08 ,1.62)  | 25        | 1.46    | (0.98 ,2.17) | 1.16             | (0.78 ,1.73) | 33        | 1.37    | (0.97 ,1.94) | 1.23    | (0.86 ,1.74) |

Model 1: adjust for age and sex

Model 2: adjust for age, education, marital status, smoking, alcohol consumption, physical activity, diabetes, hypertension, body mass index, total cholesterol, triglyceride, history of heart disease/heart surgery/use of heart drug, and history of stroke

1  
2  
3           There was evidence that the association of asthma (grouped as non-active and active  
4 asthma) with the risk of dying from CVD was stronger in males than in females ( $P$  for  
5 interaction = 0.005 in Model 2) (Table 3). Men who reported ever asthma had a 25%  
6 increased risk (HR 1.25, 95% CI: 1.04, 1.49) of dying from CVD over the duration of the  
7 follow-up in Model 2; among men with ever asthma those with active asthma had a 63%  
8 higher risk (HR 1.63, 95% CI: 1.30, 2.04) compared to men without asthma, while men with  
9 non-active asthma showed no increased risk (HR 0.90, 95% CI: 0.68, 1.19). These  
10 associations were not found in women. When stratifying by age we found no appreciable  
11 differences (Supplementary table 1).  
12  
13  
14  
15  
16  
17  
18  
19  
20  
21  
22  
23  
24  
25  
26  
27  
28  
29  
30  
31  
32  
33  
34  
35  
36  
37  
38  
39  
40  
41  
42  
43  
44  
45  
46  
47  
48  
49  
50  
51  
52  
53  
54  
55  
56  
57  
58  
59  
60

Table 3. Hazard ratios (HRs) for the Association of Asthma with Cardiovascular Disease (CVD), Coronary Heart Disease (CHD), and Stroke Mortality by Sex in the MJ Health Check-up Programme, Taiwan

|                                             | N       | CVD mortality |         |              |         | CHD mortality |           |         |              | Stroke mortality |              |           |         |              |         |              |
|---------------------------------------------|---------|---------------|---------|--------------|---------|---------------|-----------|---------|--------------|------------------|--------------|-----------|---------|--------------|---------|--------------|
|                                             |         | Cases (n)     | Model 1 |              | Model 2 |               | Cases (n) | Model 1 |              | Model 2          |              | Cases (n) | Model 1 |              | Model 2 |              |
|                                             |         |               | HR      | (95% CI)     | HR      | 95% CI        |           | HR      | 95% CI       | HR               | 95% CI       |           | HR      | 95% CI       | HR      | 95% CI       |
| <b>Males</b>                                |         |               |         |              |         |               |           |         |              |                  |              |           |         |              |         |              |
| No asthma                                   | 211,176 | 1,730         | 1.00    |              | 1.00    |               | 494       | 1.00    |              | 1.00             |              | 657       | 1.00    |              | 1.00    |              |
| Asthma                                      | 8,024   | 132           | 1.39    | (1.16 ,1.66) | 1.25    | (1.04 ,1.49)  | 39        | 1.42    | (1.02 ,1.97) | 1.21             | (0.87 ,1.67) | 49        | 1.36    | (1.02 ,1.82) | 1.29    | (0.96 ,1.72) |
| Non-active asthma (history only)            | 6,130   | 50            | 0.96    | (0.73 ,1.28) | 0.90    | (0.68 ,1.19)  | 18        | 1.21    | (0.75 ,1.93) | 1.08             | (0.67 ,1.73) | 20        | 1.02    | (0.65 ,1.59) | 1.00    | (0.64 ,1.56) |
| Active asthma (current drug use)            | 1,894   | 82            | 1.91    | (1.53 ,2.38) | 1.63    | (1.30 ,2.04)  | 21        | 1.67    | (1.08 ,2.59) | 1.34             | (0.86 ,2.08) | 29        | 1.77    | (1.22 ,2.57) | 1.62    | (1.11 ,2.35) |
| <b>Females</b>                              |         |               |         |              |         |               |           |         |              |                  |              |           |         |              |         |              |
| No asthma                                   | 220,253 | 1,033         | 1.00    |              | 1.00    |               | 236       | 1.00    |              | 1.00             |              | 421       | 1.00    |              | 1.00    |              |
| Asthma                                      | 6,893   | 50            | 1.04    | (0.78 ,1.38) | 0.88    | (0.66 ,1.17)  | 11        | 0.97    | (0.53 ,1.78) | 0.82             | (0.44 ,1.51) | 19        | 0.98    | (0.62 ,1.56) | 0.89    | (0.56 ,1.42) |
| Non-active asthma (history only)            | 5,473   | 34            | 1.17    | (0.83 ,1.65) | 1.05    | (0.74 ,1.48)  | 7         | 1.05    | (0.49 ,2.22) | 0.93             | (0.44 ,1.99) | 15        | 1.28    | (0.77 ,2.14) | 1.21    | (0.72 ,2.03) |
| Active asthma (current drug use)            | 1,420   | 16            | 0.83    | (0.51 ,1.36) | 0.65    | (0.40 ,1.07)  | 4         | 0.86    | (0.32 ,2.32) | 0.67             | (0.25 ,1.81) | 4         | 0.52    | (0.20 ,1.40) | 0.45    | (0.17 ,1.20) |
| <b>Sex interaction p</b>                    |         |               |         |              |         |               |           |         |              |                  |              |           |         |              |         |              |
| Asthma (yes/no)                             |         |               | 0.19    |              | 0.10    |               | 0.40      |         | 0.27         |                  | 0.33         |           | 0.29    |              |         |              |
| Asthma (no, history only, history and drug) |         |               | 0.012   |              | 0.005   |               | 0.62      |         | 0.42         |                  | 0.043        |           | 0.032   |              |         |              |

Model 1: adjust for age

Model 2: adjust for age, education, marital status, smoking, alcohol consumption, physical activity, diabetes, hypertension, body mass index, total cholesterol, triglyceride, history of heart disease/heart surgery/use of heart drug, and history of stroke

1  
2  
3 When only looking at CHD mortality in the total sample, we found consistent  
4 associations with those of CVD mortality, although the associations of asthma with CHD  
5 mortality were somewhat weaker with limited statistical evidence given the smaller number of  
6 deaths and thus reduced power (Table 3). When stratifying by sex, we found a 67% increased  
7 risk (HR 1.67, 95% CI: 1.08, 2.59) for active asthma in men in the age-adjusted model (Model  
8 1) but the association was largely attenuated when additionally adjusting for potential  
9 confounders (Model 2). We did not find any association in women (Table 3). Similarly, we  
10 found a more than doubled risk in those below 60 years (HR 2.57, 95% CI: 1.06, 6.26) in  
11 Model 1 but the confidence interval was wide and the association was attenuated when  
12 adjusting for potential confounders (Supplementary Table 1).  
13  
14  
15  
16  
17  
18  
19  
20  
21  
22  
23  
24

25 When restricting our analyses to only stroke, we found similar but slightly weaker  
26 associations between asthma and stroke mortality (Table 1). We found a 77% increased risk in  
27 men with active asthma (HR 1.77, 95% CI: 1.22, 2.57) in Model 1, that persisted after  
28 adjusting for potential confounders in Model 2 (HR 1.62, 95% CI: 1.11, 2.35) (Table 2). This  
29 risk was not seen in women ( $P$  for interaction = 0.032). We found no differences in risk of  
30 having a stroke death associated with asthma between the age groups (i.e. below and above 60  
31 years old) (Supplementary Table 1).  
32  
33  
34  
35  
36  
37  
38  
39

40 When excluding deaths occurring during the two first years of follow-up, the results  
41 did not change considerably for any of the cardiovascular outcomes (Supplementary table 2).  
42  
43 When excluding participants with a history of heart disease, heart surgery, use of heart  
44 medications and a history of stroke at baseline, the results were generally similar to those of  
45 the main analysis except that the association between asthma and CHD was largely attenuated,  
46 although the number of CHD deaths was small ( $n=13$  and 10 in the non-active and active  
47 asthma groups respectively) in this analysis (Supplementary table 3). When excluding  
48 individuals with FEV1/FVC ratio  $<0.7$  at baseline, the analysis based on the remaining  
49  
50  
51  
52  
53  
54  
55  
56  
57  
58  
59  
60

1  
2  
3 sample showed that the effect estimate remained the same although the confidence interval  
4  
5 widened slightly because of lower power in this analysis (Supplementary table 4).  
6

7  
8 Overall there was no strong statistical evidence for a difference in the  
9  
10 association of asthma with CVD/CHD/Stroke mortality between current smokers and non-  
11  
12 current smokers (all p for interaction > 0.05), although there was a tendency towards stronger  
13  
14 associations in current smokers than in non- or ex-smokers (Supplementary table 5).  
15

## 16 17 18 **DISCUSSION**

19  
20 To our best knowledge this is the largest study to date on asthma and CVD mortality. In this  
21  
22 sample of more than 400,000 Taiwanese adults we found an increased risk of dying from  
23  
24 CVD in individuals with active, but not non-active, asthma. The risk of death from CHD or  
25  
26 stroke was increased in a similar manner, however in sensitivity analysis excluding those with  
27  
28 previous heart disease, only the associations with CVD and stroke mortality remained. For  
29  
30 deaths from CVD and stroke we found a stronger association with active asthma in men than  
31  
32 in women.  
33

34  
35 A few previous studies have investigated the association of asthma with risk of  
36  
37 cardiovascular disease. One very large recent study including almost one million Italian adults  
38  
39 agreed with our findings and reported asthma to be moderately associated with different  
40  
41 cardiovascular diseases(12). Additionally, this study did not find any differences in the  
42  
43 association between men and women, while our study observed a stronger association in men.  
44  
45 This Italian study was cross-sectional however, and there is no way of knowing whether the  
46  
47 CVD diagnosis preceded the asthma diagnosis. Additionally, this study did not have access to  
48  
49 spirometry measurements such as FEV<sub>1</sub> and FVC and thus was not able to exclude those with  
50  
51 a FEV<sub>1</sub>/FVC ratio of less than 0.7 to minimise the possibility of misclassification between  
52  
53 asthma and COPD.  
54  
55  
56  
57  
58  
59  
60

1  
2  
3 A smaller study was undertaken in Australia including approximately 4000 people  
4 amongst whom 500 were classified as having asthma(13). Individuals with asthma were not  
5 only identified by self-report, but also through identification of significant reversibility of  
6 airway obstruction. The result were in accordance with our findings and when subjects with  
7 COPD were excluded from the analysis ( $FEV_1/FVC < 0.7$  and  $FEV_1 < 80\%$  of predicted), the  
8 association of asthma with CVD remained.  
9  
10  
11  
12  
13  
14  
15

16 Coronary heart disease contributes to a large part of the burden of cardiovascular  
17 disease(14) and the risk of complications or even death is high, thus detecting novel risk  
18 factors is essential. A few studies have found an increased risk of CHD in patients with  
19 asthma(15, 16). However, the results are inconsistent, and a recent study including almost  
20 16 000 participants from the Atherosclerosis Risk in Communities (ARIC) Study failed to  
21 confirm this increase in risk of CHD in patients with current asthma (HR 0.69, 95% CI: 0.46,  
22 1.05) (5).  
23  
24  
25  
26  
27  
28  
29  
30  
31

32 In the current study, we generally observed stronger results in men than in women in  
33 this adult Taiwanese population. By contrast, other studies have previously found stronger  
34 associations in women than in men. A large prospective study by Iribarren and colleagues(17)  
35 found that the increased risk of CHD was higher in women with asthma (HR 1.49, 95% CI:  
36 1.43, 1.56) than in men (HR 1.28, 95% CI: 1.21, 1.34) ( $P$  for interaction  $< 0.001$ ). The authors  
37 speculate that the increased risk of CHD among people with asthma may be due to chronic  
38 inflammation in people with asthma. Supporting this is the fact that women with asthma tend  
39 to have more severe disease than men with asthma,(18) and likely more systemic  
40 inflammation.  
41  
42  
43  
44  
45  
46  
47  
48  
49  
50  
51

52 In spite of the devastating consequences of stroke, asthma as a novel risk factor has not been  
53 thoroughly investigated and only a few studies have examined this association. The  
54  
55  
56  
57



1  
2  
3 previously mentioned study using data from the ARIC Study,(5) found similar results to ours,  
4  
5 with a 55% increased risk of stroke (HR 1.55, 95% CI: 0.95, 2.52) in patients with current  
6  
7 asthma compared with those without asthma. A recent meta-analysis of five studies on asthma  
8  
9 and stroke found a pooled HR of 1.32 (95% CI: 1.13, 1.54)(19). In contrast to our findings,  
10  
11 this meta-analysis found that the associations between asthma and stroke were stronger in  
12  
13 women (HR 1.42, 95% CI: 1.15, 1.76) than in men (HR 1.19, 95% CI: 0.90, 1.43). The  
14  
15 authors speculate that sex hormones could play a crucial role in modulating immunological  
16  
17 inflammation in asthma. However, our results showed an increased risk in men, but not in  
18  
19 women. The underlying reasons driving these differences between studies are not clear and  
20  
21 further investigations from countries with different ethnicities may help to shed light on this  
22  
23 observation.  
24  
25

26  
27 The biological mechanisms by which asthma may influence CVD are not known, but  
28  
29 several mechanisms have been suggested. Asthma is associated with low-grade systemic  
30  
31 inflammation,(20) which could influence later risk of CVD(21). Previous studies also suggest  
32  
33 that C-reactive protein is associated with both asthma(22) and CVD(23, 24). Lung function  
34  
35 impairment is also associated with CVD risk(25, 26). Patients with impaired lung function  
36  
37 have increased inflammatory markers (including C-reactive protein, interleukin-1 $\beta$ , and  
38  
39 interleukin-6) (27), which are associated with atherosclerosis and cardiovascular events(21,  
40  
41 28). The long-term airway remodelling from the inflammatory response in asthma can  
42  
43 produce irreversible airway obstruction and cause a decline in lung function(29). In addition,  
44  
45 severe asthma exacerbations are associated with a more rapid decline in lung function(30).  
46  
47 Another hypothesis is that asthma is associated with risk of CVD through asthma medication  
48  
49 use, in particular the cardiotoxic effects of beta-2 ( $\beta_2$ ) agonists(31, 32). Finally, asthma may  
50  
51 be associated with CVD due to other factors such as obesity,(33) smoking,(34) or physical  
52  
53 inactivity(35). It is also possible that the association between asthma and CVD is due to  
54  
55  
56  
57  
58  
59  
60

1  
2  
3 comorbidities such as diabetes which has a strong link to CVD(36) and also to asthma(37). In  
4  
5 our study, we adjusted for these potential confounders however and it is unlikely that any  
6  
7 confounding by these factors would be behind the observed associations.  
8

9  
10 To the best of our knowledge, our study is the largest to date, investigating the link  
11  
12 between asthma and risk of death from cardiovascular disease. Despite the large study size,  
13  
14 the objective measures of lung function that allowed us to exclude possible misclassification  
15  
16 of asthma with COPD, and the wide range of potential confounders included in our models,  
17  
18 the limitations of this study must be considered.  
19

20  
21 There is no gold standard for asthma diagnosis and despite using spirometry measures  
22  
23 to exclude possible COPD, asthma in this study was confirmed based on self-report from a  
24  
25 questionnaire. Additionally, we cannot rule out the potential misdiagnosis of heart disease as  
26  
27 asthma. Among those diagnosed with asthma, we were unable to separate asthma patients by  
28  
29 disease onset (i.e., childhood vs. adulthood) or any other phenotype such as obesity-related,  
30  
31 exercise-induced and neutrophilic asthma(38), and it is possible that these phenotypes differ  
32  
33 in regard to asthma triggers(39), gender distribution(39) and systemic inflammation(40). For  
34  
35 example, obesity-related asthma which usually develops in adulthood might be of particular  
36  
37 importance to the development of cardiovascular disease. However, we were unable to  
38  
39 differentiate between these subgroups and therefore our observations may not be  
40  
41 representative of each. Finally, patients who used asthma medication less frequently than  
42  
43 daily were grouped together with other patients with only a history of asthma, defining a very  
44  
45 heterogeneous group which might be a limitation of this study.  
46  
47

48  
49 Taiwan and some other East Asian countries such as Japan and Hong Kong have some  
50  
51 of the lowest mortality rates from CVD in the world(41, 42). Furthermore, our sample was  
52  
53 fairly young (mean age 40.4 years), and these may have contributed to the relatively small  
54  
55  
56  
57  
58  
59  
60

1  
2  
3 number of CVD deaths in our study. This may have reduced our power to detect any small  
4  
5 effects of asthma on risk of CVD death.

6  
7 Observational studies inherently limit causal inference. Although we adjusted for a  
8  
9 number of potential confounders in our analyses, there is a possibility of uncontrolled  
10  
11 confounding contributing to the observed associations. Specifically, we did not have  
12  
13 information on pack years of cigarette smoking which could be a potential confounder.  
14  
15 However, any residual confounding would need to be strongly associated with both asthma  
16  
17 and CVD mortality and be unrelated to the covariates included in our models. Additionally,  
18  
19 bias due to the exclusion of participants with missing information might have limited our  
20  
21 study.  
22  
23

24  
25 Finally, the sample was from a health check-up programme run by a private company  
26  
27 and the participants may have come from a somewhat more advantaged socioeconomic  
28  
29 position than Taiwan's general population and therefore our findings may not be  
30  
31 representative of the general population. However, the cohort was similar to the general  
32  
33 population reported in a national survey(43) in terms of certain characteristics including the  
34  
35 prevalence of smoking.  
36  
37

## 38 **CONCLUSION**

39  
40 Our study suggests that asthma, particularly active asthma, may have adverse cardiovascular  
41  
42 consequences. For deaths from CVD and stroke, the association was stronger in men than in  
43  
44 women. The associations persisted even after adjustment for established CVD risk factors.  
45  
46 Further studies are needed to elucidate better the mechanisms underlying this association and  
47  
48 to clarify any sex difference in the association.  
49  
50

## 51 **ACKNOWLEDGEMENTS**

52  
53  
54  
55  
56  
57  
58  
59  
60

1  
2  
3 Raw data used for analysis in this research were provided by MJ Health Resource Center  
4 (Authorization Code: MJHRFB2014001C). The MJ Health Resource Foundation is  
5  
6 responsible for the data distribution. Any interpretation or conclusions drawn from the  
7  
8 research analysis do not represent the views of MJ Health Resource Center.  
9  
10

## 11 **COMPETING INTERESTS**

12  
13  
14  
15 None declared.  
16

## 17 **FUNDING**

18  
19  
20  
21 This work was supported by funding for the Liaison Committee between the Central Norway  
22  
23 Regional Health Authority and the Norwegian University of Science and Technology awarded  
24  
25 to Linn B. Strand and Ben M Brumpton. Ben M Brumpton works in a research unit funded by  
26  
27 Stiftelsen Kristian Gerhard Jebsen; Faculty of Medicine and Health Sciences, NTNU; The  
28  
29 Liaison Committee for education, research and innovation in Central Norway; and the Joint  
30  
31 Research Committee between St. Olavs Hospital and the Faculty of Medicine and Health  
32  
33 Sciences, NTNU.  
34  
35

## 36 **CONTRIBUTIONS**

37  
38  
39  
40 LBS wrote the analysis plan and wrote the first draft of the manuscript. MKT did the data  
41  
42 analysis. CPW supervised the work and reviewed the manuscript. SSC helped supervise the  
43  
44 work, reviewed the manuscript and coordinated the collaboration between the researchers.  
45  
46 BMB designed the study, helped write the analysis plan, wrote the methods section of the  
47  
48 manuscript and reviewed the manuscript. All authors confirm that they have reviewed and  
49  
50 approved the final version of the manuscript.  
51  
52

## 53 **DATA SHARING STATEMENT**

1  
2  
3  
4  
5  
6  
7  
8  
9  
10  
11  
12  
13  
14  
15  
16  
17  
18  
19  
20  
21  
22  
23  
24  
25  
26  
27  
28  
29  
30  
31  
32  
33  
34  
35  
36  
37  
38  
39  
40  
41  
42  
43  
44  
45  
46  
47  
48  
49  
50  
51  
52  
53  
54  
55  
56  
57  
58  
59  
60

No additional data are available.

For peer review only

## References

1. McKay J, Mensah GA, Greenlund K. The atlas of heart disease and stroke: World Health Organization; 2004.
2. Global asthma network. The global asthma report 2014 2014 [Available from: <http://www.globalasthmareport.org/>].
3. Wouters EF, Reynaert NL, Dentener MA, Vernooy JH. Systemic and local inflammation in asthma and chronic obstructive pulmonary disease: is there a connection? *Proc Am Thorac Soc*. 2009;6(8):638-47.
4. Koenig W, Sund M, Fröhlich M, Fischer H-G, Löwel H, Döring A, et al. C-reactive protein, a sensitive marker of inflammation, predicts future risk of coronary heart disease in initially healthy middle-aged men results from the MONICA (Monitoring Trends and Determinants in Cardiovascular Disease) Augsburg Cohort Study, 1984 to 1992. *Circulation*. 1999;99(2):237-42.
5. Schanen J, Iribarren C, Shahar E, Punjabi N, Rich S, Sorlie P, et al. Asthma and incident cardiovascular disease: the Atherosclerosis Risk in Communities Study. *Thorax*. 2005;60(8):633-8.
6. Iribarren C, Tolstykh IV, Eisner MD. Are patients with asthma at increased risk of coronary heart disease? *International journal of epidemiology*. 2004;33(4):743-8.
7. Onufrak SJ, Abramson JL, Austin HD, Holguin F, McClellan WM, Vaccarino LV. Relation of adult-onset asthma to coronary heart disease and stroke. *Am J Cardiol*. 2008;101(9):1247-52.
8. Chang S-S, Wen CP, Tsai MK, Lawlor DA, Yang YC, Gunnell D. Adiposity, its related biologic risk factors, and suicide: a cohort study of 542,088 Taiwanese adults. *Am J Epidemiol*. 2012;175(8):804-15.
9. Toren K, Brisman J, Jarvholm B. Asthma and asthma-like symptoms in adults assessed by questionnaires. A literature review. *Chest*. 1993;104(2):600-8.
10. de Marco R, Cerveri I, Bugiani M, Ferrari M, Verlato G. An undetected burden of asthma in Italy: the relationship between clinical and epidemiological diagnosis of asthma. *Eur Respir J*. 1998;11(3):599-605.
11. Lu T-H, Lee M-C, Chou M-C. Accuracy of cause-of-death coding in Taiwan: types of miscoding and effects on mortality statistics. *International journal of epidemiology*. 2000;29(2):336-43.
12. Cazzola M, Calzetta L, Bettoncelli G, Cricelli C, Romeo F, Matera MG, et al. Cardiovascular disease in asthma and COPD: a population-based retrospective cross-sectional study. *Respir Med*. 2012;106(2):249-56.
13. Appleton SL, Ruffin RE, Wilson DH, Taylor AW, Adams RJ. Asthma is associated with cardiovascular disease in a representative population sample. *Obesity Research & Clinical Practice*. 2008;2(2):91-9.
14. Roger VL. Epidemiology of myocardial infarction. *Med Clin N Am*. 2007;91(4):537-52.
15. Toren K, Lindholm NB. Do patients with severe asthma run an increased risk from ischaemic heart disease? *International journal of epidemiology*. 1996;25(3):617-20.
16. Musk A, Ryan G, Perera D, D'Souza B, Hockey R, Hobbs M. Mortality from asthma in Western Australia. *Med J Australia*. 1987;147(9):423-7.
17. Iribarren C, Tolstykh IV, Miller MK, Sobel E, Eisner MD. Adult asthma and risk of coronary heart disease, cerebrovascular disease, and heart failure: a prospective study of 2 matched cohorts. *Am J Epidemiol*. 2012:kws181.
18. Becklake MR, Kauffmann F. Gender differences in airway behaviour over the human life span. *Thorax*. 1999;54(12):1119-38.
19. Wen L-y, Ni H, Li K-s, Yang H-h, Cheng J, Wang X, et al. Asthma and Risk of Stroke: A Systematic Review and Meta-analysis. *J Stroke Cerebrovasc*. 2016;25(3):497-503.
20. Ishmael FT. The inflammatory response in the pathogenesis of asthma. *J Am Osteopath Assoc*. 2011;111(11\_suppl\_7):S11-S7.
21. Willerson JT, Ridker PM. Inflammation as a Cardiovascular Risk Factor. *Circulation*. 2004;109(21 suppl 1):II-2-II-10.

22. Arif AA, Delclos GL, COLMER-HAMOOD J. Association between asthma, asthma symptoms and C-reactive protein in US adults: Data from the national health and nutrition examination survey, 1999–2002. *Respirology*. 2007;12(5):675-82.
23. Kaptoge S, Angelantonio ED, Collaboration ERF. C-reactive protein concentration and risk of coronary heart disease, stroke, and mortality: an individual participant meta-analysis. *Lancet*. 2010;375(9709):132-40.
24. Liu Y, Wang J, Zhang L, Wang C, Wu J, Zhou Y, et al. Relationship between C-reactive protein and stroke: a large prospective community based study. *PLoS ONE*. 2014;9(9):e107017.
25. Hozawa A, Billings JL, Shahar E, Ohira T, Rosamond WD, Folsom AR. Lung function and ischemic stroke incidence: the Atherosclerosis Risk in Communities study. *CHEST Journal*. 2006;130(6):1642-9.
26. Gulsvik AK, Gulsvik A, Skovlund E, Thelle DS, Mowé M, Humerfelt S, et al. The association between lung function and fatal stroke in a community followed for 4 decades. *J Epidemiol Commun H*. 2012;66(11):1030-6.
27. Tamagawa E, van Eeden SF. Impaired lung function and risk for stroke: role of the systemic inflammation response? *CHEST Journal*. 2006;130(6):1631-3.
28. Kuo H-K, Yen C-J, Chang C-H, Kuo C-K, Chen J-H, Sorond F. Relation of C-reactive protein to stroke, cognitive disorders, and depression in the general population: systematic review and meta-analysis. *The Lancet Neurology*. 2005;4(6):371-80.
29. James AL, Palmer LJ, Kicic E, Maxwell PS, Lagan SE, Ryan GF, et al. Decline in lung function in the Busselton Health Study: the effects of asthma and cigarette smoking. *Am J Respir Crit Care Med*. 2005;171(2):109-14.
30. O'Byrne PM, Pedersen S, Lamm CJ, Tan WC, Busse WW. Severe exacerbations and decline in lung function in asthma. *Am J Respir Crit Care Med*. 2009;179(1):19-24.
31. Au DH, Curtis JR, Every NR, McDonnell MB, Fihn SD. Association between inhaled  $\beta$ -agonists and the risk of unstable angina and myocardial infarction. *Chest*. 2002;121(3):846-51.
32. Au DH, Lemaitre RN, Randall Curtis J, Smith NL, Psaty BM. The risk of myocardial infarction associated with inhaled  $\beta$ -adrenoceptor agonists. *Am J Respir Crit Care Med*. 2000;161(3):827-30.
33. Brumpton B, Langhammer A, Romundstad P, Chen Y, Mai X-M. General and abdominal obesity and incident asthma in adults: the HUNT study. *Eur Respir J*. 2013;41(2):323-9.
34. Coogan PF, Castro-Webb N, Yu J, O'Connor GT, Palmer JR, Rosenberg L. Active and passive smoking and the incidence of asthma in the Black Women's Health Study. *Am J Respir Crit Care Med*. 2015;191(2):168-76.
35. Eijkemans M, Mommers M, Jos MT, Thijs C, Prins MH. Physical activity and asthma: a systematic review and meta-analysis. *PLoS ONE*. 2012;7(12):e50775.
36. Howard BV, Cowan LD, Go O, Welty TK, Robbins DC, Lee ET, et al. Adverse effects of diabetes on multiple cardiovascular disease risk factors in women: the Strong Heart Study. *Diabetes Care*. 1998;21(8):1258-65.
37. Ehrlich SF, Quesenberry CP, Van Den Eeden SK, Shan J, Ferrara A. Patients Diagnosed With Diabetes Are at Increased Risk for Asthma, Chronic Obstructive Pulmonary Disease, Pulmonary Fibrosis, and Pneumonia but Not Lung Cancer. *Diabetes Care*. 2010;33(1):55-60.
38. Wenzel SE. Asthma phenotypes: the evolution from clinical to molecular approaches. *Nat Med*. 2012;18(5):716-25.
39. Wenzel SE. Asthma: defining of the persistent adult phenotypes. *Lancet*. 2006;368(9537):804-13.
40. Ólafsdóttir IS, Gislason T, Thjodleifsson B, Ólafsson Í, Gislason D, Jögi R, et al. C reactive protein levels are increased in non-allergic but not allergic asthma: a multicentre epidemiological study. *Thorax*. 2005;60(6):451-4.
41. Cheng Y, Chen K-J, Wang C-J, Chan S-H, Chang W-C, Chen J-H. Secular trends in coronary heart disease mortality, hospitalization rates, and major cardiovascular risk factors in Taiwan, 1971–2001. *Int J Cardiol*. 2005;100(1):47-52.

- 1  
2  
3 42. Finegold JA, Asaria P, Francis DP. Mortality from ischaemic heart disease by country, region,  
4 and age: statistics from World Health Organisation and United Nations. *Int J Cardiol.*  
5 2013;168(2):934-45.  
6 43. Wen CP, Levy DT, Cheng TY, Hsu C-C, Tsai SP. Smoking behaviour in Taiwan, 2001. *Tob*  
7 *Control.* 2005;14(suppl 1):i51-i5.  
8  
9  
10  
11  
12  
13  
14  
15  
16  
17  
18  
19  
20  
21  
22  
23  
24  
25  
26  
27  
28  
29  
30  
31  
32  
33  
34  
35  
36  
37  
38  
39  
40  
41  
42  
43  
44  
45  
46  
47  
48  
49  
50  
51  
52  
53  
54  
55  
56  
57  
58  
59  
60

For peer review only



**Supplementary Table 1. Hazard ratios (HRs) for the association of asthma with cardiovascular disease (CVD), coronary heart disease (CHD), and stroke mortality by age in the MJ health check-up programme, Taiwan**

|                                             | N       | CVD mortality |                     |                   |        |                   | CHD mortality |           |                     |                   |        | Stroke mortality  |        |           |                     |                   |        |                   |        |
|---------------------------------------------|---------|---------------|---------------------|-------------------|--------|-------------------|---------------|-----------|---------------------|-------------------|--------|-------------------|--------|-----------|---------------------|-------------------|--------|-------------------|--------|
|                                             |         | Cases (n)     | Rate per 100,000 py | Model 1           |        | Model 2           |               | Cases (n) | Rate per 100,000 py | Model 1           |        | Model 2           |        | Cases (n) | Rate per 100,000 py | Model 1           |        | Model 2           |        |
|                                             |         |               |                     | HR                | 95% CI | HR                | 95% CI        |           |                     | HR                | 95% CI | HR                | 95% CI |           |                     | HR                | 95% CI | HR                | 95% CI |
| <60 years                                   |         |               |                     |                   |        |                   |               |           |                     |                   |        |                   |        |           |                     |                   |        |                   |        |
| No asthma                                   | 384,436 | 802           | 22                  | 1.00              |        | 1.00              |               | 186       | 5                   | 1.00              |        | 1.00              |        | 319       | 9                   | 1.00              |        | 1.00              |        |
| Asthma                                      | 12,392  | 34            | 32                  | 1.30 (0.92 ,1.84) |        | 1.18 (0.84 ,1.66) |               | 11        | 10                  | 1.76 (0.96 ,3.24) |        | 1.54 (0.84 ,2.85) |        | 12        | 11                  | 1.16 (0.65 ,2.06) |        | 1.10 (0.62 ,1.97) |        |
| Non-active asthma (history only)            | 10,237  | 18            | 21                  | 0.99 (0.62 ,1.58) |        | 0.97 (0.61 ,1.54) |               | 6         | 7                   | 1.40 (0.62 ,3.15) |        | 1.32 (0.58 ,2.97) |        | 6         | 7                   | 0.83 (0.37 ,1.87) |        | 0.86 (0.39 ,1.94) |        |
| Active asthma (current drug use)            | 2,155   | 16            | 76                  | 2.02 (1.23 ,3.31) |        | 1.57 (0.96 ,2.58) |               | 5         | 24                  | 2.57 (1.06 ,6.26) |        | 1.95 (0.80 ,4.78) |        | 6         | 29                  | 1.89 (0.84 ,4.24) |        | 1.53 (0.68 ,3.44) |        |
| >=60 years                                  |         |               |                     |                   |        |                   |               |           |                     |                   |        |                   |        |           |                     |                   |        |                   |        |
| No asthma                                   | 46,993  | 1,961         | 421                 | 1.00              |        | 1.00              |               | 544       | 117                 | 1.00              |        | 1.00              |        | 759       | 163                 | 1.00              |        | 1.00              |        |
| Asthma                                      | 2,525   | 148           | 599                 | 1.27 (1.07 ,1.50) |        | 1.13 (0.95 ,1.33) |               | 39        | 158                 | 1.20 (0.87 ,1.66) |        | 1.02 (0.73 ,1.41) |        | 56        | 227                 | 1.25 (0.95 ,1.64) |        | 1.16 (0.88 ,1.52) |        |
| Non-active asthma (history only)            | 1,366   | 66            | 479                 | 1.05 (0.82 ,1.34) |        | 0.97 (0.76 ,1.24) |               | 19        | 138                 | 1.09 (0.69 ,1.71) |        | 0.96 (0.61 ,1.53) |        | 29        | 211                 | 1.19 (0.82 ,1.73) |        | 1.14 (0.79 ,1.65) |        |
| Active asthma (current drug use)            | 1,159   | 82            | 749                 | 1.52 (1.22 ,1.90) |        | 1.30 (1.04 ,1.63) |               | 20        | 183                 | 1.33 (0.85 ,2.08) |        | 1.07 (0.68 ,1.68) |        | 27        | 247                 | 1.31 (0.89 ,1.92) |        | 1.18 (0.80 ,1.74) |        |
| Age interaction p                           |         |               |                     |                   |        |                   |               |           |                     |                   |        |                   |        |           |                     |                   |        |                   |        |
| Asthma (yes/no)                             |         |               |                     | 0.85              |        | 0.50              |               |           |                     | 0.25              |        | 0.15              |        |           |                     | 0.85              |        | 1.00              |        |
| Asthma (no, history only, history and drug) |         |               |                     | 0.079             |        | 0.32              |               |           |                     | 0.15              |        | 0.22              |        |           |                     | 0.18              |        | 0.49              |        |

PY: person-years  
Model 1: adjust for sex  
Model 2: adjust for sex education, marital status, smoking, alcohol consumption, physical activity, diabetes, hypertension, body mass index, total cholesterol, triglyceride, history of heart disease/heart surgery/use of heart drug, and history of stroke

**Supplementary table 2. Hazard ratios (HRs) for the association of asthma with cardiovascular disease (CVD), coronary heart disease (CHD), and stroke mortality, excluding deaths<sup>a</sup> occurring during the two first years of follow-up, in the MJ health check-up programme, Taiwan**

|                                  | CVD mortality  |           |         |              |         |              | CHD mortality |         |              |         | Stroke mortality |           |         |              |         |              |
|----------------------------------|----------------|-----------|---------|--------------|---------|--------------|---------------|---------|--------------|---------|------------------|-----------|---------|--------------|---------|--------------|
|                                  | N <sup>a</sup> | Cases (n) | Model 1 |              | Model 2 |              | Cases (n)     | Model 1 |              | Model 2 |                  | Cases (n) | Model 1 |              | Model 2 |              |
|                                  |                |           | HR      | 95% CI       | HR      | 95% CI       |               | HR      | 95% CI       | HR      | 95% CI           |           | HR      | 95% CI       | HR      | 95% CI       |
| No asthma                        | 431,200        | 2,534     | 1.00    |              | 1.00    |              | 661           | 1.00    |              | 1.00    |                  | 988       | 1.00    |              | 1.00    |              |
| Asthma                           | 14,896         | 161       | 1.23    | (1.05 ,1.44) | 1.10    | (0.94 ,1.29) | 44            | 1.26    | (0.93 ,1.71) | 1.07    | (0.79 ,1.46)     | 60        | 1.18    | (0.91 ,1.53) | 1.10    | (0.85 ,1.44) |
| Non-active asthma (history only) | 11,597         | 78        | 1.05    | (0.84 ,1.32) | 0.98    | (0.78 ,1.23) | 22            | 1.13    | (0.74 ,1.72) | 1.01    | (0.66 ,1.54)     | 33        | 1.14    | (0.81 ,1.61) | 1.11    | (0.78 ,1.57) |
| Active asthma (current drug use) | 3,299          | 83        | 1.47    | (1.18 ,1.83) | 1.24    | (1.00 ,1.55) | 22            | 1.46    | (0.98 ,2.17) | 1.15    | (0.75 ,1.76)     | 27        | 1.23    | (0.84 ,1.80) | 1.10    | (0.75 ,1.62) |

Model 1: adjust for age and sex

Model 2: adjust for age, education, marital status, smoking, alcohol consumption, physical activity, diabetes, hypertension, body mass index, total cholesterol, triglyceride, history of heart disease/heart surgery/use of heart drug, and history of stroke

<sup>a</sup> The number of deaths due to CVD, CHD, and stroke varied and thus the total number of participants after excluding deaths due to each of three causes differed.

**Supplementary Table 3. Hazard ratios (HRs) for the association of asthma with cardiovascular disease (CVD), coronary heart disease (CHD), and stroke mortality, excluding individuals with history of heart disease / heart surgery / use of heart drug, and history of stroke at baseline, in the MJ health check-up programme, Taiwan**

|                                  | N       | CVD mortality |         |              |         |              | CHD mortality |         |              |         |              | Stroke mortality |         |              |         |              |
|----------------------------------|---------|---------------|---------|--------------|---------|--------------|---------------|---------|--------------|---------|--------------|------------------|---------|--------------|---------|--------------|
|                                  |         | Cases (n)     | Model 1 |              | Model 2 |              | Cases (n)     | Model 1 |              | Model 2 |              | Cases (n)        | Model 1 |              | Model 2 |              |
|                                  |         |               | HR      | 95% CI       | HR      | 95% CI       |               | HR      | 95% CI       | HR      | 95% CI       |                  | HR      | 95% CI       | HR      | 95% CI       |
| No asthma                        | 414,859 | 1,992         | 1.00    |              | 1.00    |              | 514           | 1.00    |              | 1.00    |              | 823              | 1.00    |              | 1.00    |              |
| Asthma                           | 13,802  | 108           | 1.16    | (0.96 ,1.41) | 1.15    | (0.95 ,1.39) | 23            | 0.94    | (0.62 ,1.43) | 0.92    | (0.60 ,1.40) | 42               | 1.10    | (0.81 ,1.50) | 1.09    | (0.80 ,1.49) |
| Non-active asthma (history only) | 10,935  | 51            | 0.94    | (0.71 ,1.25) | 0.95    | (0.72 ,1.26) | 13            | 0.92    | (0.53 ,1.60) | 0.91    | (0.52 ,1.58) | 21               | 0.94    | (0.61 ,1.45) | 0.97    | (0.63 ,1.50) |
| Active asthma (current drug use) | 2,867   | 57            | 1.47    | (1.13 ,1.92) | 1.41    | (1.08 ,1.84) | 10            | 0.96    | (0.52 ,1.80) | 0.93    | (0.50 ,1.75) | 21               | 1.32    | (0.85 ,2.03) | 1.25    | (0.81 ,1.93) |

Model 1: adjust for age and sex

Model 2: adjust for age, education, marital status, smoking, alcohol consumption, physical activity, diabetes, hypertension, body mass index, total cholesterol and triglycerides.

**Supplementary table 4. Hazard ratios (HRs) for the association of asthma with cardiovascular disease (CVD), coronary heart disease (CHD), and stroke mortality, excluding individuals with FEV1/FCV < 0.7 at baseline, in the MJ health check-up programme, Taiwan**

|                                  | N       | CVD mortality |         |              |         |              | CHD mortality |         |              |         |              | Stroke mortality |         |              |         |              |
|----------------------------------|---------|---------------|---------|--------------|---------|--------------|---------------|---------|--------------|---------|--------------|------------------|---------|--------------|---------|--------------|
|                                  |         | Cases (n)     | Model 1 |              | Model 2 |              | Cases (n)     | Model 1 |              | Model 2 |              | Cases (n)        | Model 1 |              | Model 2 |              |
|                                  |         |               | HR      | (95% CI)     | HR      | 95% CI       |               | HR      | 95% CI       | HR      | 95% CI       |                  | HR      | 95% CI       | HR      | 95% CI       |
| No asthma                        | 352,774 | 2,319         | 1.00    |              | 1.00    |              | 617           | 1.00    |              | 1.00    |              | 902              | 1.00    |              | 1.00    |              |
| Asthma                           | 11,074  | 117           | 1.27    | (1.06 ,1.53) | 1.12    | (0.93 ,1.36) | 32            | 1.29    | (0.90 ,1.84) | 1.08    | (0.76 ,1.55) | 46               | 1.29    | (0.96 ,1.73) | 1.21    | (0.90 ,1.63) |
| Non-active asthma (history only) | 8,835   | 60            | 1.05    | (0.81 ,1.36) | 0.98    | (0.76 ,1.27) | 19            | 1.25    | (0.79 ,1.97) | 1.11    | (0.70 ,1.76) | 25               | 1.13    | (0.76 ,1.68) | 1.11    | (0.75 ,1.66) |
| Active asthma (current drug use) | 2,239   | 57            | 1.62    | (1.25 ,2.11) | 1.33    | (1.02 ,1.73) | 13            | 1.36    | (0.78 ,2.35) | 1.05    | (0.60 ,1.82) | 21               | 1.55    | (1.01 ,2.39) | 1.36    | (0.88 ,2.10) |

Model 1: adjust for age and sex

Model 2: adjust for age, education, marital status, smoking, alcohol consumption, physical activity, diabetes, hypertension, body mass index, total cholesterol, triglyceride, history of heart disease/heart surgery/use of heart drug, and history of stroke

Supplementary Table 5. Hazard ratios (HRs) for the association of asthma with cardiovascular disease (CVD), coronary heart disease (CHD), and stroke mortality by smoking status in the MJ health check-up programme, Taiwan

|                                             | N       | CVD mortality |         |              |         | CHD mortality |           |         |              | Stroke mortality |              |           |         |              |         |              |
|---------------------------------------------|---------|---------------|---------|--------------|---------|---------------|-----------|---------|--------------|------------------|--------------|-----------|---------|--------------|---------|--------------|
|                                             |         | Cases (n)     | Model 1 |              | Model 2 |               | Cases (n) | Model 1 |              | Model 2          |              | Cases (n) | Model 1 |              | Model 2 |              |
|                                             |         |               | HR      | 95% CI       | HR      | 95% CI        |           | HR      | 95% CI       | HR               | 95% CI       |           | HR      | 95% CI       | HR      | 95% CI       |
| Non or ex-smoker                            |         |               |         |              |         |               |           |         |              |                  |              |           |         |              |         |              |
| No asthma                                   | 332,699 | 1,898         | 1.00    |              | 1.00    | 470           | 1.00      |         | 1.00         | 754              | 1.00         |           | 1.00    |              |         |              |
| Asthma                                      | 11,456  | 113           | 1.15    | (0.95, 1.39) | 1.04    | (0.86, 1.25)  | 30        | 1.20    | (0.83, 1.73) | 1.03             | (0.71, 1.50) | 40        | 1.03    | (0.75, 1.42) | 0.98    | (0.71, 1.35) |
| Non-active asthma (history only)            | 9,018   | 56            | 1.00    | (0.77, 1.31) | 0.94    | (0.72, 1.23)  | 16        | 1.15    | (0.70, 1.89) | 1.04             | (0.63, 1.72) | 24        | 1.09    | (0.72, 1.63) | 1.07    | (0.71, 1.61) |
| Active asthma (current drug use)            | 2,438   | 57            | 1.33    | (1.02, 1.74) | 1.14    | (0.88, 1.49)  | 14        | 1.26    | (0.74, 2.14) | 1.02             | (0.60, 1.75) | 16        | 0.96    | (0.59, 1.58) | 0.87    | (0.53, 1.43) |
| Current smoker                              |         |               |         |              |         |               |           |         |              |                  |              |           |         |              |         |              |
| No asthma                                   | 98,730  | 865           | 1.00    |              | 1.00    | 260           | 1.00      |         | 1.00         | 324              | 1.00         |           | 1.00    |              |         |              |
| Asthma                                      | 3,461   | 69            | 1.55    | (1.21, 1.98) | 1.34    | (1.04, 1.71)  | 20        | 1.45    | (0.92, 2.29) | 1.20             | (0.75, 1.90) | 28        | 1.67    | (1.13, 2.45) | 1.51    | (1.02, 2.23) |
| Non-active asthma (history only)            | 2,585   | 28            | 1.13    | (0.78, 1.65) | 1.01    | (0.69, 1.48)  | 9         | 1.18    | (0.61, 2.30) | 1.01             | (0.52, 1.97) | 11        | 1.19    | (0.65, 2.17) | 1.11    | (0.61, 2.04) |
| Active asthma (current drug use)            | 876     | 41            | 2.07    | (1.51, 2.84) | 1.72    | (1.25, 2.36)  | 11        | 1.78    | (0.97, 3.25) | 1.41             | (0.77, 2.60) | 17        | 2.26    | (1.38, 3.69) | 1.97    | (1.20, 3.23) |
| Smoking status interaction p                |         |               |         |              |         |               |           |         |              |                  |              |           |         |              |         |              |
| Asthma (yes/no)                             |         |               |         |              | 0.18    |               |           |         |              | 0.74             |              |           |         |              | 0.12    |              |
| Asthma (no, history only, history and drug) |         |               |         |              | 0.27    |               |           |         |              | 0.82             |              |           |         |              | 0.088   |              |

Model 1: adjust for age

Model 2: adjust for age, education, marital status, alcohol consumption, physical activity, diabetes, hypertension, body mass index, total cholesterol, triglyceride, history of heart disease/heart surgery/use of heart drug, and history of stroke

**STROBE 2007 (v4) Statement—Checklist of items that should be included in reports of cohort studies**

| Section/Topic                | Item # | Recommendation                                                                                                                                                                       | Reported on page # |
|------------------------------|--------|--------------------------------------------------------------------------------------------------------------------------------------------------------------------------------------|--------------------|
| <b>Title and abstract</b>    | 1      | (a) Indicate the study's design with a commonly used term in the title or the abstract                                                                                               | 3                  |
|                              |        | (b) Provide in the abstract an informative and balanced summary of what was done and what was found                                                                                  | 3                  |
| <b>Introduction</b>          |        |                                                                                                                                                                                      |                    |
| Background/rationale         | 2      | Explain the scientific background and rationale for the investigation being reported                                                                                                 | 5                  |
| Objectives                   | 3      | State specific objectives, including any prespecified hypotheses                                                                                                                     | 5                  |
| <b>Methods</b>               |        |                                                                                                                                                                                      |                    |
| Study design                 | 4      | Present key elements of study design early in the paper                                                                                                                              | 6                  |
| Setting                      | 5      | Describe the setting, locations, and relevant dates, including periods of recruitment, exposure, follow-up, and data collection                                                      | 6                  |
| Participants                 | 6      | (a) Give the eligibility criteria, and the sources and methods of selection of participants. Describe methods of follow-up                                                           | 6                  |
|                              |        | (b) For matched studies, give matching criteria and number of exposed and unexposed                                                                                                  | NA                 |
| Variables                    | 7      | Clearly define all outcomes, exposures, predictors, potential confounders, and effect modifiers. Give diagnostic criteria, if applicable                                             | 6,7                |
| Data sources/<br>measurement | 8*     | For each variable of interest, give sources of data and details of methods of assessment (measurement). Describe comparability of assessment methods if there is more than one group | 6,7                |
| Bias                         | 9      | Describe any efforts to address potential sources of bias                                                                                                                            | 8,9                |
| Study size                   | 10     | Explain how the study size was arrived at                                                                                                                                            | 6                  |
| Quantitative variables       | 11     | Explain how quantitative variables were handled in the analyses. If applicable, describe which groupings were chosen and why                                                         | 8,9                |
| Statistical methods          | 12     | (a) Describe all statistical methods, including those used to control for confounding                                                                                                | 8,9                |
|                              |        | (b) Describe any methods used to examine subgroups and interactions                                                                                                                  | 8                  |
|                              |        | (c) Explain how missing data were addressed                                                                                                                                          | 6                  |
|                              |        | (d) If applicable, explain how loss to follow-up was addressed                                                                                                                       | NA                 |
|                              |        | (e) Describe any sensitivity analyses                                                                                                                                                | 8,9                |
| <b>Results</b>               |        |                                                                                                                                                                                      |                    |

|                          |     |                                                                                                                                                                                                              |       |
|--------------------------|-----|--------------------------------------------------------------------------------------------------------------------------------------------------------------------------------------------------------------|-------|
| Participants             | 13* | (a) Report numbers of individuals at each stage of study—eg numbers potentially eligible, examined for eligibility, confirmed eligible, included in the study, completing follow-up, and analysed            | 6     |
|                          |     | (b) Give reasons for non-participation at each stage                                                                                                                                                         | 6     |
|                          |     | (c) Consider use of a flow diagram                                                                                                                                                                           | NA    |
| Descriptive data         | 14* | (a) Give characteristics of study participants (eg demographic, clinical, social) and information on exposures and potential confounders                                                                     | 9     |
|                          |     | (b) Indicate number of participants with missing data for each variable of interest                                                                                                                          | 6     |
|                          |     | (c) Summarise follow-up time (eg, average and total amount)                                                                                                                                                  | 6     |
| Outcome data             | 15* | Report numbers of outcome events or summary measures over time                                                                                                                                               | 10    |
| Main results             | 16  | (a) Give unadjusted estimates and, if applicable, confounder-adjusted estimates and their precision (eg, 95% confidence interval). Make clear which confounders were adjusted for and why they were included | 10    |
|                          |     | (b) Report category boundaries when continuous variables were categorized                                                                                                                                    | 7,8   |
|                          |     | (c) If relevant, consider translating estimates of relative risk into absolute risk for a meaningful time period                                                                                             |       |
| Other analyses           | 17  | Report other analyses done—eg analyses of subgroups and interactions, and sensitivity analyses                                                                                                               | 14    |
| <b>Discussion</b>        |     |                                                                                                                                                                                                              |       |
| Key results              | 18  | Summarise key results with reference to study objectives                                                                                                                                                     | 15    |
| <b>Limitations</b>       |     |                                                                                                                                                                                                              |       |
| Interpretation           | 20  | Give a cautious overall interpretation of results considering objectives, limitations, multiplicity of analyses, results from similar studies, and other relevant evidence                                   | 15-18 |
| Generalisability         | 21  | Discuss the generalisability (external validity) of the study results                                                                                                                                        | 19    |
| <b>Other information</b> |     |                                                                                                                                                                                                              |       |
| Funding                  | 22  | Give the source of funding and the role of the funders for the present study and, if applicable, for the original study on which the present article is based                                                | 20    |

\*Give information separately for cases and controls in case-control studies and, if applicable, for exposed and unexposed groups in cohort and cross-sectional studies.

**Note:** An Explanation and Elaboration article discusses each checklist item and gives methodological background and published examples of transparent reporting. The STROBE checklist is best used in conjunction with this article (freely available on the Web sites of PLoS Medicine at <http://www.plosmedicine.org/>, Annals of Internal Medicine at <http://www.annals.org/>, and Epidemiology at <http://www.epidem.com/>). Information on the STROBE Initiative is available at [www.strobe-statement.org](http://www.strobe-statement.org).

# BMJ Open

## Is having asthma associated with an increased risk of dying from cardiovascular disease? A prospective cohort study of 446 346 Taiwanese adults

|                                 |                                                                                                                                                                                                                                                                                                                                                                                                                                                                                                                                                                                                                                                                                                                                                                                                                                                                          |
|---------------------------------|--------------------------------------------------------------------------------------------------------------------------------------------------------------------------------------------------------------------------------------------------------------------------------------------------------------------------------------------------------------------------------------------------------------------------------------------------------------------------------------------------------------------------------------------------------------------------------------------------------------------------------------------------------------------------------------------------------------------------------------------------------------------------------------------------------------------------------------------------------------------------|
| Journal:                        | <i>BMJ Open</i>                                                                                                                                                                                                                                                                                                                                                                                                                                                                                                                                                                                                                                                                                                                                                                                                                                                          |
| Manuscript ID                   | bmjopen-2017-019992.R2                                                                                                                                                                                                                                                                                                                                                                                                                                                                                                                                                                                                                                                                                                                                                                                                                                                   |
| Article Type:                   | Research                                                                                                                                                                                                                                                                                                                                                                                                                                                                                                                                                                                                                                                                                                                                                                                                                                                                 |
| Date Submitted by the Author:   | 12-Mar-2018                                                                                                                                                                                                                                                                                                                                                                                                                                                                                                                                                                                                                                                                                                                                                                                                                                                              |
| Complete List of Authors:       | Strand, Linn Beate; Norges teknisk-naturvitenskapelige universitet, Department of Public Health and Nursing<br>Tsai, Min; College of Public Health, National Taiwan University, Institute of Epidemiology and Preventive Medicine; China Medical University Hospital, Taiwan and Institute of Population Health Science, National Health Research Institutes<br>Wen, Chi-Pang ; National Health Research Institutes, Taiwan and Institute of Population Health Science; China Medical University Hospital<br>Chang, Shu-Sen; National Taiwan University, Institute of Health Behaviors and Community Sciences and Department of Public Health<br>Brumpton, Ben; St Olav Hospital, Department of Thoracic and Occupational Medicine; Norwegian University of Science and Technology, K.G. Jebsen Center for Genetic Epidemiology, Department of Public Health and Nursing |
| <b>Primary Subject Heading</b>: | Epidemiology                                                                                                                                                                                                                                                                                                                                                                                                                                                                                                                                                                                                                                                                                                                                                                                                                                                             |
| Secondary Subject Heading:      | Epidemiology                                                                                                                                                                                                                                                                                                                                                                                                                                                                                                                                                                                                                                                                                                                                                                                                                                                             |
| Keywords:                       | Asthma < THORACIC MEDICINE, CARDIOLOGY, EPIDEMIOLOGY                                                                                                                                                                                                                                                                                                                                                                                                                                                                                                                                                                                                                                                                                                                                                                                                                     |
|                                 |                                                                                                                                                                                                                                                                                                                                                                                                                                                                                                                                                                                                                                                                                                                                                                                                                                                                          |

SCHOLARONE™  
Manuscripts



1  
2  
3  
4 **Is having asthma associated with an increased risk of dying from cardiovascular**  
5 **disease? A prospective cohort study of 446 346 Taiwanese adults**  
6  
7

8  
9 **Author names:**

10  
11 Linn B. Strand, PhD <sup>a</sup>, Min Kuang Tsai, MS <sup>b,c</sup>, Chi Pang Wen, MD, PhD <sup>c</sup>, Shu-Sen Chang,  
12  
13 MD, PhD <sup>\*d</sup>, Ben M. Brumpton, PhD <sup>e</sup>  
14  
15

16  
17  
18 <sup>a</sup>**Affiliation:** Department of Public Health and Nursing, Norwegian University of Science and  
19  
20 Technology, Hakon Jarls gate 11, 7495 Trondheim, Norway.  
21  
22

23  
24 <sup>b</sup>**Affiliations:** Institute of Epidemiology and Preventive Medicine, College of Public Health,  
25  
26 National Taiwan University, No 17, Xu-Zhou Road, Taipei City 10055, Taiwan.  
27  
28

29  
30 <sup>c</sup> **Affiliations:** China Medical University Hospital, 91 Hsueh-Shih Road, Taichung 40402,  
31  
32 Taiwan and Institute of Population Health Science, National Health Research Institutes, 35  
33  
34 Keyan Road, Zhunan Town, Miaoli County 350, Taiwan.  
35  
36

37  
38 <sup>d</sup> **Affiliation:** Institute of Health Behaviors and Community Sciences and Department of  
39  
40 Public Health, College of Public Health, National Taiwan University, No 17, Xu-Zhou Road,  
41  
42 Taipei City 10055, Taiwan.  
43  
44

45  
46 <sup>e</sup> **Affiliations:** Department of Thoracic and Occupational Medicine, St Olav Hospital,  
47  
48 Prinsesse Kristinas gate 3, 7030 Trondheim, K.G. Jebsen Center for Genetic Epidemiology,  
49  
50 Department of Public Health and Nursing, Faculty of Medicine and Health Sciences,  
51  
52 Norwegian University of Science and Technology, NTNU, Trondheim, Hakon Jarls gate 11,  
53  
54 7495 Trondheim, Norway. MRC Integrative Epidemiology Unit, University of Bristol, UK  
55  
56  
57  
58  
59  
60

1  
2  
3 **\*Correspondence to:**  
4

5 Shu-Sen Chang  
6

7  
8 Institute of Health Behaviors and Community Sciences, College of Public Health, National  
9 Taiwan University, Taipei, Taiwan, No 17, Xu-Zhou Road, Taipei City 10055, Taiwan  
10

11  
12 Email: [shusenchang@ntu.edu.tw](mailto:shusenchang@ntu.edu.tw)  
13

14 **Key words:** Asthma, cardiology, epidemiology  
15

16  
17 **Word count:** 3337  
18  
19  
20  
21  
22  
23  
24  
25  
26  
27  
28  
29  
30  
31  
32  
33  
34  
35  
36  
37  
38  
39  
40  
41  
42  
43  
44  
45  
46  
47  
48  
49  
50  
51  
52  
53  
54  
55  
56  
57  
58  
59  
60

## ABSTRACT

**Objectives:** A significant proportion of cardiovascular disease (CVD) cannot be explained by well-known risk factors such as high cholesterol, hypertension and diabetes. One potential novel risk factor for CVD is asthma. We aimed to investigate the association between asthma and mortality due to cardiovascular disease.

**Design:** Prospective cohort study.

**Setting:** A large health check-up program from 1994 to 2011 in Taipei, Taiwan.

**Participants:** 446 346 Taiwanese adults. Each participant answered questions regarding asthma history (yes/no) and current daily use of asthma medications (yes/no). Active asthma was defined as those using current daily medication for asthma.

**Outcomes:** The participants were followed for mortality from CVD, coronary heart disease (CHD), and stroke obtained through linkage to the cause-of-death register until 31<sup>st</sup> December 2011.

**Results:** We found an increased risk of dying from CVD in individuals with active asthma (adjusted hazard ratio [aHR] = 1.32, 95 % confidence interval [CI] 1.08-1.62). The risk of death from CHD or stroke was increased in a similar manner (aHR=1.16, 95% CI 0.78-1.73 and aHR=1.23, 95% CI 0.86-1.74, respectively) although the hazard ratio estimates were less precise than that of CVD. For deaths from CVD, CHD and stroke we found stronger associations with active asthma than non-active asthma, and for CVD and stroke stronger associations in men than women.

**Conclusion:** Our study suggests that asthma, particularly active asthma, may be associated with adverse cardiovascular consequences

**Word count:** 202

### Strengths and limitations of this study

- We had objective measures of lung function that allowed us to exclude possible misclassification of asthma with COPD.
- However there is no gold standard for asthma diagnosis and asthma was confirmed based on self-report from a questionnaire.
- Taiwan has some of the lowest mortality rates from CVD in the world; our sample was young and this led to a relatively small number of CVD deaths.

1  
2  
3  
4  
5  
6  
7  
8  
9  
10  
11  
12  
13  
14  
15  
16  
17  
18  
19  
20  
21  
22  
23  
24  
25  
26  
27  
28  
29  
30  
31  
32  
33  
34  
35  
36  
37  
38  
39  
40  
41  
42  
43  
44  
45  
46  
47  
48  
49  
50  
51  
52  
53  
54  
55  
56  
57  
58  
59  
60

For peer review only

## INTRODUCTION

An estimated 17 million people die of cardiovascular diseases (CVDs) every year(1). Among the main forms of CVD are coronary heart disease (CHD) and stroke(1). Some well-known factors that increase the risk of developing CVD are unfavorable cholesterol levels, high blood pressure, diabetes and cigarette smoking. A significant proportion of CVD cannot be explained by these known risk factors, and a high incidence of the diseases makes it important to detect other potentially modifiable risk factors. One novel potential risk factor is asthma. As much as 330 million adults worldwide are estimated to have asthma,(2) emphasizing the potential public health importance of any effect of asthma on the occurrence of CVD. Such an association is plausible as it is suggested that asthma is associated with low-grade systemic inflammation and decline in pulmonary function,(3) which has been linked to an increase in CVD later in life(4, 5). Despite the plausibility of such an association, only a few studies have investigated the association between asthma and risk of CVD(5, 6). For example, Iribarren et al(6) recently reported a hazard ratio of 1.22 (95% confidence interval 1.14 to 1.31) for CHD related death or hospitalization in women with asthma compared with women without asthma after adjusting for demographic and established CHD risk factors; there was no association in men. To strengthen the existing evidence for a causative association, there is a need for large prospective studies on asthma and the risk of CVD, which can additionally investigate the influence of sex.

Approximately 5.5 million people die from stroke every year(1). Among the survivors, the consequences on physical, cognitive and emotional functioning are potentially devastating. Despite the devastating consequences of stroke, asthma as a novel risk factor has not been thoroughly investigated (5, 7). Our aim was to examine whether asthma at baseline was associated with an increased risk of deaths from CVD, and more specifically, CHD and

1  
2  
3 stroke utilizing a large cohort of more than 400,000 Taiwanese adults participating in a health  
4  
5 check-up program.  
6  
7

## 8 9 **METHODS**

### 10 11 **Study population**

12  
13 The study cohort consisted of 593,225 Taiwanese adults aged 20 years or older who  
14  
15 participated in a large health check-up program from 1994 to 2011, run by MJ Health  
16  
17 Management Institution, Taipei, Taiwan (<https://www.mjclinic.com.tw>). The baseline  
18  
19 questionnaire included questions about history of asthma and current use of asthma  
20  
21 medications. The participants went through a number of biochemical tests and physical  
22  
23 examinations as described previously (8). In the present study, 67,682 (11.4%) of 593,225  
24  
25 adults were excluded due to missing information on asthma or asthma medications, and a  
26  
27 further 79,197 (13.4%) were excluded as information was missing on potential confounding  
28  
29 variables including sociodemographic and life style factors. The analysis included 446,346  
30  
31 (75%) participants who attended check-ups between 1998 and 2011 and who had full  
32  
33 information on asthma, asthma medications, and potential confounding variables.  
34  
35  
36  
37

### 38 39 **Asthma**

40  
41 Participants answered questions related to asthma history (yes/no) and current daily  
42  
43 use of asthma medications (yes/no). We first defined asthma as those reporting a history of  
44  
45 asthma or current daily use of asthma drugs, and then grouped these individuals into two  
46  
47 subgroups: 1) non-active asthma (those who only reported a history of asthma but not current  
48  
49 use of asthma medications) and; 2) active asthma (those who reported current daily use of  
50  
51 asthma medications). Self-reported asthma is commonly used in population-based studies; this  
52  
53 approach has been evaluated and displays reasonable sensitivity and specificity(9, 10).  
54  
55  
56  
57

## CVD mortality

From baseline, the participants were followed for mortality until the end of follow-up, 31<sup>st</sup> December 2011, through linkage to the Taiwanese cause-of-death register using the national identification numbers. The International Classification of Diseases, Ninth Revision (ICD-9) or Tenth Revision (ICD-10), codes were used to identify mortality from CVD (ICD-9 390-459; ICD-10 I00-I99), CHD (ICD-9 codes 410-414; ICD-10 I20-I25), and stroke (ICD-9 430-438; ICD-10 I60-I69). A previous study showed good accuracy of cause-of-death coding for both heart diseases and stroke in Taiwan(11).

## Covariates

At the baseline health check-up participants were wearing light-weight clothes and were measured barefoot. Their weight (to the nearest 0.1 kg) and height (to the nearest mm) were measured using an auto-anthropometer, Nakamura KN-5000A (Nakamura, Tokyo, Japan) and their body mass index (BMI) was calculated ( $\text{kg}/\text{m}^2$ ). After 5 minutes seated rest, blood pressure was measured twice, at 10-minute intervals, using a computerized auto-mercury sphygmomanometer (CH-5000, Citizen, Tokyo, Japan). We used the mean of the two measurements in our analysis. Glucose, total cholesterol, and triglyceride levels were measured in blood collected after overnight fasting using the Hitachi 7150 auto-analyzer (Hitachi Ltd., Tokyo, Japan). Respiratory functions were measured using an electronic spirometer (HI-501, HI-701, or HI-801; Chest M.I. Inc., Tokyo, Japan).

The participants reported their education (middle school or below, high school, junior college, college or higher), marital status (single, married, divorced or separated, widowed), smoking status (never, former, current), alcohol consumption (no or occasional use, former drinking, regular drinking), and physical activity (inactive, low, moderate or high). They also reported whether they had a history of hypertension, diabetes, heart disease, heart surgery, stroke, or whether they were taking medications for hypertension, diabetes, or heart diseases.



1  
2  
3 Hypertension was defined as the presence of any of the following: reporting a history of  
4 hypertension, taking any hypertensive drugs, a systemic blood pressure  $\geq 140$  mmHg, or a  
5 diastolic blood pressure  $\geq 90$  mmHg. Diabetes was defined as the presence of any of the  
6 following: reporting a history of diabetes, taking diabetes medications, or a fasting blood  
7 sugar  $\geq 126$  mmol/L.  
8  
9  
10  
11  
12

### 13 14 **Statistical methods**

15  
16 We used Cox proportional hazards models to investigate the associations of self-reported  
17 asthma with CVD, CHD and stroke mortality respectively. Time at entry was date of  
18 recruitment and time of exit was 31<sup>st</sup> December 2011, or death if earlier.  
19  
20  
21  
22

23 We estimated the association between asthma (those answering “yes” to asthma  
24 history or use of asthma medications), and CVD, CHD and stroke mortality adjusting for age  
25 and sex (Model 1). In a second model we adjusted for age, sex, education and marital status,  
26 smoking status, alcohol consumption, physical activity, hypertension, diabetes, BMI, total  
27 cholesterol, triglycerides, and history of heart disease/heart surgery/use of heart drug, and  
28 history of stroke (Model 2). We also investigated the associations between active and non-  
29 active asthma and CVD, CHD and stroke mortality  
30  
31  
32  
33  
34  
35  
36  
37  
38

39 We investigated whether the associations differed in men and women, between age  
40 groups (above and below 60 years) and by smoking status (non-current smoker vs. current  
41 smokers) by including interaction terms in the models and conducting subgroup analyses. We  
42 reported the p value for interaction by comparing models with and without the interaction  
43 terms using a likelihood ratio test.  
44  
45  
46  
47  
48  
49

50 We conducted a series of sensitivity analyses to test the robustness of our findings.  
51 First, we excluded deaths due to CVD, CHD, or stroke occurring in the first two years of  
52 follow-up, as these deaths may be due to pre-existing cardiovascular diseases and not asthma.  
53  
54  
55  
56  
57

1  
2  
3 We excluded participants with a history of heart disease, heart surgery, use of heart  
4 medications and a history of stroke at baseline in a second sensitivity analysis. Lastly, we  
5 excluded participants with possible chronic obstructive pulmonary disease (COPD) at  
6 baseline. In this analysis we excluded those who had an FEV<sub>1</sub>/FVC ratio (forced expiratory  
7 volume in 1 second divided by forced vital capacity) < 0.7.  
8  
9  
10  
11  
12

13  
14 The proportional hazards assumption was examined by plotting Schoenfeld residuals  
15 with time and by examining their correlation.  
16  
17

### 18 **Ethics approval**

19  
20 Our study complies with the Declaration of Helsinki; the China Medical University Hospital  
21 ethics committee has approved the research protocol and informed consent has been obtained  
22 from the subjects. The study was approved by the National Health Research Institutes,  
23 Taiwan, and the MJ Health Management Institution.  
24  
25  
26  
27  
28  
29  
30

### 31 **Patient and Public Involvement**

32  
33  
34 This study utilized data from the MJ Health Management Institution, Taipei, Taiwan and  
35 patients were not involved in the design, recruitment, or conduct of this study. The outcome  
36 measures were not informed by patients' priorities, experience, and preferences. The MJ  
37 Health Management Institution will disseminate all key findings from this study on its  
38 website. Participants were thanked in the acknowledgment section.  
39  
40  
41  
42  
43  
44  
45  
46

## 47 **RESULTS**

48  
49 Among the 446,346 participants there were 2,945 deaths from cardiovascular disease, 780  
50 deaths from coronary heart disease and 1,146 deaths from stroke over the follow-up period.  
51  
52 At baseline, 3.34% (n=14,917) of the participants reported to have asthma; 2.60% (n=11,603)  
53  
54  
55  
56  
57  
58  
59  
60

reported to have a history of asthma and 0.74% (n=3,314) reported to have active asthma. The characteristics of the participants according to baseline asthma status are presented in Table 1.

Table 1. Characteristics of the Participants in the MJ Health Check-up Programme, Taiwan (N=446346).

| Characteristic                                                                                                                                      | Asthma<br>(N= 14917) |             | No asthma<br>(N= 431429) |             |
|-----------------------------------------------------------------------------------------------------------------------------------------------------|----------------------|-------------|--------------------------|-------------|
|                                                                                                                                                     | <i>n</i>             | (%)         | <i>n</i>                 | %           |
| Female                                                                                                                                              | 6,893                | (46.2)      | 220,253                  | (51.1)      |
| College or higher education                                                                                                                         | 5,726                | (38.4)      | 143,649                  | (33.3)      |
| Married                                                                                                                                             | 8,659                | (58.0)      | 281,011                  | (65.1)      |
| Current smoker                                                                                                                                      | 3,461                | (23.2)      | 98,730                   | (22.9)      |
| Regular alcohol use                                                                                                                                 | 1,210                | (8.1)       | 29,884                   | (6.9)       |
| Physically inactive                                                                                                                                 | 7,462                | (50.0)      | 220,976                  | (51.2)      |
| Hypertension (history of hypertension + hypertensive drug use + systolic blood pressure $\geq$ 140 mmHg or diastolic blood pressure $\geq$ 90 mmHg) | 3,121                | (20.9)      | 77,972                   | (18.1)      |
| Diabetes (history of diabetes + diabetes drug use + fasting blood glucose $\geq$ 126) mmol/L)                                                       | 841                  | (5.6)       | 21,274                   | (4.9)       |
| History of heart disease/heart surgery/use of heart drug                                                                                            | 1,045                | (7.0)       | 15,044                   | (3.5)       |
| History of stroke                                                                                                                                   | 129                  | (0.9)       | 2,050                    | (0.5)       |
|                                                                                                                                                     | <i>Mean</i>          | <i>(SD)</i> | <i>Mean</i>              | <i>(SD)</i> |
| Age (years)                                                                                                                                         | 41.0                 | (15.6)      | 40.0                     | (13.4)      |
| Body mass index (kg/m <sup>2</sup> )                                                                                                                | 23.4                 | (3.8)       | 23.0                     | (3.6)       |
| Total cholesterol (mmol/L)                                                                                                                          | 5.0                  | (1.0)       | 5.0                      | (1.0)       |
| Triglycerides (mmol/L)                                                                                                                              | 3.0                  | (2.4)       | 3.0                      | (2.6)       |

In the age- and sex-adjusted model (Model 1), those with asthma had a 27% (Hazard Ratio [HR] 1.27, 95% Confidence Interval [CI]: 1.09, 1.48) increased risk of CVD (Table 2).

In the multi-adjusted model (Model 2) the association attenuated (HR 1.13, 95% CI: 0.97, 1.31). Using a stricter definition of asthma (active asthma) we found that those that reported any current use of asthma medications had a 32% (HR 1.32, 95% CI: 1.08, 1.62) increased risk of dying from CVD in Model 2. In contrast there was no association between non-active asthma and CVD mortality (HR 0.96, 95% CI: 0.77, 1.62).

Table 2. Hazard Ratios (HRs) for the Association between Asthma and Cardiovascular Disease (CVD), Coronary Heart Disease (CHD), and Stroke Mortality in the MJ Health Check-up Programme, Taiwan

|                                  | N       | CVD mortality |         |              |         | CHD mortality |           |         |              | Stroke mortality |              |           |         |              |         |              |
|----------------------------------|---------|---------------|---------|--------------|---------|---------------|-----------|---------|--------------|------------------|--------------|-----------|---------|--------------|---------|--------------|
|                                  |         | Cases (n)     | Model 1 |              | Model 2 |               | Cases (n) | Model 1 |              | Model 2          |              | Cases (n) | Model 1 |              | Model 2 |              |
|                                  |         |               | HR      | (95% CI)     | HR      | 95% CI        |           | HR      | 95% CI       | HR               | 95% CI       |           | HR      | 95% CI       | HR      | 95% CI       |
| No asthma                        | 431,429 | 2,763         | 1.00    |              | 1.00    |               | 730       | 1.00    |              | 1.00             |              | 1078      | 1.00    |              | 1.00    |              |
| Asthma                           | 14,917  | 182           | 1.27    | (1.09, 1.48) | 1.13    | (0.97, 1.31)  | 50        | 1.29    | (0.97, 1.72) | 1.09             | (0.82, 1.45) | 68        | 1.23    | (0.96, 1.57) | 1.14    | (0.89, 1.46) |
| Non-active asthma (history only) | 11,603  | 84            | 1.04    | (0.84, 1.29) | 0.96    | (0.77, 1.19)  | 25        | 1.16    | (0.78, 1.73) | 1.03             | (0.69, 1.53) | 35        | 1.11    | (0.80, 1.56) | 1.08    | (0.77, 1.51) |
| Active asthma (current drug use) | 3,314   | 98            | 1.57    | (1.29, 1.93) | 1.32    | (1.08, 1.62)  | 25        | 1.46    | (0.98, 2.17) | 1.16             | (0.78, 1.73) | 33        | 1.37    | (0.97, 1.94) | 1.23    | (0.86, 1.74) |

Model 1: adjust for age and sex

Model 2: adjust for age, education, marital status, smoking, alcohol consumption, physical activity, diabetes, hypertension, body mass index, total cholesterol, triglyceride, history of heart disease/heart surgery/use of heart drug, and history of stroke

1  
2  
3           There was evidence that the association between asthma (grouped as non-active and  
4 active asthma) and CVD was stronger in males than in females ( $P$  for interaction = 0.005 in  
5 Model 2) (Table 3). Men who reported asthma had a 25% increased risk (HR 1.25, 95% CI:  
6 1.04, 1.49) of dying from CVD in Model 2, those with active asthma had a 63% increased risk  
7 (HR 1.63, 95% CI: 1.30, 2.04) compared to men without asthma, while men with non-active  
8 asthma showed no increased risk (HR 0.90, 95% CI: 0.68, 1.19). No associations were found  
9 in women. When stratifying by age we found no appreciable differences (Supplementary table  
10 1).  
11  
12  
13  
14  
15  
16  
17  
18  
19  
20  
21  
22  
23  
24  
25  
26  
27  
28  
29  
30  
31  
32  
33  
34  
35  
36  
37  
38  
39  
40  
41  
42  
43  
44  
45  
46  
47  
48  
49  
50  
51  
52  
53  
54  
55  
56  
57  
58  
59  
60

Table 3. Hazard ratios (HRs) for the Association between Asthma and Cardiovascular Disease (CVD), Coronary Heart Disease (CHD), and Stroke Mortality by Sex in the MJ Health Check-up Programme, Taiwan

|                                             | N       | CVD mortality |         |              |         | CHD mortality |           |         |              | Stroke mortality |              |           |         |              |         |              |
|---------------------------------------------|---------|---------------|---------|--------------|---------|---------------|-----------|---------|--------------|------------------|--------------|-----------|---------|--------------|---------|--------------|
|                                             |         | Cases (n)     | Model 1 |              | Model 2 |               | Cases (n) | Model 1 |              | Model 2          |              | Cases (n) | Model 1 |              | Model 2 |              |
|                                             |         |               | HR      | (95% CI)     | HR      | 95% CI        |           | HR      | 95% CI       | HR               | 95% CI       |           | HR      | 95% CI       | HR      | 95% CI       |
| <b>Males</b>                                |         |               |         |              |         |               |           |         |              |                  |              |           |         |              |         |              |
| No asthma                                   | 211,176 | 1,730         | 1.00    |              | 1.00    |               | 494       | 1.00    |              | 1.00             |              | 657       | 1.00    |              | 1.00    |              |
| Asthma                                      | 8,024   | 132           | 1.39    | (1.16 ,1.66) | 1.25    | (1.04 ,1.49)  | 39        | 1.42    | (1.02 ,1.97) | 1.21             | (0.87 ,1.67) | 49        | 1.36    | (1.02 ,1.82) | 1.29    | (0.96 ,1.72) |
| Non-active asthma (history only)            | 6,130   | 50            | 0.96    | (0.73 ,1.28) | 0.90    | (0.68 ,1.19)  | 18        | 1.21    | (0.75 ,1.93) | 1.08             | (0.67 ,1.73) | 20        | 1.02    | (0.65 ,1.59) | 1.00    | (0.64 ,1.56) |
| Active asthma (current drug use)            | 1,894   | 82            | 1.91    | (1.53 ,2.38) | 1.63    | (1.30 ,2.04)  | 21        | 1.67    | (1.08 ,2.59) | 1.34             | (0.86 ,2.08) | 29        | 1.77    | (1.22 ,2.57) | 1.62    | (1.11 ,2.35) |
| <b>Females</b>                              |         |               |         |              |         |               |           |         |              |                  |              |           |         |              |         |              |
| No asthma                                   | 220,253 | 1,033         | 1.00    |              | 1.00    |               | 236       | 1.00    |              | 1.00             |              | 421       | 1.00    |              | 1.00    |              |
| Asthma                                      | 6,893   | 50            | 1.04    | (0.78 ,1.38) | 0.88    | (0.66 ,1.17)  | 11        | 0.97    | (0.53 ,1.78) | 0.82             | (0.44 ,1.51) | 19        | 0.98    | (0.62 ,1.56) | 0.89    | (0.56 ,1.42) |
| Non-active asthma (history only)            | 5,473   | 34            | 1.17    | (0.83 ,1.65) | 1.05    | (0.74 ,1.48)  | 7         | 1.05    | (0.49 ,2.22) | 0.93             | (0.44 ,1.99) | 15        | 1.28    | (0.77 ,2.14) | 1.21    | (0.72 ,2.03) |
| Active asthma (current drug use)            | 1,420   | 16            | 0.83    | (0.51 ,1.36) | 0.65    | (0.40 ,1.07)  | 4         | 0.86    | (0.32 ,2.32) | 0.67             | (0.25 ,1.81) | 4         | 0.52    | (0.20 ,1.40) | 0.45    | (0.17 ,1.20) |
| <b>Sex interaction p</b>                    |         |               |         |              |         |               |           |         |              |                  |              |           |         |              |         |              |
| Asthma (yes/no)                             |         |               | 0.19    |              | 0.10    |               | 0.40      |         | 0.27         |                  | 0.33         |           | 0.29    |              |         |              |
| Asthma (no, history only, history and drug) |         |               | 0.012   |              | 0.005   |               | 0.62      |         | 0.42         |                  | 0.043        |           | 0.032   |              |         |              |

Model 1: adjust for age

Model 2: adjust for age, education, marital status, smoking, alcohol consumption, physical activity, diabetes, hypertension, body mass index, total cholesterol, triglyceride, history of heart disease/heart surgery/use of heart drug, and history of stroke

1  
2  
3 The associations between asthma and CHD mortality, were consistent with those of  
4 CVD mortality, although less precise due to the smaller number of deaths (Table 2). When  
5 stratifying by sex, we found a 67% increased risk (HR 1.67, 95% CI: 1.08, 2.59) for CHD  
6 among men with active asthma in the age-adjusted model (Model 1) but the association was  
7 largely attenuated when adjusting for additional potential confounders (Model 2). We did not  
8 find any association among women (Table 3). We found more than double the risk in those  
9 below 60 years (HR 2.57, 95% CI: 1.06, 6.26) in Model 1 but the confidence interval was  
10 wide and the association was attenuated when adjusting for additional potential confounders  
11 (Supplementary Table 1).  
12  
13  
14  
15  
16  
17  
18  
19  
20  
21

22 When investigating mortality due to stroke, we found similar but slightly weaker  
23 associations between asthma and stroke mortality than asthma and CVD mortality (Table 2?).  
24 We found a 77% increased risk in men with active asthma (HR 1.77, 95% CI: 1.22, 2.57) in  
25 Model 1, that persisted after adjusting for potential confounders in Model 2 (HR 1.62, 95%  
26 CI: 1.11, 2.35) (Table 3). This risk was not seen in women ( $P$  for interaction = 0.032). We  
27 found no differences in the association between asthma and stroke mortality between age  
28 groups (i.e. below and above 60 years old) (Supplementary Table 1).  
29  
30  
31  
32  
33  
34  
35  
36  
37

38 When excluding deaths occurring during the two first years of follow-up, the results  
39 did not change considerably for any of the cardiovascular outcomes (Supplementary table 2).  
40 When excluding participants with a history of heart disease, heart surgery, use of heart  
41 medications and a history of stroke at baseline, the results were generally similar to those of  
42 the main analysis except that the association between asthma and CHD was largely attenuated,  
43 although the number of CHD deaths was small ( $n=13$  and 10 in the non-active and active  
44 asthma groups respectively) in this analysis (Supplementary table 3). When excluding  
45 individuals with FEV1/FVC ratio  $<0.7$  at baseline, the analysis based on the remaining  
46  
47  
48  
49  
50  
51  
52  
53  
54  
55  
56  
57  
58  
59  
60

1  
2  
3 sample showed that the effect estimate remained the same although the confidence interval  
4  
5 widened slightly because of lower power in this analysis (Supplementary table 4).  
6

7  
8 Overall there was no statistical evidence for a difference in the  
9  
10 association between asthma and CVD/CHD/Stroke mortality between current smokers and  
11  
12 non-current smokers (all p for interaction > 0.05), although there was a tendency towards  
13  
14 stronger associations in current smokers than in non- or ex-smokers (Supplementary table 5).  
15

## 16 17 18 **DISCUSSION**

19  
20 To the best of our knowledge this is the largest study to date on asthma and CVD mortality. In  
21  
22 this sample of more than 400,000 Taiwanese adults we found an increased risk of dying from  
23  
24 CVD in individuals with active, but not non-active, asthma. The risk of death from CHD or  
25  
26 stroke was increased in a similar manner, however in sensitivity analysis excluding those with  
27  
28 previous heart disease, only the associations with CVD and stroke mortality remained. For  
29  
30 deaths from CVD and stroke we found a stronger association with active asthma in men than  
31  
32 in women.  
33

34  
35 A few previous studies have investigated the association between asthma and risk of  
36  
37 cardiovascular disease. One very large recent study including almost one million Italian adults  
38  
39 agreed with our findings and reported asthma to be moderately associated with different  
40  
41 cardiovascular diseases(12). Additionally, this study did not find any differences in the  
42  
43 association between men and women, while our study observed a stronger association in men.  
44  
45 This Italian study was cross-sectional however, and there is no way of knowing whether the  
46  
47 CVD diagnosis preceded the asthma diagnosis. Additionally, this study did not have access to  
48  
49 spirometry measurements such as FEV<sub>1</sub> and FVC and thus was not able to exclude those with  
50  
51 a FEV<sub>1</sub>/FVC ratio of less than 0.7 to minimise the possibility of misclassification between  
52  
53 asthma and COPD.  
54  
55  
56  
57  
58  
59  
60



1  
2  
3 A smaller study was undertaken in Australia including approximately 4000 people  
4 amongst whom 500 were classified as having asthma(13). Individuals with asthma were not  
5 only identified by self-report, but also through identification of significant reversibility of  
6 airway obstruction. The result were in accordance with our findings and when subjects with  
7 COPD were excluded from the analysis ( $FEV_1/FVC < 0.7$  and  $FEV_1 < 80\%$  of predicted), the  
8 association between asthma and CVD remained.  
9  
10  
11  
12  
13  
14  
15

16 Coronary heart disease contributes to a large part of the burden of cardiovascular  
17 disease(14) and the risk of complications or even death is high, thus detecting novel risk  
18 factors is essential. A few studies have found an increased risk of CHD in patients with  
19 asthma(15, 16). However, the results are inconsistent, and a recent study including almost  
20 16 000 participants from the Atherosclerosis Risk in Communities (ARIC) Study failed to  
21 confirm this increase in risk of CHD in patients with current asthma (HR 0.69, 95% CI: 0.46,  
22 1.05) (5).  
23  
24  
25  
26  
27  
28  
29  
30

31 In the current study, we generally observed stronger results in men than in women in  
32 this adult Taiwanese population. By contrast, other studies have previously found stronger  
33 associations in women than men. A large prospective study by Iribarren and colleagues(17)  
34 found that the increased risk of CHD was higher in women with asthma (HR 1.49, 95% CI:  
35 1.43, 1.56) than in men (HR 1.28, 95% CI: 1.21, 1.34) ( $P$  for interaction  $< 0.001$ ). The authors  
36 speculate that the increased risk of CHD among people with asthma may be due to chronic  
37 inflammation in people with asthma. Supporting this is the fact that women with asthma tend  
38 to have more severe disease than men with asthma,(18) and likely more systemic  
39 inflammation.  
40  
41  
42  
43  
44  
45  
46  
47  
48  
49  
50

51  
52 In spite of the devastating consequences of stroke, asthma as a novel risk factor has not been  
53 thoroughly investigated and only a few studies have examined this association. The  
54  
55  
56  
57

1  
2  
3 previously mentioned study using data from the ARIC Study,(5) found similar results to ours,  
4  
5 with a 55% increased risk of stroke (HR 1.55, 95% CI: 0.95, 2.52) in patients with current  
6  
7 asthma compared with those without asthma. A recent meta-analysis of five studies on asthma  
8  
9 and stroke found a pooled HR of 1.32 (95% CI: 1.13, 1.54)(19). In contrast to our findings,  
10  
11 this meta-analysis found that the associations between asthma and stroke were stronger in  
12  
13 women (HR 1.42, 95% CI: 1.15, 1.76) than in men (HR 1.19, 95% CI: 0.90, 1.43). The  
14  
15 authors speculate that sex hormones could play a crucial role in modulating immunological  
16  
17 inflammation in asthma. However, our results showed an increased risk in men, but not in  
18  
19 women. The underlying reasons driving these differences between studies are not clear and  
20  
21 further investigations from countries with different ethnicities may help to shed light on this  
22  
23 observation.  
24  
25

26  
27 The biological mechanisms by which asthma may influence CVD are not known, but  
28  
29 several mechanisms have been suggested. Asthma is associated with low-grade systemic  
30  
31 inflammation,(20) which could influence later risk of CVD(21). Previous studies also suggest  
32  
33 that C-reactive protein is associated with both asthma(22) and CVD(23, 24). Lung function  
34  
35 impairment is also associated with CVD risk(25, 26). Patients with impaired lung function  
36  
37 have increased inflammatory markers (including C-reactive protein, interleukin-1 $\beta$ , and  
38  
39 interleukin-6) (27), which are associated with atherosclerosis and cardiovascular events(21,  
40  
41 28). The long-term airway remodelling from the inflammatory response in asthma can  
42  
43 produce irreversible airway obstruction and cause a decline in lung function(29). In addition,  
44  
45 severe asthma exacerbations are associated with a more rapid decline in lung function(30).  
46  
47 Another hypothesis is that asthma is associated with risk of CVD through asthma medication  
48  
49 use, in particular the cardiotoxic effects of beta-2 ( $\beta_2$ ) agonists(31, 32). Finally, asthma may  
50  
51 be associated with CVD due to other factors such as obesity,(33) smoking,(34) or physical  
52  
53 inactivity(35). It is also possible that the association between asthma and CVD is due to  
54  
55  
56  
57  
58  
59  
60

1  
2  
3 comorbidities such as diabetes which has a strong link to CVD(36) and also to asthma(37). In  
4  
5 our study, we adjusted for these potential confounders however and it is unlikely that any  
6  
7 confounding by these factors would be behind the observed associations.  
8

9  
10 To the best of our knowledge, our study is the largest to date, investigating the  
11  
12 association between asthma and risk of death from cardiovascular disease. Despite the large  
13  
14 study size, the objective measures of lung function that allowed us to exclude possible  
15  
16 misclassification of asthma with COPD, and the wide range of potential confounders included  
17  
18 in our models, the limitations of this study must be considered.  
19

20  
21 There is no gold standard for asthma diagnosis and despite using spirometry measures  
22  
23 to exclude possible COPD, asthma in this study was indicated by self-report from a  
24  
25 questionnaire. Additionally, we cannot rule out the potential misdiagnosis of heart disease as  
26  
27 asthma. Among those diagnosed with asthma, we were unable to separate asthma patients by  
28  
29 disease onset (i.e., childhood vs. adulthood) or any other phenotype such as obesity-related,  
30  
31 exercise-induced and neutrophilic asthma(38), and it is possible that these phenotypes differ  
32  
33 in regard to asthma triggers(39), gender distribution(39) and systemic inflammation(40). For  
34  
35 example, obesity-related asthma which usually develops in adulthood might be of particular  
36  
37 importance to the development of cardiovascular disease. However, we were unable to  
38  
39 differentiate between these subgroups and therefore our observations may not be  
40  
41 representative of each. Finally, patients who used asthma medication less frequently than  
42  
43 daily were grouped together with other patients with only a history of asthma, defining a very  
44  
45 heterogeneous group which might be a limitation of this study.  
46  
47

48  
49 Taiwan and some other East Asian countries such as Japan and Hong Kong have some  
50  
51 of the lowest mortality rates from CVD in the world(41, 42). Furthermore, our sample was  
52  
53 fairly young (mean age 40.4 years), and these may have contributed to the relatively small  
54  
55  
56  
57  
58  
59  
60

1  
2  
3 number of CVD deaths in our study. This may have reduced our power to detect any small  
4  
5 effects of asthma on risk of CVD death.

6  
7 Observational studies inherently limit causal inference. Although we adjusted for a  
8  
9 number of potential confounders in our analyses, there is a possibility of uncontrolled  
10  
11 confounding contributing to the observed associations. Specifically, we did not have  
12  
13 information on pack years of cigarette smoking which could be a potential confounder.  
14  
15 However, any residual confounding would need to be strongly associated with both asthma  
16  
17 and CVD mortality and be unrelated to the covariates included in our models. Additionally,  
18  
19 bias due to the exclusion of participants with missing information might have limited our  
20  
21 study.  
22  
23

24  
25 Finally, the sample was from a health check-up programme run by a private company  
26  
27 and the participants may have come from a somewhat more advantaged socioeconomic  
28  
29 position than Taiwan's general population and therefore our findings may not be  
30  
31 representative of the general population. However, the cohort was similar to the general  
32  
33 population reported in a national survey(43) in terms of certain characteristics including the  
34  
35 prevalence of smoking.  
36  
37

## 38 **CONCLUSION**

39  
40 Our study suggests that asthma, particularly active asthma, may be associated with adverse  
41  
42 cardiovascular consequences. For deaths from CVD and stroke, the association was stronger  
43  
44 in men than in women. The associations persisted even after adjustment for established CVD  
45  
46 risk factors. Further studies are needed to elucidate better the mechanisms underlying this  
47  
48 association and to clarify any sex difference in the association.  
49  
50

## 51 **ACKNOWLEDGEMENTS**

52  
53  
54  
55  
56  
57  
58  
59  
60

1  
2  
3 We thank the participants. Raw data used for analysis in this research were provided by MJ  
4 Health Resource Center (Authorization Code: MJHRFB2014001C). The MJ Health Resource  
5 Foundation is responsible for the data distribution. Any interpretation or conclusions drawn  
6  
7 from the research analysis do not represent the views of MJ Health Resource Center.  
8  
9  
10

## 11 **COMPETING INTERESTS**

12  
13  
14  
15 None declared.  
16  
17

## 18 **FUNDING**

19  
20  
21 This work was supported by funding for the Liaison Committee between the Central Norway  
22 Regional Health Authority and the Norwegian University of Science and Technology awarded  
23 to Linn B. Strand and Ben M Brumpton. Ben M Brumpton works in a research unit funded by  
24  
25 Stiftelsen Kristian Gerhard Jebsen; Faculty of Medicine and Health Sciences, NTNU; The  
26  
27 Liaison Committee for education, research and innovation in Central Norway; and the Joint  
28  
29 Research Committee between St. Olavs Hospital and the Faculty of Medicine and Health  
30  
31 Sciences, NTNU.  
32  
33  
34  
35  
36

## 37 **CONTRIBUTIONS**

38  
39  
40 LBS wrote the analysis plan and wrote the first draft of the manuscript. MKT did the data  
41  
42 analysis. CPW supervised the work and reviewed the manuscript. SSC helped supervise the  
43  
44 work, reviewed the manuscript and coordinated the collaboration between the researchers.  
45  
46 BMB designed the study, helped write the analysis plan, wrote the methods section of the  
47  
48 manuscript and reviewed the manuscript. All authors confirm that they have reviewed and  
49  
50 approved the final version of the manuscript.  
51  
52

## 53 **DATA SHARING STATEMENT**

1  
2  
3 No additional data are available.  
4  
5  
6  
7  
8  
9  
10  
11  
12  
13  
14  
15  
16  
17  
18  
19  
20  
21  
22  
23  
24  
25  
26  
27  
28  
29  
30  
31  
32  
33  
34  
35  
36  
37  
38  
39  
40  
41  
42  
43  
44  
45  
46  
47  
48  
49  
50  
51  
52  
53  
54  
55  
56  
57  
58  
59  
60

For peer review only

## References

1. McKay J, Mensah GA, Greenlund K. The atlas of heart disease and stroke: World Health Organization; 2004.
2. Global asthma network. The global asthma report 2014 2014 [Available from: <http://www.globalasthmareport.org/>].
3. Wouters EF, Reynaert NL, Dentener MA, Vernooy JH. Systemic and local inflammation in asthma and chronic obstructive pulmonary disease: is there a connection? *Proc Am Thorac Soc*. 2009;6(8):638-47.
4. Koenig W, Sund M, Fröhlich M, Fischer H-G, Löwel H, Döring A, et al. C-reactive protein, a sensitive marker of inflammation, predicts future risk of coronary heart disease in initially healthy middle-aged men results from the MONICA (Monitoring Trends and Determinants in Cardiovascular Disease) Augsburg Cohort Study, 1984 to 1992. *Circulation*. 1999;99(2):237-42.
5. Schanen J, Iribarren C, Shahar E, Punjabi N, Rich S, Sorlie P, et al. Asthma and incident cardiovascular disease: the Atherosclerosis Risk in Communities Study. *Thorax*. 2005;60(8):633-8.
6. Iribarren C, Tolstykh IV, Eisner MD. Are patients with asthma at increased risk of coronary heart disease? *International journal of epidemiology*. 2004;33(4):743-8.
7. Onufrak SJ, Abramson JL, Austin HD, Holguin F, McClellan WM, Vaccarino LV. Relation of adult-onset asthma to coronary heart disease and stroke. *Am J Cardiol*. 2008;101(9):1247-52.
8. Chang S-S, Wen CP, Tsai MK, Lawlor DA, Yang YC, Gunnell D. Adiposity, its related biologic risk factors, and suicide: a cohort study of 542,088 Taiwanese adults. *Am J Epidemiol*. 2012;175(8):804-15.
9. Toren K, Brisman J, Jarvholm B. Asthma and asthma-like symptoms in adults assessed by questionnaires. A literature review. *Chest*. 1993;104(2):600-8.
10. de Marco R, Cerveri I, Bugiani M, Ferrari M, Verlato G. An undetected burden of asthma in Italy: the relationship between clinical and epidemiological diagnosis of asthma. *Eur Respir J*. 1998;11(3):599-605.
11. Lu T-H, Lee M-C, Chou M-C. Accuracy of cause-of-death coding in Taiwan: types of miscoding and effects on mortality statistics. *International journal of epidemiology*. 2000;29(2):336-43.
12. Cazzola M, Calzetta L, Bettoncelli G, Cricelli C, Romeo F, Matera MG, et al. Cardiovascular disease in asthma and COPD: a population-based retrospective cross-sectional study. *Respir Med*. 2012;106(2):249-56.
13. Appleton SL, Ruffin RE, Wilson DH, Taylor AW, Adams RJ. Asthma is associated with cardiovascular disease in a representative population sample. *Obesity Research & Clinical Practice*. 2008;2(2):91-9.
14. Roger VL. Epidemiology of myocardial infarction. *Med Clin N Am*. 2007;91(4):537-52.
15. Toren K, Lindholm NB. Do patients with severe asthma run an increased risk from ischaemic heart disease? *International journal of epidemiology*. 1996;25(3):617-20.
16. Musk A, Ryan G, Perera D, D'Souza B, Hockey R, Hobbs M. Mortality from asthma in Western Australia. *Med J Australia*. 1987;147(9):423-7.
17. Iribarren C, Tolstykh IV, Miller MK, Sobel E, Eisner MD. Adult asthma and risk of coronary heart disease, cerebrovascular disease, and heart failure: a prospective study of 2 matched cohorts. *Am J Epidemiol*. 2012:kws181.
18. Becklake MR, Kauffmann F. Gender differences in airway behaviour over the human life span. *Thorax*. 1999;54(12):1119-38.
19. Wen L-y, Ni H, Li K-s, Yang H-h, Cheng J, Wang X, et al. Asthma and Risk of Stroke: A Systematic Review and Meta-analysis. *J Stroke Cerebrovasc*. 2016;25(3):497-503.
20. Ishmael FT. The inflammatory response in the pathogenesis of asthma. *J Am Osteopath Assoc*. 2011;111(11\_suppl\_7):S11-S7.
21. Willerson JT, Ridker PM. Inflammation as a Cardiovascular Risk Factor. *Circulation*. 2004;109(21 suppl 1):II-2-II-10.

22. Arif AA, Delclos GL, COLMER-HAMOOD J. Association between asthma, asthma symptoms and C-reactive protein in US adults: Data from the national health and nutrition examination survey, 1999–2002. *Respirology*. 2007;12(5):675-82.
23. Kaptoge S, Angelantonio ED, Collaboration ERF. C-reactive protein concentration and risk of coronary heart disease, stroke, and mortality: an individual participant meta-analysis. *Lancet*. 2010;375(9709):132-40.
24. Liu Y, Wang J, Zhang L, Wang C, Wu J, Zhou Y, et al. Relationship between C-reactive protein and stroke: a large prospective community based study. *PLoS ONE*. 2014;9(9):e107017.
25. Hozawa A, Billings JL, Shahar E, Ohira T, Rosamond WD, Folsom AR. Lung function and ischemic stroke incidence: the Atherosclerosis Risk in Communities study. *CHEST Journal*. 2006;130(6):1642-9.
26. Gulsvik AK, Gulsvik A, Skovlund E, Thelle DS, Mowé M, Humerfelt S, et al. The association between lung function and fatal stroke in a community followed for 4 decades. *J Epidemiol Commun H*. 2012;66(11):1030-6.
27. Tamagawa E, van Eeden SF. Impaired lung function and risk for stroke: role of the systemic inflammation response? *CHEST Journal*. 2006;130(6):1631-3.
28. Kuo H-K, Yen C-J, Chang C-H, Kuo C-K, Chen J-H, Sorond F. Relation of C-reactive protein to stroke, cognitive disorders, and depression in the general population: systematic review and meta-analysis. *The Lancet Neurology*. 2005;4(6):371-80.
29. James AL, Palmer LJ, Kicic E, Maxwell PS, Lagan SE, Ryan GF, et al. Decline in lung function in the Busselton Health Study: the effects of asthma and cigarette smoking. *Am J Respir Crit Care Med*. 2005;171(2):109-14.
30. O'Byrne PM, Pedersen S, Lamm CJ, Tan WC, Busse WW. Severe exacerbations and decline in lung function in asthma. *Am J Respir Crit Care Med*. 2009;179(1):19-24.
31. Au DH, Curtis JR, Every NR, McDonnell MB, Fihn SD. Association between inhaled  $\beta$ -agonists and the risk of unstable angina and myocardial infarction. *Chest*. 2002;121(3):846-51.
32. Au DH, Lemaitre RN, Randall Curtis J, Smith NL, Psaty BM. The risk of myocardial infarction associated with inhaled  $\beta$ -adrenoceptor agonists. *Am J Respir Crit Care Med*. 2000;161(3):827-30.
33. Brumpton B, Langhammer A, Romundstad P, Chen Y, Mai X-M. General and abdominal obesity and incident asthma in adults: the HUNT study. *Eur Respir J*. 2013;41(2):323-9.
34. Coogan PF, Castro-Webb N, Yu J, O'Connor GT, Palmer JR, Rosenberg L. Active and passive smoking and the incidence of asthma in the Black Women's Health Study. *Am J Respir Crit Care Med*. 2015;191(2):168-76.
35. Eijkemans M, Mommers M, Jos MT, Thijs C, Prins MH. Physical activity and asthma: a systematic review and meta-analysis. *PLoS ONE*. 2012;7(12):e50775.
36. Howard BV, Cowan LD, Go O, Welty TK, Robbins DC, Lee ET, et al. Adverse effects of diabetes on multiple cardiovascular disease risk factors in women: the Strong Heart Study. *Diabetes Care*. 1998;21(8):1258-65.
37. Ehrlich SF, Quesenberry CP, Van Den Eeden SK, Shan J, Ferrara A. Patients Diagnosed With Diabetes Are at Increased Risk for Asthma, Chronic Obstructive Pulmonary Disease, Pulmonary Fibrosis, and Pneumonia but Not Lung Cancer. *Diabetes Care*. 2010;33(1):55-60.
38. Wenzel SE. Asthma phenotypes: the evolution from clinical to molecular approaches. *Nat Med*. 2012;18(5):716-25.
39. Wenzel SE. Asthma: defining of the persistent adult phenotypes. *Lancet*. 2006;368(9537):804-13.
40. Ólafsdóttir IS, Gislason T, Thjodleifsson B, Ólafsson Í, Gislason D, Jögi R, et al. C reactive protein levels are increased in non-allergic but not allergic asthma: a multicentre epidemiological study. *Thorax*. 2005;60(6):451-4.
41. Cheng Y, Chen K-J, Wang C-J, Chan S-H, Chang W-C, Chen J-H. Secular trends in coronary heart disease mortality, hospitalization rates, and major cardiovascular risk factors in Taiwan, 1971–2001. *Int J Cardiol*. 2005;100(1):47-52.



1  
2  
3  
4  
5  
6  
7  
8  
9  
10  
11  
12  
13  
14  
15  
16  
17  
18  
19  
20  
21  
22  
23  
24  
25  
26  
27  
28  
29  
30  
31  
32  
33  
34  
35  
36  
37  
38  
39  
40  
41  
42  
43  
44  
45  
46  
47  
48  
49  
50  
51  
52  
53  
54  
55  
56  
57  
58  
59  
60

42. Finegold JA, Asaria P, Francis DP. Mortality from ischaemic heart disease by country, region, and age: statistics from World Health Organisation and United Nations. *Int J Cardiol.* 2013;168(2):934-45.

43. Wen CP, Levy DT, Cheng TY, Hsu C-C, Tsai SP. Smoking behaviour in Taiwan, 2001. *Tob Control.* 2005;14(suppl 1):i51-i5.

For peer review only

**Supplementary Table 1. Hazard ratios (HRs) for the association of asthma with cardiovascular disease (CVD), coronary heart disease (CHD), and stroke mortality by age in the MJ health check-up programme, Taiwan**

|                                             | N       | CVD mortality |                     |                   |        |                   | CHD mortality |           |                     |                   |        | Stroke mortality  |        |           |                     |                   |        |                   |        |
|---------------------------------------------|---------|---------------|---------------------|-------------------|--------|-------------------|---------------|-----------|---------------------|-------------------|--------|-------------------|--------|-----------|---------------------|-------------------|--------|-------------------|--------|
|                                             |         | Cases (n)     | Rate per 100,000 PY | Model 1           |        | Model 2           |               | Cases (n) | Rate per 100,000 PY | Model 1           |        | Model 2           |        | Cases (n) | Rate per 100,000 PY | Model 1           |        | Model 2           |        |
|                                             |         |               |                     | HR                | 95% CI | HR                | 95% CI        |           |                     | HR                | 95% CI | HR                | 95% CI |           |                     | HR                | 95% CI | HR                | 95% CI |
| <60 years                                   |         |               |                     |                   |        |                   |               |           |                     |                   |        |                   |        |           |                     |                   |        |                   |        |
| No asthma                                   | 384,436 | 802           | 22                  | 1.00              |        | 1.00              |               | 186       | 5                   | 1.00              |        | 1.00              |        | 319       | 9                   | 1.00              |        | 1.00              |        |
| Asthma                                      | 12,392  | 34            | 32                  | 1.30 (0.92, 1.84) |        | 1.18 (0.84, 1.66) |               | 11        | 10                  | 1.76 (0.96, 3.24) |        | 1.54 (0.84, 2.85) |        | 12        | 11                  | 1.16 (0.65, 2.06) |        | 1.10 (0.62, 1.97) |        |
| Non-active asthma (history only)            | 10,237  | 18            | 21                  | 0.99 (0.62, 1.58) |        | 0.97 (0.61, 1.54) |               | 6         | 7                   | 1.40 (0.62, 3.15) |        | 1.32 (0.58, 2.97) |        | 6         | 7                   | 0.83 (0.37, 1.87) |        | 0.86 (0.39, 1.94) |        |
| Active asthma (current drug use)            | 2,155   | 16            | 76                  | 2.02 (1.23, 3.31) |        | 1.57 (0.96, 2.58) |               | 5         | 24                  | 2.57 (1.06, 6.26) |        | 1.95 (0.80, 4.78) |        | 6         | 29                  | 1.89 (0.84, 4.24) |        | 1.53 (0.68, 3.44) |        |
| >=60 years                                  |         |               |                     |                   |        |                   |               |           |                     |                   |        |                   |        |           |                     |                   |        |                   |        |
| No asthma                                   | 46,993  | 1,961         | 421                 | 1.00              |        | 1.00              |               | 544       | 117                 | 1.00              |        | 1.00              |        | 759       | 163                 | 1.00              |        | 1.00              |        |
| Asthma                                      | 2,525   | 148           | 599                 | 1.27 (1.07, 1.50) |        | 1.13 (0.95, 1.33) |               | 39        | 158                 | 1.20 (0.87, 1.66) |        | 1.02 (0.73, 1.41) |        | 56        | 227                 | 1.25 (0.95, 1.64) |        | 1.16 (0.88, 1.52) |        |
| Non-active asthma (history only)            | 1,366   | 66            | 479                 | 1.05 (0.82, 1.34) |        | 0.97 (0.76, 1.24) |               | 19        | 138                 | 1.09 (0.69, 1.71) |        | 0.96 (0.61, 1.53) |        | 29        | 211                 | 1.19 (0.82, 1.73) |        | 1.14 (0.79, 1.65) |        |
| Active asthma (current drug use)            | 1,159   | 82            | 749                 | 1.52 (1.22, 1.90) |        | 1.30 (1.04, 1.63) |               | 20        | 183                 | 1.33 (0.85, 2.08) |        | 1.07 (0.68, 1.68) |        | 27        | 247                 | 1.31 (0.89, 1.92) |        | 1.18 (0.80, 1.74) |        |
| Age interaction p                           |         |               |                     |                   |        |                   |               |           |                     |                   |        |                   |        |           |                     |                   |        |                   |        |
| Asthma (yes/no)                             |         |               |                     | 0.85              |        | 0.50              |               |           |                     | 0.25              |        | 0.15              |        |           |                     | 0.85              |        | 1.00              |        |
| Asthma (no, history only, history and drug) |         |               |                     | 0.079             |        | 0.32              |               |           |                     | 0.15              |        | 0.22              |        |           |                     | 0.18              |        | 0.49              |        |

PY: person-years

Model 1: adjust for sex

Model 2: adjust for sex education, marital status, smoking, alcohol consumption, physical activity, diabetes, hypertension, body mass index, total cholesterol, triglyceride, history of heart disease/heart surgery/use of heart drug, and history of stroke

**Supplementary table 2. Hazard ratios (HRs) for the association of asthma with cardiovascular disease (CVD), coronary heart disease (CHD), and stroke mortality, excluding deaths<sup>a</sup> occurring during the two first years of follow-up, in the MJ health check-up programme, Taiwan**

|                                  | CVD mortality  |           |         |              |         |              | CHD mortality |         |              |         | Stroke mortality |           |         |              |         |              |
|----------------------------------|----------------|-----------|---------|--------------|---------|--------------|---------------|---------|--------------|---------|------------------|-----------|---------|--------------|---------|--------------|
|                                  | N <sup>a</sup> | Cases (n) | Model 1 |              | Model 2 |              | Cases (n)     | Model 1 |              | Model 2 |                  | Cases (n) | Model 1 |              | Model 2 |              |
|                                  |                |           | HR      | 95% CI       | HR      | 95% CI       |               | HR      | 95% CI       | HR      | 95% CI           |           | HR      | 95% CI       | HR      | 95% CI       |
| No asthma                        | 431,200        | 2,534     | 1.00    |              | 1.00    |              | 661           | 1.00    |              | 1.00    |                  | 988       | 1.00    |              | 1.00    |              |
| Asthma                           | 14,896         | 161       | 1.23    | (1.05 ,1.44) | 1.10    | (0.94 ,1.29) | 44            | 1.26    | (0.93 ,1.71) | 1.07    | (0.79 ,1.46)     | 60        | 1.18    | (0.91 ,1.53) | 1.10    | (0.85 ,1.44) |
| Non-active asthma (history only) | 11,597         | 78        | 1.05    | (0.84 ,1.32) | 0.98    | (0.78 ,1.23) | 22            | 1.13    | (0.74 ,1.72) | 1.01    | (0.66 ,1.54)     | 33        | 1.14    | (0.81 ,1.61) | 1.11    | (0.78 ,1.57) |
| Active asthma (current drug use) | 3,299          | 83        | 1.47    | (1.18 ,1.83) | 1.24    | (1.00 ,1.55) | 22            | 1.46    | (0.98 ,2.17) | 1.15    | (0.75 ,1.76)     | 27        | 1.23    | (0.84 ,1.80) | 1.10    | (0.75 ,1.62) |

Model 1: adjust for age and sex

Model 2: adjust for age, education, marital status, smoking, alcohol consumption, physical activity, diabetes, hypertension, body mass index, total cholesterol, triglyceride, history of heart disease/heart surgery/use of heart drug, and history of stroke

<sup>a</sup> The number of deaths due to CVD, CHD, and stroke varied and thus the total number of participants after excluding deaths due to each of three causes differed.

**Supplementary Table 3. Hazard ratios (HRs) for the association of asthma with cardiovascular disease (CVD), coronary heart disease (CHD), and stroke mortality, excluding individuals with history of heart disease / heart surgery / use of heart drug, and history of stroke at baseline, in the MJ health check-up programme, Taiwan**

|                                  | N       | CVD mortality |         |              |         |              | CHD mortality |         |              |         |              | Stroke mortality |         |              |         |              |
|----------------------------------|---------|---------------|---------|--------------|---------|--------------|---------------|---------|--------------|---------|--------------|------------------|---------|--------------|---------|--------------|
|                                  |         | Cases (n)     | Model 1 |              | Model 2 |              | Cases (n)     | Model 1 |              | Model 2 |              | Cases (n)        | Model 1 |              | Model 2 |              |
|                                  |         |               | HR      | 95% CI       | HR      | 95% CI       |               | HR      | 95% CI       | HR      | 95% CI       |                  | HR      | 95% CI       | HR      | 95% CI       |
| No asthma                        | 414,859 | 1,992         | 1.00    |              | 1.00    |              | 514           | 1.00    |              | 1.00    |              | 823              | 1.00    |              | 1.00    |              |
| Asthma                           | 13,802  | 108           | 1.16    | (0.96, 1.41) | 1.15    | (0.95, 1.39) | 23            | 0.94    | (0.62, 1.43) | 0.92    | (0.60, 1.40) | 42               | 1.10    | (0.81, 1.50) | 1.09    | (0.80, 1.49) |
| Non-active asthma (history only) | 10,935  | 51            | 0.94    | (0.71, 1.25) | 0.95    | (0.72, 1.26) | 13            | 0.92    | (0.53, 1.60) | 0.91    | (0.52, 1.58) | 21               | 0.94    | (0.61, 1.45) | 0.97    | (0.63, 1.50) |
| Active asthma (current drug use) | 2,867   | 57            | 1.47    | (1.13, 1.92) | 1.41    | (1.08, 1.84) | 10            | 0.96    | (0.52, 1.80) | 0.93    | (0.50, 1.75) | 21               | 1.32    | (0.85, 2.03) | 1.25    | (0.81, 1.93) |

Model 1: adjust for age and sex

Model 2: adjust for age, education, marital status, smoking, alcohol consumption, physical activity, diabetes, hypertension, body mass index, total cholesterol and triglycerides.

**Supplementary table 4. Hazard ratios (HRs) for the association of asthma with cardiovascular disease (CVD), coronary heart disease (CHD), and stroke mortality, excluding individuals with FEV1/FCV < 0.7 at baseline, in the MJ health check-up programme, Taiwan**

|                                  | N       | CVD mortality |         |              |         |              | CHD mortality |         |              |         |              | Stroke mortality |         |              |         |              |
|----------------------------------|---------|---------------|---------|--------------|---------|--------------|---------------|---------|--------------|---------|--------------|------------------|---------|--------------|---------|--------------|
|                                  |         | Cases (n)     | Model 1 |              | Model 2 |              | Cases (n)     | Model 1 |              | Model 2 |              | Cases (n)        | Model 1 |              | Model 2 |              |
|                                  |         |               | HR      | (95% CI)     | HR      | 95% CI       |               | HR      | 95% CI       | HR      | 95% CI       |                  | HR      | 95% CI       | HR      | 95% CI       |
| No asthma                        | 352,774 | 2,319         | 1.00    |              | 1.00    |              | 617           | 1.00    |              | 1.00    |              | 902              | 1.00    |              | 1.00    |              |
| Asthma                           | 11,074  | 117           | 1.27    | (1.06 ,1.53) | 1.12    | (0.93 ,1.36) | 32            | 1.29    | (0.90 ,1.84) | 1.08    | (0.76 ,1.55) | 46               | 1.29    | (0.96 ,1.73) | 1.21    | (0.90 ,1.63) |
| Non-active asthma (history only) | 8,835   | 60            | 1.05    | (0.81 ,1.36) | 0.98    | (0.76 ,1.27) | 19            | 1.25    | (0.79 ,1.97) | 1.11    | (0.70 ,1.76) | 25               | 1.13    | (0.76 ,1.68) | 1.11    | (0.75 ,1.66) |
| Active asthma (current drug use) | 2,239   | 57            | 1.62    | (1.25 ,2.11) | 1.33    | (1.02 ,1.73) | 13            | 1.36    | (0.78 ,2.35) | 1.05    | (0.60 ,1.82) | 21               | 1.55    | (1.01 ,2.39) | 1.36    | (0.88 ,2.10) |

Model 1: adjust for age and sex  
 Model 2: adjust for age, education, marital status, smoking, alcohol consumption, physical activity, diabetes, hypertension, body mass index, total cholesterol, triglyceride, history of heart disease/heart surgery/use of heart drug, and history of stroke

**Supplementary Table 5. Hazard ratios (HRs) for the association of asthma with cardiovascular disease (CVD), coronary heart disease (CHD), and stroke mortality by smoking status in the MJ health check-up programme, Taiwan**

|                                             | N       | CVD mortality |         |              |         | CHD mortality |           |         |              | Stroke mortality |              |           |         |              |         |              |
|---------------------------------------------|---------|---------------|---------|--------------|---------|---------------|-----------|---------|--------------|------------------|--------------|-----------|---------|--------------|---------|--------------|
|                                             |         | Cases (n)     | Model 1 |              | Model 2 |               | Cases (n) | Model 1 |              | Model 2          |              | Cases (n) | Model 1 |              | Model 2 |              |
|                                             |         |               | HR      | 95% CI       | HR      | 95% CI        |           | HR      | 95% CI       | HR               | 95% CI       |           | HR      | 95% CI       | HR      | 95% CI       |
| Non or ex-smoker                            |         |               |         |              |         |               |           |         |              |                  |              |           |         |              |         |              |
| No asthma                                   | 332,699 | 1,898         | 1.00    |              | 1.00    | 470           | 1.00      |         | 1.00         | 754              | 1.00         |           | 1.00    |              |         |              |
| Asthma                                      | 11,456  | 113           | 1.15    | (0.95, 1.39) | 1.04    | (0.86, 1.25)  | 30        | 1.20    | (0.83, 1.73) | 1.03             | (0.71, 1.50) | 40        | 1.03    | (0.75, 1.42) | 0.98    | (0.71, 1.35) |
| Non-active asthma (history only)            | 9,018   | 56            | 1.00    | (0.77, 1.31) | 0.94    | (0.72, 1.23)  | 16        | 1.15    | (0.70, 1.89) | 1.04             | (0.63, 1.72) | 24        | 1.09    | (0.72, 1.63) | 1.07    | (0.71, 1.61) |
| Active asthma (current drug use)            | 2,438   | 57            | 1.33    | (1.02, 1.74) | 1.14    | (0.88, 1.49)  | 14        | 1.26    | (0.74, 2.14) | 1.02             | (0.60, 1.75) | 16        | 0.96    | (0.59, 1.58) | 0.87    | (0.53, 1.43) |
| Current smoker                              |         |               |         |              |         |               |           |         |              |                  |              |           |         |              |         |              |
| No asthma                                   | 98,730  | 865           | 1.00    |              | 1.00    | 260           | 1.00      |         | 1.00         | 324              | 1.00         |           | 1.00    |              |         |              |
| Asthma                                      | 3,461   | 69            | 1.55    | (1.21, 1.98) | 1.34    | (1.04, 1.71)  | 20        | 1.45    | (0.92, 2.29) | 1.20             | (0.75, 1.90) | 28        | 1.67    | (1.13, 2.45) | 1.51    | (1.02, 2.23) |
| Non-active asthma (history only)            | 2,585   | 28            | 1.13    | (0.78, 1.65) | 1.01    | (0.69, 1.48)  | 9         | 1.18    | (0.61, 2.30) | 1.01             | (0.52, 1.97) | 11        | 1.19    | (0.65, 2.17) | 1.11    | (0.61, 2.04) |
| Active asthma (current drug use)            | 876     | 41            | 2.07    | (1.51, 2.84) | 1.72    | (1.25, 2.36)  | 11        | 1.78    | (0.97, 3.25) | 1.41             | (0.77, 2.60) | 17        | 2.26    | (1.38, 3.69) | 1.97    | (1.20, 3.23) |
| Smoking status interaction p                |         |               |         |              |         |               |           |         |              |                  |              |           |         |              |         |              |
| Asthma (yes/no)                             |         |               |         |              | 0.18    |               |           |         |              | 0.74             |              |           |         |              | 0.12    |              |
| Asthma (no, history only, history and drug) |         |               |         |              | 0.27    |               |           |         |              | 0.82             |              |           |         |              | 0.088   |              |

Model 1: adjust for age

Model 2: adjust for age, education, marital status, alcohol consumption, physical activity, diabetes, hypertension, body mass index, total cholesterol, triglyceride, history of heart disease/heart surgery/use of heart drug, and history of stroke

**STROBE 2007 (v4) Statement—Checklist of items that should be included in reports of *cohort studies***

| Section/Topic                | Item # | Recommendation                                                                                                                                                                       | Reported on page # |
|------------------------------|--------|--------------------------------------------------------------------------------------------------------------------------------------------------------------------------------------|--------------------|
| <b>Title and abstract</b>    | 1      | (a) Indicate the study's design with a commonly used term in the title or the abstract                                                                                               | 3                  |
|                              |        | (b) Provide in the abstract an informative and balanced summary of what was done and what was found                                                                                  | 3                  |
| <b>Introduction</b>          |        |                                                                                                                                                                                      |                    |
| Background/rationale         | 2      | Explain the scientific background and rationale for the investigation being reported                                                                                                 | 5                  |
| Objectives                   | 3      | State specific objectives, including any prespecified hypotheses                                                                                                                     | 5                  |
| <b>Methods</b>               |        |                                                                                                                                                                                      |                    |
| Study design                 | 4      | Present key elements of study design early in the paper                                                                                                                              | 6                  |
| Setting                      | 5      | Describe the setting, locations, and relevant dates, including periods of recruitment, exposure, follow-up, and data collection                                                      | 6                  |
| Participants                 | 6      | (a) Give the eligibility criteria, and the sources and methods of selection of participants. Describe methods of follow-up                                                           | 6                  |
|                              |        | (b) For matched studies, give matching criteria and number of exposed and unexposed                                                                                                  | NA                 |
| Variables                    | 7      | Clearly define all outcomes, exposures, predictors, potential confounders, and effect modifiers. Give diagnostic criteria, if applicable                                             | 6,7                |
| Data sources/<br>measurement | 8*     | For each variable of interest, give sources of data and details of methods of assessment (measurement). Describe comparability of assessment methods if there is more than one group | 6,7                |
| Bias                         | 9      | Describe any efforts to address potential sources of bias                                                                                                                            | 8,9                |
| Study size                   | 10     | Explain how the study size was arrived at                                                                                                                                            | 6                  |
| Quantitative variables       | 11     | Explain how quantitative variables were handled in the analyses. If applicable, describe which groupings were chosen and why                                                         | 8,9                |
| Statistical methods          | 12     | (a) Describe all statistical methods, including those used to control for confounding                                                                                                | 8,9                |
|                              |        | (b) Describe any methods used to examine subgroups and interactions                                                                                                                  | 8                  |
|                              |        | (c) Explain how missing data were addressed                                                                                                                                          | 6                  |
|                              |        | (d) If applicable, explain how loss to follow-up was addressed                                                                                                                       | NA                 |
|                              |        | (e) Describe any sensitivity analyses                                                                                                                                                | 8,9                |
| <b>Results</b>               |        |                                                                                                                                                                                      |                    |

|                          |     |                                                                                                                                                                                                              |       |
|--------------------------|-----|--------------------------------------------------------------------------------------------------------------------------------------------------------------------------------------------------------------|-------|
| Participants             | 13* | (a) Report numbers of individuals at each stage of study—eg numbers potentially eligible, examined for eligibility, confirmed eligible, included in the study, completing follow-up, and analysed            | 6     |
|                          |     | (b) Give reasons for non-participation at each stage                                                                                                                                                         | 6     |
|                          |     | (c) Consider use of a flow diagram                                                                                                                                                                           | NA    |
| Descriptive data         | 14* | (a) Give characteristics of study participants (eg demographic, clinical, social) and information on exposures and potential confounders                                                                     | 9     |
|                          |     | (b) Indicate number of participants with missing data for each variable of interest                                                                                                                          | 6     |
|                          |     | (c) Summarise follow-up time (eg, average and total amount)                                                                                                                                                  | 6     |
| Outcome data             | 15* | Report numbers of outcome events or summary measures over time                                                                                                                                               | 10    |
| Main results             | 16  | (a) Give unadjusted estimates and, if applicable, confounder-adjusted estimates and their precision (eg, 95% confidence interval). Make clear which confounders were adjusted for and why they were included | 10    |
|                          |     | (b) Report category boundaries when continuous variables were categorized                                                                                                                                    | 7,8   |
|                          |     | (c) If relevant, consider translating estimates of relative risk into absolute risk for a meaningful time period                                                                                             |       |
| Other analyses           | 17  | Report other analyses done—eg analyses of subgroups and interactions, and sensitivity analyses                                                                                                               | 14    |
| <b>Discussion</b>        |     |                                                                                                                                                                                                              |       |
| Key results              | 18  | Summarise key results with reference to study objectives                                                                                                                                                     | 15    |
| <b>Limitations</b>       |     |                                                                                                                                                                                                              |       |
| Interpretation           | 20  | Give a cautious overall interpretation of results considering objectives, limitations, multiplicity of analyses, results from similar studies, and other relevant evidence                                   | 15-18 |
| Generalisability         | 21  | Discuss the generalisability (external validity) of the study results                                                                                                                                        | 19    |
| <b>Other information</b> |     |                                                                                                                                                                                                              |       |
| Funding                  | 22  | Give the source of funding and the role of the funders for the present study and, if applicable, for the original study on which the present article is based                                                | 20    |

\*Give information separately for cases and controls in case-control studies and, if applicable, for exposed and unexposed groups in cohort and cross-sectional studies.

**Note:** An Explanation and Elaboration article discusses each checklist item and gives methodological background and published examples of transparent reporting. The STROBE checklist is best used in conjunction with this article (freely available on the Web sites of PLoS Medicine at <http://www.plosmedicine.org/>, Annals of Internal Medicine at <http://www.annals.org/>, and Epidemiology at <http://www.epidem.com/>). Information on the STROBE Initiative is available at [www.strobe-statement.org](http://www.strobe-statement.org).
